# Supplementary material for: Human embryonic lung epithelial tips are multipotent progenitors that can be expanded in vitro as long-term self-renewing organoids
Source: eLife. 2017 Jun 30;6:e26575. doi: 10.7554/eLife.26575 (PMC5555721; doi:10.7554/eLife.26575)
Supplement: Figure 4—source data 1. — Percentage of cells scored as mesenchyme in freshly dissected tips and stalks. Expressed as percentage of non-ECAD+ cells from total DAPI+ cells. Quantitation done using the mesenchyme-macro.ijm for FIJI which is available as a supplemental file. DOI: http://dx.doi.org/10.7554/eLife.26575.024 [file elife-26575-fig4-data1.xlsx]

## Sheet: Sheet1
% mesenchymal contamination expressed as % non-ECAD+ cells from total DAPI+ cells.
Assessed using mesenchyme-macro.ijm for FIJI which is available as a supplemental file.
	Tip	Stalk
Biological Replicate 1	0.007	4.4
Biological Replicate 2	0.001	3.8
Biological Replicate 3	0.14	3.4
Biological Replicate 4	0	3.4
