# Supplementary material for: Human embryonic lung epithelial tips are multipotent progenitors that can be expanded in vitro as long-term self-renewing organoids
Source: eLife. 2017 Jun 30;6:e26575. doi: 10.7554/eLife.26575 (PMC5555721; doi:10.7554/eLife.26575)
Supplement: Figure 4—source data 2. — Percentage organoid forming efficiency and size increase from D1-11 of culture when fresh tips are plated in self-renewing medium +/- SB43125. Three independent experiments were performed on different lung samples. DOI: http://dx.doi.org/10.7554/eLife.26575.025 [file elife-26575-fig4-data2.xlsx]

## Sheet: Sheet1
Organoid establishment +/- SB431542
	% Organoid forming efficiency
	-SB43152	+SB43152
Biological replicate 1	39.5	100
Biological replicate 2	85.7	100
Biological replicate 3	90.1	100
	% Size increase (D1-11)
	-SB43152	+SB43152
Biological replicate 1	895.8	9717
Biological replicate 2	2879	5948
Biological replicate 3	1415	10414
