# Supplementary material for: Human embryonic lung epithelial tips are multipotent progenitors that can be expanded in vitro as long-term self-renewing organoids
Source: eLife. 2017 Jun 30;6:e26575. doi: 10.7554/eLife.26575 (PMC5555721; doi:10.7554/eLife.26575)
Supplement: Figure 4—source data 3. — Fold-change was normalised to one for self-renewing medium. Data for three individual organoid lines are shown. DOI: http://dx.doi.org/10.7554/eLife.26575.026 [file elife-26575-fig4-data3.xlsx]

## Sheet: Short qPCR
Fold-change normalised to 1 for SN medium. SOX2 qRT-PCR.										Fold-change normalised to 1 for SN medium. SOX9 qRT-PCR.
Condition	Organoid 1875	Organoid 12831	Organoid 1785	Mean	St Dev	SE	T-test			Condition	Organoid 1875	Organoid 12831	Organoid 1785	Mean	St Dev	SE	T-test
Self-renewing (SN)	1	1	1	1	0	0				Self-renewing (SN)	1	1	1	1	0	0
SN-all factors	1.68793	1.05513	0.746845	1.1633	0.479778	0.339255	0.58719			SN-all factors	0.198654	0.351576	0.40924	0.319824	0.108825	0.0769506	0.000413068
SN- SB431542TGFbi	1.03956	1.03636	0.89136	0.989092	0.0846537	0.0598592	0.834329			SN- SB431542TGFbi	0.0503492	0.679794	0.553556	0.4279	0.333005	0.23547	0.0409146
SN-RSPO1	0.840111	1.6203	1.49681	1.31907	0.419364	0.296535	0.257967			SN-RSPO1	0.779775	0.772175	1.28142	0.944456	0.291842	0.206363	0.758205
SN-EGF	1.10546	1.30322	0.974882	1.12785	0.16531	0.116892	0.251426			SN-EGF	0.398784	0.893804	0.856628	0.716405	0.275696	0.194946	0.149392
SN-Noggin	0.877331	1.34842	1.37472	1.20016	0.279885	0.197909	0.283192			SN-Noggin	0.840827	0.616896	1.13098	0.8629	0.25775	0.182257	0.409034
SN-FGF10	0.970314	1.28457	1.61826	1.29105	0.32402	0.229116	0.19474			SN-FGF10	0.593151	0.676842	1.10827	0.792754	0.276431	0.195466	0.263901
SN-FGF7	0.797399	1.17024	1.44889	1.13885	0.326879	0.231139	0.50272			SN-FGF7	1.36932	0.780971	1.31979	1.15669	0.326326	0.230747	0.452354
SN-FGF10/FGF7	1.44279	1.59682	1.66835	1.56932	0.115266	0.0815057	0.00102504			SN-FGF10/FGF7	0.0480508	0.650238	0.022761	0.24035	0.355199	0.251163	0.0207577
SN-CHIR99021	1.38015	1.20534	1.19852	1.26134	0.102955	0.0727999	0.0117224			SN-CHIR99021	0.0388944	0.59157	0.602637	0.411034	0.322329	0.227921	0.0340258
SN+ 2x SB431542	0.983039	1.334	1.5142	1.27708	0.270119	0.191003	0.150261			SN+ 2x SB431542	1.81892	0.741305	1.14535	1.23519	0.544395	0.384946	0.495884
SN+Dex50nM	0.620743	0.520901	1.11458	0.752075	0.317883	0.224777	0.248095			SN+Dex50nM	0.036158	0.628982	0.948362	0.537834	0.462882	0.327307	0.158799
