# Supplementary material for: Human embryonic lung epithelial tips are multipotent progenitors that can be expanded in vitro as long-term self-renewing organoids
Source: eLife journal article supplement (doi:10.7554/elife.26575), 2017-06-30

**A Human tip vs mouse tip transcriptome analysis**

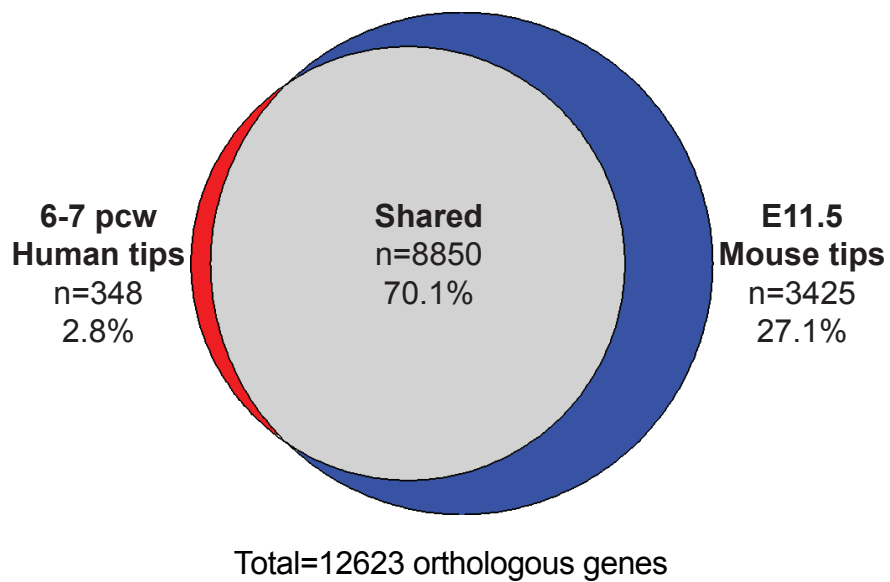

**B Gene expression levels are similar between mouse and human embryonic distal progenitors**

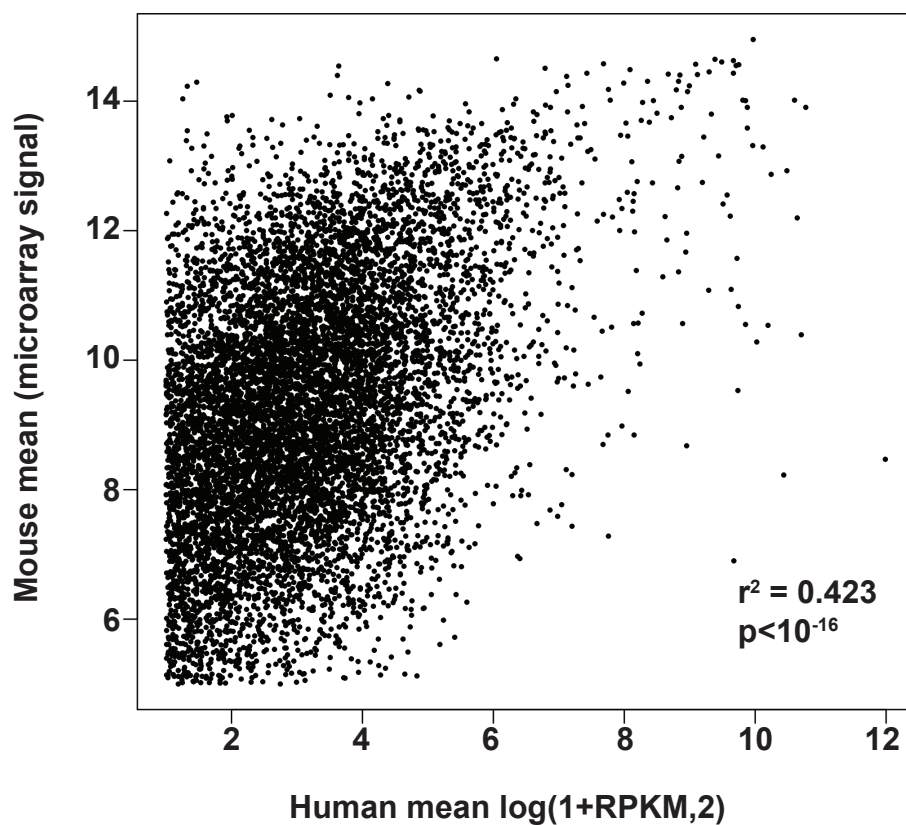

Supplement: supp [file elife_poa_e26575_Figure_2_figure_supplement_5.pdf › elife_poa_e26575_Figure_2_figure_supplement_5.pdf]
