# Supplementary material for: Human embryonic lung epithelial tips are multipotent progenitors that can be expanded in vitro as long-term self-renewing organoids
Source: eLife. 2017 Jun 30;6:e26575. doi: 10.7554/eLife.26575 (PMC5555721; doi:10.7554/eLife.26575)
Supplement: Supplementary file 1. — DOI: http://dx.doi.org/10.7554/eLife.26575.045 [file elife-26575-supp1.xlsx]

## Sheet: Signalling
EGF
TIP							STALK			FDR	RPKM	FC		BOTH			FDR	RPKM	FC
							ENSG00000178568	ERBB4	v-erb-a erythroblastic leukemia viral oncogene homolog 4 (avian)	2.62e-19	2.344	10.6527		ENSG00000141232	TOB1	transducer of ERBB2, 1	0.00198519	11.8205	1.78171
							ENSG00000019991	HGF	hepatocyte growth factor (hepapoietin A; scatter factor)	2.5e-05	2.71019	7.41213		ENSG00000078061	ARAF	v-raf murine sarcoma 3611 viral oncogene homolog	0.253904	2.04622	1.64028
							ENSG00000158458	NRG2	neuregulin 2	2.44e-05	0.8905	7.25573		ENSG00000183864	TOB2	transducer of ERBB2, 2	0.180339	14.1147	1.30887
							ENSG00000144749	LRIG1	leucine-rich repeats and immunoglobulin-like domains 1	2.04e-20	29.9173	3.81054		ENSG00000141736	ERBB2	v-erb-b2 erythroblastic leukemia viral oncogene homolog 2, neuro/glioblastoma derived oncogene homolog (avian)	0.252857	12.8903	1.24445
														ENSG00000146648	EGFR	epidermal growth factor receptor (erythroblastic leukemia viral (v-erb-b) oncogene homolog, avian)	0.549546	9.3286	1.21044
														ENSG00000065361	ERBB3	v-erb-b2 erythroblastic leukemia viral oncogene homolog 3 (avian)	0.519923	33.9665	1.14275
														ENSG00000157764	BRAF	v-raf murine sarcoma viral oncogene homolog B1	0.823966	10.3333	1.06528
														ENSG00000177885	GRB2	growth factor receptor-bound protein 2	0.908028	4.15742	1.06266
														ENSG00000132155	RAF1	v-raf-1 murine leukemia viral oncogene homolog 1	0.846517	21.9014	1.05212
FGF
TIP			FDR	RPKM	FC		STALK			FDR	RPKM	FC		BOTH			FDR	RPKM	FC
ENSG00000078579	FGF20	fibroblast growth factor 20	1.76e-31	8.57768	3833.51		ENSG00000114279	FGF12	fibroblast growth factor 12	5.26e-06	0.628636	5.66329		ENSG00000168939	SPRY3	sprouty homolog 3 (Drosophila)	0.0871324	0.28868	1.92738
ENSG00000102678	FGF9	fibroblast growth factor 9 (glia-activating factor)	3.03e-53	32.3097	26.4042		ENSG00000140285	FGF7	hypothetical LOC100132771; fibroblast growth factor 7 (keratinocyte growth factor); fibroblast growth factor 7 pseudogene 2	1.32e-06	0.444184	5.46675		ENSG00000077782	FGFR1	fibroblast growth factor receptor 1	0.00130899	6.2028	1.67954
ENSG00000160867	FGFR4	fibroblast growth factor receptor 4	2.5e-14	10.2156	5.14333									ENSG00000066468	FGFR2	fibroblast growth factor receptor 2	0.0371459	46.3196	1.67332
ENSG00000187678	SPRY4	sprouty homolog 4 (Drosophila)	3.87e-08	26.2847	4.33569									ENSG00000138685	FGF2	fibroblast growth factor 2 (basic)	0.162534	0.868964	1.62261
ENSG00000113578	FGF1	fibroblast growth factor 1 (acidic)	0.00297571	1.07638	3.19681									ENSG00000138675	FGF5	fibroblast growth factor 5	0.151841	1.17775	1.62094
ENSG00000136158	SPRY2	sprouty homolog 2 (Drosophila)	0.00090008	23.4065	2.06584									ENSG00000166225	FRS2	fibroblast growth factor receptor substrate 2	0.00521798	15.0124	1.52587
														ENSG00000164056	SPRY1	sprouty homolog 1, antagonist of FGF signaling (Drosophila)	0.568436	10.5706	1.35187
														ENSG00000129682	FGF13	fibroblast growth factor 13	0.45604	3.08754	1.34281
														ENSG00000068078	FGFR3	fibroblast growth factor receptor 3	0.275236	7.65689	1.3052
														ENSG00000161958	FGF11	fibroblast growth factor 11	0.520038	1.69027	1.2758
														ENSG00000137218	FRS3	fibroblast growth factor receptor substrate 3	0.622667	0.882068	1.26802
														ENSG00000156427	FGF18	fibroblast growth factor 18	0.0814177	2.40107	1.65505
														ENSG00000177885	GRB2	growth factor receptor-bound protein 2	0.908028	4.15742	1.06266
Hedgehog signalling
TIP			FDR	RPKM	FC		STALK			FDR	RPKM	FC		BOTH			FDR	RPKM	FC
ENSG00000163501	IHH	Indian hedgehog homolog (Drosophila)	1.11e-10	1.44147	17.843		ENSG00000164161	HHIP	hedgehog interacting protein	3.25e-10	35.1012	8.67597		ENSG00000154309	DISP1	dispatched homolog 1 (Drosophila)	0.00812082	2.84102	1.81805
ENSG00000117425	PTCH2	patched homolog 2 (Drosophila)	0.000918779	0.841657	3.2098									ENSG00000128602	SMO	smoothened homolog (Drosophila)	0.0123117	3.93156	1.77915
ENSG00000101162	TUBB1	tubulin, beta 1	0.0178033	1.2087	2.57892									ENSG00000198211	TUBB3	tubulin, beta 3; melanocortin 1 receptor (alpha melanocyte stimulating hormone receptor)	0.186255	4.12549	1.54303
														ENSG00000137379	TUBB	tubulin, beta; similar to tubulin, beta 5; tubulin, beta pseudogene 2; tubulin, beta pseudogene 1	0.0471724	540.738	1.52563
														ENSG00000196230	TUBB	tubulin, beta; similar to tubulin, beta 5; tubulin, beta pseudogene 2; tubulin, beta pseudogene 1	0.0471724	540.738	1.52563
														ENSG00000183311	TUBB	tubulin, beta; similar to tubulin, beta 5; tubulin, beta pseudogene 2; tubulin, beta pseudogene 1	0.0471724	540.738	1.52563
														ENSG00000166167	BTRC	beta-transducin repeat containing	0.0113884	7.38928	1.44104
														ENSG00000107882	SUFU	suppressor of fused homolog (Drosophila)	0.053743	11.2747	1.42448
														ENSG00000164690	SHH	sonic hedgehog homolog (Drosophila)	0.494353	1.49659	1.40226
														ENSG00000141551	CSNK1D	casein kinase 1, delta	0.421447	13.0379	1.17531
														ENSG00000151292	CSNK1G3	casein kinase 1, gamma 3	0.461033	11.1879	1.15861
														ENSG00000005339	CREBBP	CREB binding protein	0.499496	31.0216	1.1536
														ENSG00000113712	CSNK1A1	casein kinase 1, alpha 1	0.569276	36.9567	1.11288
														ENSG00000100393	EP300	E1A binding protein p300	0.727674	43.2711	1.08722
														ENSG00000072803	FBXW11	F-box and WD repeat domain containing 11	0.766941	20.5542	1.06532
														ENSG00000169118	CSNK1G1	casein kinase 1, gamma 1	0.880441	8.84415	1.04187
														ENSG00000133275	CSNK1G2	casein kinase 1, gamma 2	0.980696	3.42433	1.00992
Insulin/IGF pathway
TIP			FDR	RPKM	FC		STALK			FDR	RPKM	FC		Both			FDR	RPKM	FC
ENSG00000167779	IGFBP6	insulin-like growth factor binding protein 6	0.00264222	3.50734	2.97072		ENSG00000017427	IGF1	insulin-like growth factor 1 (somatomedin C)	6.28e-21	33.8	33.9606		ENSG00000137142	IGFBPL1	insulin-like growth factor binding protein-like 1	0.000565869	7.57833	1.83946
ENSG00000163453	IGFBP7	insulin-like growth factor binding protein 7	4.2e-05	73.5352	2.09887		ENSG00000115461	IGFBP5	insulin-like growth factor binding protein 5	3.56e-20	89.5901	4.24835		ENSG00000167244	IGF2	insulin-like growth factor 2 (somatomedin A); insulin; INS-IGF2 readthrough transcript	0.00362619	8.4938	1.77561
														ENSG00000129965	IGF2	insulin-like growth factor 2 (somatomedin A); insulin; INS-IGF2 readthrough transcript	0.00362619	8.4938	1.77561
														ENSG00000141753	IGFBP4	insulin-like growth factor binding protein 4	0.0843583	3.44966	1.68999
														ENSG00000159217	IGF2BP1	insulin-like growth factor 2 mRNA binding protein 1	0.0012571	31.6686	1.68931
														ENSG00000115457	IGFBP2	insulin-like growth factor binding protein 2, 36kDa	0.0144741	28.0862	1.68623
														ENSG00000146674	IGFBP3	insulin-like growth factor binding protein 3	0.407983	4.81415	1.39114
														ENSG00000185950	IRS2	insulin receptor substrate 2	0.476631	1.95075	1.29392
														ENSG00000171105	INSR	insulin receptor	0.249083	7.80414	1.27005
														ENSG00000145723	GIN1	gypsy retrotransposon integrase 1	0.616666	2.00005	1.19716
														ENSG00000198625	MDM4	Mdm4 p53 binding protein homolog (mouse)	0.551169	18.7902	1.12037
														ENSG00000197081	IGF2R	insulin-like growth factor 2 receptor	0.75879	17.5765	1.07135
														ENSG00000126767	ELK1	ELK1, member of ETS oncogene family	0.894088	3.3378	1.05149
														ENSG00000136231	IGF2BP3	insulin-like growth factor 2 mRNA binding protein 3	0.857026	28.6059	1.04133
														ENSG00000140443	IGF1R	insulin-like growth factor 1 receptor	0.881638	16.6585	1.04011
														ENSG00000140443	IGF1R	insulin-like growth factor 1 receptor	0.881638	16.6585	1.04011
														ENSG00000169047	IRS1	insulin receptor substrate 1	0.952305	9.15439	1.01822
														ENSG00000073792	IGF2BP2	insulin-like growth factor 2 mRNA binding protein 2	0.951288	33.0736	1.01483
Notch
TIP							STALK			FDR	RPKM	FC		BOTH			FDR	RPKM	FC
							ENSG00000072201	LNX1	ligand of numb-protein X 1	1.51e-18	5.89287	10.7587		ENSG00000114315	HES1	hairy and enhancer of split 1, (Drosophila)	0.0152968	57.939	1.84339
							ENSG00000173406	DAB1	disabled homolog 1 (Drosophila)	6.97e-11	4.26758	5.55678		ENSG00000134250	NOTCH2	Notch homolog 2 (Drosophila)	1.62e-05	23.5112	1.78537
							ENSG00000188290	HES4	hairy and enhancer of split 4 (Drosophila)	3.61e-05	1.86185	4.12145		ENSG00000069812	HES2	hairy and enhancer of split 2 (Drosophila)	0.202479	0.606295	1.66269
							ENSG00000144485	HES6	hairy and enhancer of split 6 (Drosophila)	8.5e-08	8.38543	4.08347		ENSG00000101384	JAG1	jagged 1 (Alagille syndrome)	0.126739	6.93826	1.3469
							ENSG00000128917	DLL4	delta-like 4 (Drosophila)	0.0103187	0.864971	3.22679		ENSG00000143801	PSEN2	presenilin 2 (Alzheimer disease 4)	0.53079	1.56679	1.33437
							ENSG00000107954	NEURL1	neuralized homolog (Drosophila)	0.0077766	0.490006	2.39167		ENSG00000133961	NUMB	numb homolog (Drosophila)	0.146279	23.0757	1.29133
							ENSG00000163909	HEYL	hairy/enhancer-of-split related with YRPW motif-like	0.00337983	2.9661	2.28873		ENSG00000169733	RFNG	RFNG O-fucosylpeptide 3-beta-N-acetylglucosaminyltransferase	0.593561	3.14491	1.25871
							ENSG00000105245	NUMBL	numb homolog (Drosophila)-like	0.0125394	1.48085	2.23544		ENSG00000074181	NOTCH3	Notch homolog 3 (Drosophila)	0.342343	16.3291	1.21865
														ENSG00000080815	PSEN1	presenilin 1	0.44979	10.5482	1.16816
														ENSG00000168214	RBPJ	recombination signal binding protein for immunoglobulin kappa J region	0.52603	28.883	1.14217
														ENSG00000148400	NOTCH1	Notch homolog 1, translocation-associated (Drosophila)	0.651793	9.37559	1.10198
														ENSG00000151694	ADAM17	ADAM metallopeptidase domain 17	0.743656	13.9707	1.07928
														ENSG00000137845	ADAM10	ADAM metallopeptidase domain 10	0.845887	28.2138	1.04526
Retinoic acid
TIP			FDR	RPKM	FC		STALK			FDR	RPKM	FC		BOTH			FDR	RPKM	FC
ENSG00000137868	STA6	stimulated by retinoic acid gene 6	3.78e-08	11.2571	4.73176		ENSG00000077092	RARB	retinoic acid receptor, beta	0.000137278	8.94775	2.65691		ENSG00000143320	CRABP2	cellular retinoic acid binding protein 2	1.08e-05	37.3953	1.99028
ENSG00000143320	CRABP2	cellular retinoic acid binding protein 2	1.08e-05	49.806	1.99028		ENSG00000069667	RORA	RAR-related orphan receptor A	0.00514008	4.28804	2.1054		ENSG00000172819	RARG	retinoic acid receptor, gamma	0.515213	3.10476	1.23731
														ENSG00000131759	RARA	retinoic acid receptor, alpha	0.505471	3.5484	1.21897
														ENSG00000186350	RXRA	retinoid X receptor, alpha	0.806374	5.32622	1.07407
														ENSG00000108557	RAI1	retinoic acid induced 1	0.815626	7.20088	1.06177
														ENSG00000206289	RXRB	retinoid X receptor, beta	0.975418	9.99441	1.01015
TGF beta
TIP			FDR	RPKM	FC		STALK			FDR	RPKM	FC		BOTH			FDR	RPKM	FC
ENSG00000135409	AMHR2	anti-Mullerian hormone receptor, type II	5.32e-16	2.69292	39.0826		ENSG00000038295	TLL1	tolloid-like 1	8.16e-45	5.28706	508.591		ENSG00000101665	SMAD7	SMAD family member 7	0.00136481	11.6955	1.97208
ENSG00000092969	TGFB2	transforming growth factor, beta 2	3.23e-25	121.56	5.84178		ENSG00000168843	FSTL5	follistatin-like 5	3.47e-27	7.95391	84.3089		ENSG00000163513	TGFBR2	transforming growth factor, beta receptor II (70/80kDa)	2.21e-07	25.8287	1.95583
ENSG00000095739	BAMBI	hypothetical LOC729590; BMP and activin membrane-bound inhibitor homolog (Xenopus laevis)	1.23e-11	21.3751	4.36818		ENSG00000152785	BMP3	bone morphogenetic protein 3	1.19e-78	56.2674	25.2904		ENSG00000137834	SMAD6	SMAD family member 6	0.0207497	2.47102	1.8962
ENSG00000101144	BMP7	bone morphogenetic protein 7	4.1e-06	8.70509	2.3639		ENSG00000130513	GDF15	growth differentiation factor 15	9.65e-18	15.7542	21.8703		ENSG00000115170	ACVR1	activin A receptor, type I	0.00107205	8.04261	1.80452
ENSG00000125845	BMP2	bone morphogenetic protein 2	0.00888812	2.61738	2.26421		ENSG00000139567	ACVRL1	activin A receptor type II-like 1	4.23e-07	1.4065	7.36792		ENSG00000204217	BMPR2	bone morphogenetic protein receptor, type II (serine/threonine kinase)	0.00117525	23.0495	1.63164
							ENSG00000140682	TGFB1I1	transforming growth factor beta 1 induced transcript 1	1.64e-12	12.3854	5.62241		ENSG00000168487	BMP1	bone morphogenetic protein 1	0.261666	3.56114	1.50379
							ENSG00000134363	FST	follistatin	0.00172151	4.95723	5.23133		ENSG00000105329	TGFB1	transforming growth factor, beta 1	0.433712	0.601628	1.47806
							ENSG00000070404	FSTL3	follistatin-like 3 (secreted glycoprotein)	3.75e-06	1.65073	4.54316		ENSG00000151065	DCP1B	DCP1 decapping enzyme homolog B (S. cerevisiae)	0.0220209	15.9695	1.4731
							ENSG00000138696	BMPR1B	bone morphogenetic protein receptor, type IB	0.000299471	2.25683	3.15319		ENSG00000135414	GDF11	growth differentiation factor 11	0.0214392	11.5706	1.44824
							ENSG00000112175	BMP5	bone morphogenetic protein 5	0.00020619	6.6323	2.49737		ENSG00000166949	SMAD3	SMAD family member 3	0.0186561	23.9308	1.40951
							ENSG00000163430	FSTL1	follistatin-like 1	5.64e-08	90.2383	2.39556		ENSG00000106799	TGFBR1	transforming growth factor, beta receptor 1	0.0407183	17.1955	1.33564
														ENSG00000141646	SMAD4	SMAD family member 4	0.059167	18.1459	1.32601
														ENSG00000069702	TGFBR3	transforming growth factor, beta receptor III	0.275077	5.14922	1.31523
														ENSG00000135503	ACVR1B	activin A receptor, type IB	0.301842	14.0159	1.30227
														ENSG00000113658	SMAD5	SMAD family member 5	0.0974899	18.1453	1.28002
														ENSG00000115966	ATF2	activating transcription factor 2	0.490202	102.407	1.27936
														ENSG00000114739	ACVR2B	activin A receptor, type IIB	0.209351	24.6839	1.2588
														ENSG00000116985	BMP8B	bone morphogenetic protein 8b	0.690791	0.557753	1.22232
														ENSG00000163083	INHBB	inhibin, beta B	0.748778	0.753734	1.19582
														ENSG00000121989	ACVR2A	activin A receptor, type IIA	0.639554	54.4819	1.18923
														ENSG00000162290	DCP1A	DCP1 decapping enzyme homolog A (S. cerevisiae)	0.479835	16.6773	1.15089
														ENSG00000120693	SMAD9	SMAD family member 9	0.716961	7.38827	1.10231
														ENSG00000153162	BMP6	bone morphogenetic protein 6	0.831164	1.62797	1.09953
														ENSG00000100393	EP300	E1A binding protein p300	0.727674	43.2711	1.08722
														ENSG00000170365	SMAD1	SMAD family member 1	0.773249	12.2775	1.07611
														ENSG00000157077	ZFYVE9	zinc finger, FYVE domain containing 9	0.775766	11.0412	1.0715
														ENSG00000119699	TGFB3	transforming growth factor, beta 3	0.805536	65.5598	1.06784
														ENSG00000175387	SMAD2	SMAD family member 2	0.814693	11.7022	1.052
														ENSG00000135966	TGFBRAP1	transforming growth factor, beta receptor associated protein 1	0.946673	7.17118	1.02346
														ENSG00000125378	BMP4	bone morphogenetic protein 4	1.15208	15.6956	0.69971
Wnt signalling
TIP			FDR	RPKM	FC		STALK			FDR	RPKM	FC		BOTH			FDR	RPKM	FC
ENSG00000139292	LGR5	leucine-rich repeat-containing G protein-coupled receptor 5	1.45e-18	3.26494	10.3359		ENSG00000107736	CDH23	cadherin-like 23	2.49e-06	1.29239	10.6835		ENSG00000214574	PCDHGA8	protocadherin gamma subfamily A, 8	0.126326	0.439441	1.92416
ENSG00000188064	WNT7B	wingless-type MMTV integration site family, member 7B	2.13e-19	50.4094	7.73542		ENSG00000145423	SFRP2	secreted frizzled-related protein 2	9.08e-09	3.59894	6.89874		ENSG00000113209	PCDHB5	protocadherin beta 5	0.0816469	1.10621	1.89241
ENSG00000156076	WIF1	WNT inhibitory factor 1	2.24e-09	41.9817	6.78187		ENSG00000134245	WNT2B	wingless-type MMTV integration site family, member 2B	0.000162783	2.15888	6.54434		ENSG00000214583	PCDHGB3	protocadherin gamma subfamily B, 3	0.0871605	1.16827	1.85257
ENSG00000119326	CTNNAL1	catenin (cadherin-associated protein), alpha-like 1	8.97e-22	37.3927	4.29558		ENSG00000114251	WNT5A	wingless-type MMTV integration site family, member 5A	7.04e-08	8.04235	4.77039		ENSG00000059769	GNG10	DnaJ (Hsp40) homolog, subfamily C , member 25; guanine nucleotide binding protein (G protein), gamma 10; DNAJC25-GNG10 readthrough transcript	0.00111739	19.0079	1.80446
ENSG00000154162	CDH12	cadherin 12, type 2 (N-cadherin 2)	3.4e-14	9.18944	4.15131		ENSG00000183762	KREMEN1	kringle containing transmembrane protein 1	4.44e-24	25.5938	4.73342		ENSG00000184226	PCDH9	protocadherin 9	0.0182251	3.19794	1.70685
ENSG00000164488	DACT2	dapper, antagonist of beta-catenin, homolog 2 (Xenopus laevis)	2.21e-08	7.75795	4.00552		ENSG00000205213	LGR4	leucine-rich repeat-containing G protein-coupled receptor 4	6.8e-06	4.23605	4.69343		ENSG00000165323	FAT3	FAT tumor suppressor homolog 3 (Drosophila)	0.00200333	9.52559	1.67177
ENSG00000102290	PCDH11X	protocadherin 11 X-linked	0.00165748	0.73882	3.23026		ENSG00000120324	PCDHB10	protocadherin beta 10; protocadherin beta 9	0.000276966	1.14406	4.22359		ENSG00000166869	CHP2	calcineurin B homologous protein 2	0.175847	1.35275	1.63693
ENSG00000138795	LEF1	lymphoid enhancer-binding factor 1	3.13e-08	26.6205	2.48268		ENSG00000111186	WNT5B	wingless-type MMTV integration site family, member 5B	6.14e-05	1.14691	3.72836		ENSG00000196159	FAT4	FAT tumor suppressor homolog 4 (Drosophila)	0.0213145	18.2458	1.4826
ENSG00000145244	CORIN	corin, serine peptidase	0.0387265	0.424476	2.263		ENSG00000162552	WNT4	wingless-type MMTV integration site family, member 4	0.0222473	1.54292	3.43269		ENSG00000166167	BTRC	beta-transducin repeat containing	0.0113884	7.38928	1.44104
							ENSG00000085741	WNT11	wingless-type MMTV integration site family, member 11	0.000619661	9.76429	3.11172		ENSG00000107404	DVL1	dishevelled, dsh homolog 1 (Drosophila); dishevelled, dsh homolog 1 (Drosophila)-like 1	0.256058	2.37066	1.41342
							ENSG00000075275	CELSR1	cadherin, EGF LAG seven-pass G-type receptor 1 (flamingo homolog, Drosophila)	2.08e-12	10.9669	3.05834		ENSG00000156453	PCDH1	protocadherin 1	0.264583	2.23855	1.40862
							ENSG00000108379	WNT3	wingless-type MMTV integration site family, member 3	0.00396269	2.45266	2.5649		ENSG00000204961	PCDHA9	protocadherin alpha 9	0.462846	0.426404	1.38417
							ENSG00000104332	SFRP1	secreted frizzled-related protein 1	0.00290076	5.45706	2.35977		ENSG00000118946	PCDH17	protocadherin 17	0.0817037	5.34497	1.3837
														ENSG00000039068	CDH1	cadherin 1, type 1, E-cadherin (epithelial)	0.101864	79.2225	1.36546
														ENSG00000099715	PCDH11Y	protocadherin 11 Y-linked	0.292475	1.18677	1.23914
														ENSG00000143126	CELSR2	cadherin, EGF LAG seven-pass G-type receptor 2 (flamingo homolog, Drosophila)	0.285368	4.39732	1.23779
														ENSG00000180340	FZD2	frizzled homolog 2 (Drosophila)	0.308176	54.4193	1.20434
														ENSG00000101266	CSNK2A1	casein kinase 2, alpha 1 polypeptide pseudogene; casein kinase 2, alpha 1 polypeptide	0.30011	50.088	1.19379
														ENSG00000070770	CSNK2A2	casein kinase 2, alpha prime polypeptide	0.363705	58.318	1.18308
														ENSG00000141551	CSNK1D	casein kinase 1, delta	0.421447	13.0379	1.17531
														ENSG00000213923	CSNK1E	casein kinase 1, epsilon	0.44028	21.6918	1.17458
														ENSG00000105723	GSK3A	glycogen synthase kinase 3 alpha	0.466176	16.4417	1.16697
														ENSG00000059769	DNAJC25	DnaJ (Hsp40) homolog, subfamily C , member 25; guanine nucleotide binding protein (G protein), gamma 10; DNAJC25-GNG10 readthrough transcript	0.720147	2.52733	1.16343
														ENSG00000151292	CSNK1G3	casein kinase 1, gamma 3	0.461033	11.1879	1.15861
														ENSG00000161202	DVL3	dishevelled, dsh homolog 3 (Drosophila)	0.454208	31.223	1.15032
														ENSG00000168036	CTNNB1	catenin (cadherin-associated protein), beta 1, 88kDa	0.5374	64.188	1.13799
														ENSG00000008300	SLC26A6	solute carrier family 26, member 6; cadherin, EGF LAG seven-pass G-type receptor 3 (flamingo homolog, Drosophila)	0.794154	1.11346	1.13772
														ENSG00000082701	GSK3B	glycogen synthase kinase 3 beta	0.617726	36.8081	1.11336
														ENSG00000113712	CSNK1A1	casein kinase 1, alpha 1	0.569276	36.9567	1.11288
														ENSG00000087095	NLK	nemo-like kinase	0.639554	18.7597	1.10848
														ENSG00000169218	RSPO1	R-spondin homolog (Xenopus laevis)	0.798017	3.24735	1.10479
														ENSG00000062038	CDH3	cadherin 3, type 1, P-cadherin (placental)	0.629993	23.8595	1.09799
														ENSG00000100393	EP300	E1A binding protein p300	0.727674	43.2711	1.08722
														ENSG00000004975	DVL2	dishevelled, dsh homolog 2 (Drosophila)	0.798557	5.1823	1.08007
														ENSG00000139880	CDH24	cadherin-like 24	0.892189	1.50804	1.07303
														ENSG00000112033	PPARD	peroxisome proliferator-activated receptor delta	0.836816	4.66119	1.07025
														ENSG00000072803	FBXW11	F-box and WD repeat domain containing 11	0.766941	20.5542	1.06532
														ENSG00000083857	FAT1	FAT tumor suppressor homolog 1 (Drosophila)	0.861101	70.7534	1.05406
														ENSG00000169118	CSNK1G1	casein kinase 1, gamma 1	0.880441	8.84415	1.04187
														ENSG00000133275	CSNK1G2	casein kinase 1, gamma 2	0.980696	3.42433	1.00992
														ENSG00000120324	PCDHB9	protocadherin beta 10; protocadherin beta 9	0.99523	0.864459	1.00317
Neuro/neuroendocrine
TIP			FDR	RPKM	FC		STALK			FDR	RPKM	FC		Both			FDR	RPKM	FC
ENSG00000187764	SEMA4D	sema domain, immunoglobulin domain (Ig), transmembrane domain (TM) and short cytoplasmic domain, (semaphorin) 4D	0.210337	1.65899	1.63788		ENSG00000147571	CRH	corticotropin releasing hormone	3.98e-21	2.90554	87.7746		ENSG00000152413	HOMER1	homer homolog 1 (Drosophila)	0.000845922	6.48588	1.91058
							ENSG00000163873	GRIK3	glutamate receptor, ionotropic, kainate 3	3.06e-15	0.886913	51.5661		ENSG00000175416	CLTB	clathrin, light chain (Lcb)	0.0503075	4.23445	1.8849
							ENSG00000198626	RYR2	ryanodine receptor 2 (cardiac)	9.34e-20	0.386099	46.3007		ENSG00000166900	STX3	syntaxin 3	0.00991662	2.54236	1.86536
							ENSG00000082556	OPRK1	opioid receptor, kappa 1	2.8e-67	8.50382	41.5891		ENSG00000118432	CNR1	cannabinoid receptor 1 (brain)	0.278336	0.509571	1.80726
							ENSG00000164418	GRIK2	glutamate receptor, ionotropic, kainate 2	6.43e-22	1.80221	29.3967		ENSG00000110400	PVRL1	poliovirus receptor-related 1 (herpesvirus entry mediator C)	0.0235505	8.32332	1.80551
							ENSG00000165731	RET	ret proto-oncogene	2.47e-16	0.75809	26.982		ENSG00000100288	CPT1B	choline kinase beta; carnitine palmitoyltransferase 1B (muscle)	0.131822	3.51737	1.76668
							ENSG00000079215	SLC1A3	solute carrier family 1 (glial high affinity glutamate transporter), member 3	5.8e-18	1.14726	25.6694		ENSG00000205560	CPT1B	choline kinase beta; carnitine palmitoyltransferase 1B (muscle)	0.131822	3.51737	1.76668
							ENSG00000114200	BCHE	butyrylcholinesterase	2.3e-24	11.1008	22.4544		ENSG00000142192	APP	amyloid beta (A4) precursor protein	0.00833209	304.636	1.73642
							ENSG00000125851	PCSK2	proprotein convertase subtilisin/kexin type 2	4.92e-11	1.0193	17.6486		ENSG00000177606	JUN	jun oncogene	0.0117366	59.2449	1.69124
							ENSG00000221866	PLXNA4	plexin A4	1.13e-17	2.91709	16.4761		ENSG00000010810	FYN	FYN oncogene related to SRC, FGR, YES	0.150158	3.19692	1.6745
							ENSG00000153993	SEMA3D	sema domain, immunoglobulin domain (Ig), short basic domain, secreted, (semaphorin) 3D	7.05e-25	2.70106	12.1221		ENSG00000164050	PLXNB1	plexin B1	0.00332594	7.67622	1.6615
							ENSG00000064300	NGFR	nerve growth factor receptor (TNFR superfamily, member 16)	2.73e-11	2.00772	11.411		ENSG00000120907	ADRA1A	adrenergic, alpha-1A-, receptor	0.194529	0.912966	1.65293
							ENSG00000175426	PCSK1	proprotein convertase subtilisin/kexin type 1	3.79e-07	0.882567	10.9024		ENSG00000144824	PLCXD2	pleckstrin homology-like domain, family B, member 2; phosphatidylinositol-specific phospholipase C, X domain containing 2	0.0483764	4.67954	1.64719
							ENSG00000179603	GRM8	glutamate receptor, metabotropic 8	1.02e-08	2.43169	8.33582		ENSG00000051128	HOMER3	homer homolog 3 (Drosophila)	0.152171	3.71351	1.64054
							ENSG00000132639	SNAP25	synaptosomal-associated protein, 25kDa	3.64e-05	3.0749	5.82861		ENSG00000187764	SEMA4D	sema domain, immunoglobulin domain (Ig), transmembrane domain (TM) and short cytoplasmic domain, (semaphorin) 4D	0.210337	1.3245	1.63788
							ENSG00000117971	CHRNB4	cholinergic receptor, nicotinic, beta 4	2.14e-05	1.46072	4.85192		ENSG00000188091	SEMA4D	sema domain, immunoglobulin domain (Ig), transmembrane domain (TM) and short cytoplasmic domain, (semaphorin) 4D	0.210337	1.3245	1.63788
							ENSG00000185008	ROBO2	roundabout, axon guidance receptor, homolog 2 (Drosophila)	4.51e-09	12.4068	4.84113		ENSG00000099139	PCSK5	proprotein convertase subtilisin/kexin type 5	0.0464955	5.19007	1.58832
							ENSG00000080644	CHRNA3	cholinergic receptor, nicotinic, alpha 3	0.000448194	2.54184	4.76523		ENSG00000118640	VAMP8	vesicle-associated membrane protein 8 (endobrevin)	0.126697	12.0005	1.58112
							ENSG00000137766	UNC13C	unc-13 homolog C (C. elegans)	1.57e-08	4.72228	4.72841		ENSG00000197283	SYNGAP1	synaptic Ras GTPase activating protein 1 homolog (rat)	0.0186568	6.11123	1.53503
							ENSG00000161681	SHANK1	SH3 and multiple ankyrin repeat domains 1	2.24e-05	0.341108	3.88454		ENSG00000197386	HTT	huntingtin	0.00852169	7.95303	1.53103
							ENSG00000169169	CPT1C	carnitine palmitoyltransferase 1C	0.00264222	1.06988	3.72703		ENSG00000173020	ADRBK1	adrenergic, beta, receptor kinase 1	0.210916	1.26285	1.52464
							ENSG00000099250	NRP1	neuropilin 1	2.97e-11	8.72566	3.52068		ENSG00000019144	PHLDB1	pleckstrin homology-like domain, family B, member 1	0.012453	6.04998	1.5165
							ENSG00000099250	NRP1	neuropilin 1	2.97e-11	8.72566	3.52068		ENSG00000107731	UNC5B	unc-5 homolog B (C. elegans)	0.398009	0.525857	1.4782
							ENSG00000182240	BACE2	beta-site APP-cleaving enzyme 2	4.98e-09	3.689	3.36115		ENSG00000106089	STX1A	syntaxin 1A (brain)	0.429675	0.937715	1.47265
							ENSG00000139190	VAMP1	vesicle-associated membrane protein 1 (synaptobrevin 1)	0.000444869	2.29277	3.24353		ENSG00000049246	PER3	period homolog 3 (Drosophila)	0.129296	4.32349	1.46314
							ENSG00000123454	DBH	dopamine beta-hydroxylase (dopamine beta-monooxygenase)	0.00241716	0.645837	3.13944		ENSG00000166167	BTRC	beta-transducin repeat containing	0.0113884	7.38928	1.44104
							ENSG00000159082	SYNJ1	synaptojanin 1	2.2e-10	5.54362	3.05912		ENSG00000143858	SYT2	synaptotagmin II	0.243009	2.52157	1.43599
							ENSG00000076356	PLXNA2	plexin A2	3.32e-07	5.1289	2.74412		ENSG00000114541	FRMD4B	FERM domain containing 4B	0.0171553	16.8359	1.42833
							ENSG00000169855	ROBO1	roundabout, axon guidance receptor, homolog 1 (Drosophila); similar to roundabout 1 isoform b	2.65e-12	35.3939	2.57334		ENSG00000073969	NSF	N-ethylmaleimide-sensitive factor	0.0728003	6.84752	1.4051
							ENSG00000198838	RYR3	ryanodine receptor 3	0.00237113	0.478479	2.54124		ENSG00000108953	YWHAE	similar to 14-3-3 protein epsilon (14-3-3E) (Mitochondrial import stimulation factor L subunit) (MSF L); tyrosine 3-monooxygenase/tryptophan 5-monooxygenase activation protein, epsilon polypeptide	0.0756504	361.676	1.38581
							ENSG00000120903	CHRNA2	cholinergic receptor, nicotinic, alpha 2 (neuronal)	0.00778922	0.997077	2.52773		ENSG00000132326	PER2	period homolog 2 (Drosophila)	0.0926888	4.44026	1.38316
							ENSG00000180914	OXTR	oxytocin receptor	0.00266446	2.958	2.44205		ENSG00000135914	HTR2B	5-hydroxytryptamine (serotonin) receptor 2B	0.575484	0.898727	1.37388
							ENSG00000110171	TRIM3	tripartite motif-containing 3	0.0256687	1.03957	2.31135		ENSG00000126247	CAPNS1	calpain, small subunit 1	0.368141	21.1899	1.36317
							ENSG00000178607	ERN1	endoplasmic reticulum to nucleus signaling 1	5.97e-05	6.12844	2.26453		ENSG00000113262	GRM6	glutamate receptor, metabotropic 6	0.455457	0.779337	1.36031
							ENSG00000182168	UNC5C	unc-5 homolog C (C. elegans)	0.000207045	9.41642	2.25765		ENSG00000179094	PER1	period homolog 1 (Drosophila)	0.428201	1.44636	1.3566
							ENSG00000187122	SLIT1	slit homolog 1 (Drosophila)	0.000725905	1.79578	2.25245		ENSG00000173801	JUP	junction plakoglobin	0.0705879	14.5028	1.34064
							ENSG00000075213	SEMA3A	sema domain, immunoglobulin domain (Ig), short basic domain, secreted, (semaphorin) 3A	1.21e-06	8.83592	2.19548		ENSG00000143801	PSEN2	presenilin 2 (Alzheimer disease 4)	0.53079	1.56679	1.33437
														ENSG00000100151	PICK1	protein interacting with PRKCA 1	0.320596	4.51621	1.31857
														ENSG00000079950	STX7	syntaxin 7	0.0968489	23.0467	1.31615
														ENSG00000100077	ADRBK2	adrenergic, beta, receptor kinase 2	0.120549	4.74452	1.3155
														ENSG00000173848	NET1	neuroepithelial cell transforming 1	0.513695	3.13196	1.31002
														ENSG00000220205	VAMP2	vesicle-associated membrane protein 2 (synaptobrevin 2)	0.196451	13.6131	1.30666
														ENSG00000179036	VAMP2	vesicle-associated membrane protein 2 (synaptobrevin 2)	0.196451	13.6131	1.30666
														ENSG00000182472	CAPN12	calpain 12	0.394791	4.74096	1.28597
														ENSG00000100288	CHKB	choline kinase beta; carnitine palmitoyltransferase 1B (muscle)	0.252881	16.0827	1.28343
														ENSG00000205560	CHKB	choline kinase beta; carnitine palmitoyltransferase 1B (muscle)	0.252881	16.0827	1.28343
														ENSG00000008056	SYN1	synapsin I	0.534264	1.50005	1.28257
														ENSG00000150594	ADRA2A	adrenergic, alpha-2A-, receptor	0.732864	0.87278	1.27976
														ENSG00000196961	AP2A1	adaptor-related protein complex 2, alpha 1 subunit	0.378382	3.16023	1.27197
														ENSG00000130830	MPP1	membrane protein, palmitoylated 1, 55kDa	0.695802	1.46002	1.26898
														ENSG00000151532	VTI1A	vesicle transport through interaction with t-SNAREs homolog 1A (yeast)	0.409378	5.07593	1.24681
														ENSG00000130396	MLLT4	similar to Afadin (Protein AF-6); myeloid/lymphoid or mixed-lineage leukemia (trithorax homolog, Drosophila); translocated to, 4	0.255329	27.9627	1.23632
														ENSG00000162105	SHANK2	SH3 and multiple ankyrin repeat domains 2	0.246634	9.15317	1.21875
														ENSG00000183020	AP2A2	adaptor-related protein complex 2, alpha 2 subunit	0.423836	6.2565	1.20238
														ENSG00000130147	SH3BP4	SH3-domain binding protein 4	0.455457	11.2585	1.19556
														ENSG00000130827	PLXNA3	plexin A3	0.478242	3.91875	1.18361
														ENSG00000140564	FURIN	furin (paired basic amino acid cleaving enzyme)	0.4932	6.81393	1.18113
														ENSG00000080815	PSEN1	presenilin 1	0.44979	10.5482	1.16816
														ENSG00000132535	DLG4	discs, large homolog 4 (Drosophila)	0.559232	4.62061	1.16723
														ENSG00000144824	PHLDB2	pleckstrin homology-like domain, family B, member 2; phosphatidylinositol-specific phospholipase C, X domain containing 2	0.495635	11.5505	1.15912
														ENSG00000140479	PCSK6	proprotein convertase subtilisin/kexin type 6	0.745434	1.07235	1.15699
														ENSG00000092531	SNAP23	synaptosomal-associated protein, 23kDa	0.54297	11.7307	1.15227
														ENSG00000116032	GRIN3B	glutamate receptor, ionotropic, N-methyl-D-aspartate 3B	0.718836	2.23095	1.14709
														ENSG00000204681	GABBR1	gamma-aminobutyric acid (GABA) B receptor, 1	0.517018	11.4614	1.14168
														ENSG00000206466	GABBR1	gamma-aminobutyric acid (GABA) B receptor, 1	0.517018	11.4614	1.14168
														ENSG00000206511	GABBR1	gamma-aminobutyric acid (GABA) B receptor, 1	0.517018	11.4614	1.14168
														ENSG00000099940	SNAP29	synaptosomal-associated protein, 29kDa	0.682991	6.39245	1.1377
														ENSG00000170175	CHRNB1	cholinergic receptor, nicotinic, beta 1 (muscle)	0.744392	2.87385	1.13645
														ENSG00000171877	FRMD5	FERM domain containing 5	0.811738	1.05934	1.13431
														ENSG00000008323	PLEKHG6	pleckstrin homology domain containing, family G (with RhoGef domain) member 6	0.818353	0.593063	1.1326
														ENSG00000111450	STX2	syntaxin 2	0.670768	8.47444	1.12662
														ENSG00000178719	GRINA	glutamate receptor, ionotropic, N-methyl D-aspartate-associated protein 1 (glutamate binding)	0.673584	9.80756	1.12461
														ENSG00000142330	CAPN10	calpain 10	0.819007	1.62834	1.115
														ENSG00000099882	SHANK3	SH3 and multiple ankyrin repeat domains 3	0.838139	0.422589	1.11174
														ENSG00000055163	CYFIP2	cytoplasmic FMR1 interacting protein 2	0.620194	13.311	1.10602
														ENSG00000213705	GNAS	GNAS complex locus	0.724387	864.161	1.10509
														ENSG00000087460	GNAS	GNAS complex locus	0.724387	864.161	1.10509
														ENSG00000133019	CHRM3	cholinergic receptor, muscarinic 3	0.798994	3.48957	1.10051
														ENSG00000152578	GRIA4	glutamate receptor, ionotrophic, AMPA 4	0.902723	0.312116	1.08769
														ENSG00000100393	EP300	E1A binding protein p300	0.727674	43.2711	1.08722
														ENSG00000136238	RAC1	ras-related C3 botulinum toxin substrate 1 (rho family, small GTP binding protein Rac1)	0.718039	92.7803	1.08313
														ENSG00000169684	CHRNA5	cholinergic receptor, nicotinic, alpha 5	0.849124	3.17259	1.07648
														ENSG00000105737	GRIK5	glutamate receptor, ionotropic, kainate 5	0.877595	2.24499	1.07438
														ENSG00000014216	CAPN1	calpain 1, (mu/I) large subunit	0.830131	6.87515	1.06961
														ENSG00000072803	FBXW11	F-box and WD repeat domain containing 11	0.766941	20.5542	1.06532
														ENSG00000110090	CPT1A	carnitine palmitoyltransferase 1A (liver)	0.895681	1.68899	1.05439
														ENSG00000126767	ELK1	ELK1, member of ETS oncogene family	0.894088	3.3378	1.05149
														ENSG00000067141	NEO1	neogenin homolog 1 (chicken)	0.862304	33.0482	1.0465
														ENSG00000114554	PLXNA1	plexin A1	0.879735	5.60496	1.04202
														ENSG00000183454	GRIN2A	glutamate receptor, ionotropic, N-methyl D-aspartate 2A	0.955365	0.11629	1.03807
														ENSG00000149260	CAPN5	calpain 5	0.924745	3.89366	1.03503
														ENSG00000068793	CYFIP1	cytoplasmic FMR1 interacting protein 1	0.965056	4.33288	1.0223
														ENSG00000145147	SLIT2	slit homolog 2 (Drosophila)	0.947206	12.6247	1.02043
														ENSG00000171680	PLEKHG5	pleckstrin homology domain containing, family G (with RhoGef domain) member 5	0.984879	2.75247	1.01184
														ENSG00000136854	STXBP1	syntaxin binding protein 1	0.981855	7.10564	1.00859
														ENSG00000074527	NTN4	netrin 4	0.98988	2.38901	1.00523
														ENSG00000049245	VAMP3	vesicle-associated membrane protein 3 (cellubrevin)	0.986255	30.0555	1.00478
G-Protein signalling
TIP			FDR	RPKM	FC		STALK			FDR	RPKM	FC		BOTH			FDR	RPKM	FC
ENSG00000155897	ADCY8	adenylate cyclase 8 (brain)	2.28e-45	2.53151	508.901		ENSG00000117152	RGS4	regulator of G-protein signaling 4	3.63e-18	1.27671	76.6329		ENSG00000131584	ACAP3	ArfGAP with coiled-coil, ankyrin repeat and PH domains 3	0.0868772	0.544638	1.94478
ENSG00000152689	RASGRP3	RAS guanyl releasing protein 3 (calcium and DAG-regulated)	2.37e-34	7.63616	23.9345		ENSG00000165731	RET	ret proto-oncogene	2.47e-16	0.75809	26.982		ENSG00000175416	CLTB	clathrin, light chain (Lcb)	0.0503075	4.23445	1.8849
ENSG00000143333	RGS16	regulator of G-protein signaling 16	5.04e-09	3.74833	5.79975		ENSG00000087258	GNAO1	guanine nucleotide binding protein (G protein), alpha activating activity polypeptide O	6.26e-07	0.948656	9.93339		ENSG00000168243	GNG4	guanine nucleotide binding protein (G protein), gamma 4	0.0222504	1.6959	1.87952
ENSG00000076864	RAP1GAP	RAP1 GTPase activating protein	2.86e-11	5.35768	4.66722		ENSG00000173175	ADCY5	adenylate cyclase 5	1.01e-06	0.883488	6.37863		ENSG00000101333	PLCB4	phospholipase C, beta 4	0.000270037	11.3897	1.86885
ENSG00000127588	GNG13	guanine nucleotide binding protein (G protein), gamma 13	0.0099609	1.32643	2.40252		ENSG00000116741	RGS2	regulator of G-protein signaling 2, 24kDa	3.94e-20	51.9282	5.12439		ENSG00000069966	GNB5	guanine nucleotide binding protein (G protein), beta 5	0.0334501	2.51332	1.86369
ENSG00000120457	KCNJ5	potassium inwardly-rectifying channel, subfamily J, member 5	0.00538861	2.18363	2.30147		ENSG00000182621	PLCB1	phospholipase C, beta 1 (phosphoinositide-specific)	1.91e-12	3.20219	4.85077		ENSG00000059769	GNG10	DnaJ (Hsp40) homolog, subfamily C , member 25; guanine nucleotide binding protein (G protein), gamma 10; DNAJC25-GNG10 readthrough transcript	0.00111739	19.0079	1.80446
							ENSG00000172380	GNG12	guanine nucleotide binding protein (G protein), gamma 12	3.28e-09	8.81886	3.45069		ENSG00000163947	ARHGEF3	Rho guanine nucleotide exchange factor (GEF) 3	0.175209	4.79341	1.79814
							ENSG00000137841	PLCB2	phospholipase C, beta 2	0.00174107	0.587314	2.79927		ENSG00000171700	RGS19	regulator of G-protein signaling 19	0.246687	1.23948	1.69017
							ENSG00000100504	PYGL	phosphorylase, glycogen, liver	1.28e-05	5.01869	2.6046		ENSG00000109762	SNX25	sorting nexin 25	0.01657	5.91464	1.67953
							ENSG00000136895	GARNL3	GTPase activating Rap/RanGAP domain-like 3	0.000756185	2.72575	2.38203		ENSG00000162104	ADCY9	adenylate cyclase 9	0.142089	0.972482	1.64706
							ENSG00000121281	ADCY7	adenylate cyclase 7	9.74e-07	7.74133	2.08617		ENSG00000137486	ARRB1	arrestin, beta 1	0.00326421	8.8163	1.63301
														ENSG00000076928	ARHGEF1	Rho guanine nucleotide exchange factor (GEF) 1	0.0532987	3.42788	1.57556
														ENSG00000095794	CREM	cAMP responsive element modulator	0.148648	3.06933	1.5709
														ENSG00000181467	RAP2B	RAP2B, member of RAS oncogene family	0.0297631	6.3401	1.51645
														ENSG00000127955	GNAI1	guanine nucleotide binding protein (G protein), alpha inhibiting activity polypeptide 1	0.0314905	24.4564	1.50532
														ENSG00000132359	RAP1GAP2	GTPase activating Rap/RanGAP domain-like 4	0.0679823	4.00156	1.50414
														ENSG00000132915	PDE6A	phosphodiesterase 6A, cGMP-specific, rod, alpha	0.270904	1.04196	1.48387
														ENSG00000206246	GPSM3	G-protein signaling modulator 3 (AGS3-like, C. elegans)	0.414474	1.09212	1.47976
														ENSG00000206314	GPSM3	G-protein signaling modulator 3 (AGS3-like, C. elegans)	0.414474	1.09212	1.47976
														ENSG00000213654	GPSM3	G-protein signaling modulator 3 (AGS3-like, C. elegans)	0.414474	1.09212	1.47976
														ENSG00000197555	SIPA1L1	signal-induced proliferation-associated 1 like 1	0.0238108	15.6894	1.38132
														ENSG00000114450	GNB4	guanine nucleotide binding protein (G protein), beta polypeptide 4	0.119136	4.00306	1.37069
														ENSG00000134489	HRH4	histamine receptor H4	0.515185	0.658504	1.36595
														ENSG00000174233	ADCY6	adenylate cyclase 6	0.310187	5.19782	1.35211
														ENSG00000078369	GNB1	guanine nucleotide binding protein (G protein), beta polypeptide 1	0.0507636	55.0958	1.34617
														ENSG00000123728	RAP2C	RAP2C, member of RAS oncogene family	0.0660111	10.4012	1.34342
														ENSG00000115137	DNAJC27	DnaJ (Hsp40) homolog, subfamily C, member 27	0.342931	2.3113	1.31935
														ENSG00000127314	RAP1B	RAP1B, member of RAS oncogene family	0.175423	13.4661	1.31318
														ENSG00000173848	NET1	neuroepithelial cell transforming 1	0.513695	3.13196	1.31002
														ENSG00000198055	GRK6	G protein-coupled receptor kinase 6	0.53079	3.11481	1.29885
														ENSG00000175220	ARHGAP1	Rho GTPase activating protein 1	0.190336	9.56997	1.29461
														ENSG00000132694	ARHGEF11	Rho guanine nucleotide exchange factor (GEF) 11	0.158641	11.6316	1.27303
														ENSG00000141480	ARRB2	arrestin, beta 2	0.347957	9.53212	1.26785
														ENSG00000160014	CALM2	calmodulin 3 (phosphorylase kinase, delta); calmodulin 2 (phosphorylase kinase, delta); calmodulin 1 (phosphorylase kinase, delta)	0.211996	173.065	1.25569
														ENSG00000198668	CALM2	calmodulin 3 (phosphorylase kinase, delta); calmodulin 2 (phosphorylase kinase, delta); calmodulin 1 (phosphorylase kinase, delta)	0.211996	173.065	1.25569
														ENSG00000143933	CALM2	calmodulin 3 (phosphorylase kinase, delta); calmodulin 2 (phosphorylase kinase, delta); calmodulin 1 (phosphorylase kinase, delta)	0.211996	173.065	1.25569
														ENSG00000116473	RAP1A	RAP1A, member of RAS oncogene family	0.186266	54.1092	1.24306
														ENSG00000121957	GPSM2	G-protein signaling modulator 2 (AGS3-like, C. elegans)	0.318033	11.1516	1.24241
														ENSG00000088256	GNA11	guanine nucleotide binding protein (G protein), alpha 11 (Gq class)	0.403949	3.79095	1.24158
														ENSG00000164742	ADCY1	adenylate cyclase 1 (brain)	0.59421	0.730802	1.23969
														ENSG00000125249	RAP2A	RAP2A, member of RAS oncogene family	0.293934	9.03717	1.22088
														ENSG00000159788	RGS12	regulator of G-protein signaling 12	0.478426	2.77698	1.22023
														ENSG00000070371	CLTCL1	clathrin, heavy chain-like 1	0.643721	0.929747	1.2135
														ENSG00000196914	ARHGEF12	Rho guanine nucleotide exchange factor (GEF) 12	0.2948	24.2847	1.21128
														ENSG00000136940	PDCL	phosducin-like	0.419291	7.8771	1.19923
														ENSG00000116584	ARHGEF2	Rho/Rac guanine nucleotide exchange factor (GEF) 2	0.339528	20.6062	1.19663
														ENSG00000156873	PHKG2	phosphorylase kinase, gamma 2 (testis)	0.644494	1.9097	1.19483
														ENSG00000114353	GNAI2	guanine nucleotide binding protein (G protein), alpha inhibiting activity polypeptide 2	0.395218	33.7262	1.18908
														ENSG00000174788	PCP2	Purkinje cell protein 2	0.694447	2.55325	1.18889
														ENSG00000071189	SNX13	sorting nexin 13	0.442511	6.9966	1.17171
														ENSG00000059769	DNAJC25	DnaJ (Hsp40) homolog, subfamily C , member 25; guanine nucleotide binding protein (G protein), gamma 10; DNAJC25-GNG10 readthrough transcript	0.720147	2.52733	1.16343
														ENSG00000156052	GNAQ	guanine nucleotide binding protein (G protein), q polypeptide	0.386688	19.7086	1.15814
														ENSG00000163486	SRGAP2	SLIT-ROBO Rho GTPase activating protein 2	0.778576	9.2324	1.15692
														ENSG00000005339	CREBBP	CREB binding protein	0.499496	31.0216	1.1536
														ENSG00000174373	RALGAPA1	GTPase activating Rap/RanGAP domain-like 1	0.439721	11.5282	1.15331
														ENSG00000125388	GRK4	G protein-coupled receptor kinase 4	0.807075	0.573928	1.14707
														ENSG00000160014	CALM3	calmodulin 3 (phosphorylase kinase, delta); calmodulin 2 (phosphorylase kinase, delta); calmodulin 1 (phosphorylase kinase, delta)	0.477319	39.2907	1.14462
														ENSG00000198668	CALM3	calmodulin 3 (phosphorylase kinase, delta); calmodulin 2 (phosphorylase kinase, delta); calmodulin 1 (phosphorylase kinase, delta)	0.477319	39.2907	1.14462
														ENSG00000143933	CALM3	calmodulin 3 (phosphorylase kinase, delta); calmodulin 2 (phosphorylase kinase, delta); calmodulin 1 (phosphorylase kinase, delta)	0.477319	39.2907	1.14462
														ENSG00000213611	GNG7	guanine nucleotide binding protein (G protein), gamma 7	0.767099	1.77949	1.13105
														ENSG00000176533	GNG7	guanine nucleotide binding protein (G protein), gamma 7	0.767099	1.77949	1.13105
														ENSG00000149782	PLCB3	phospholipase C, beta 3 (phosphatidylinositol-specific)	0.685292	2.86616	1.12612
														ENSG00000082701	GSK3B	glycogen synthase kinase 3 beta	0.617726	36.8081	1.11336
														ENSG00000198873	GRK5	G protein-coupled receptor kinase 5	0.774105	3.47764	1.11237
														ENSG00000213705	GNAS	GNAS complex locus	0.724387	864.161	1.10509
														ENSG00000087460	GNAS	GNAS complex locus	0.724387	864.161	1.10509
														ENSG00000141404	GNAL	guanine nucleotide binding protein (G protein), alpha activating activity polypeptide, olfactory type	0.778291	1.63784	1.10491
														ENSG00000133019	CHRM3	cholinergic receptor, muscarinic 3	0.798994	3.48957	1.10051
														ENSG00000107175	CREB3	cAMP responsive element binding protein 3	0.797129	7.87384	1.09149
														ENSG00000100393	EP300	E1A binding protein p300	0.727674	43.2711	1.08722
														ENSG00000138031	ADCY3	adenylate cyclase 3	0.811697	3.48895	1.08579
														ENSG00000100994	PYGB	phosphorylase, glycogen; brain	0.78356	7.5214	1.07832
														ENSG00000065135	GNAI3	guanine nucleotide binding protein (G protein), alpha inhibiting activity polypeptide 3	0.731079	24.3504	1.07495
														ENSG00000104880	ARHGEF18	Rho/Rac guanine nucleotide exchange factor (GEF) 18	0.83841	4.31075	1.06295
														ENSG00000160360	GPSM1	G-protein signaling modulator 1 (AGS3-like, C. elegans)	0.903613	2.81633	1.0599
														ENSG00000141367	CLTC	clathrin, heavy chain (Hc)	0.812227	32.9499	1.05918
														ENSG00000174021	GNG5	guanine nucleotide binding protein (G protein), gamma 5	0.844913	44.9174	1.05246
														ENSG00000132155	RAF1	v-raf-1 murine leukemia viral oncogene homolog 1	0.846517	21.9014	1.05212
														ENSG00000126767	ELK1	ELK1, member of ETS oncogene family	0.894088	3.3378	1.05149
														ENSG00000160293	VAV2	vav 2 guanine nucleotide exchange factor	0.928998	6.70372	1.02928
														ENSG00000160014	CALM1	calmodulin 3 (phosphorylase kinase, delta); calmodulin 2 (phosphorylase kinase, delta); calmodulin 1 (phosphorylase kinase, delta)	0.924883	37.1144	1.0252
														ENSG00000198668	CALM1	calmodulin 3 (phosphorylase kinase, delta); calmodulin 2 (phosphorylase kinase, delta); calmodulin 1 (phosphorylase kinase, delta)	0.924883	37.1144	1.0252
														ENSG00000143933	CALM1	calmodulin 3 (phosphorylase kinase, delta); calmodulin 2 (phosphorylase kinase, delta); calmodulin 1 (phosphorylase kinase, delta)	0.924883	37.1144	1.0252
														ENSG00000079482	OPHN1	oligophrenin 1	0.952251	4.96695	1.01898
														ENSG00000133256	PDE6B	phosphodiesterase 6B, cGMP-specific, rod, beta	0.97577	1.37175	1.01698
														ENSG00000111664	GNB3	guanine nucleotide binding protein (G protein), beta polypeptide 3	0.978635	1.19333	1.01576
														ENSG00000172354	GNB2	guanine nucleotide binding protein (G protein), beta polypeptide 2	0.965822	6.47709	1.01534
														ENSG00000138835	RGS3	regulator of G-protein signaling 3	0.968004	2.33516	1.01419
														ENSG00000171680	PLEKHG5	pleckstrin homology domain containing, family G (with RhoGef domain) member 5	0.984879	2.75247	1.01184
														ENSG00000118260	CREB1	cAMP responsive element binding protein 1	0.961269	14.8386	1.01094
Inflammation/immunity
TIP			FDR	RPKM	FC		STALK			FDR	RPKM	FC		BOTH				RPKM
ENSG00000121966	CXCR4	chemokine (C-X-C motif) receptor 4	0.000358228	6.86039	5.57074		ENSG00000127743	IL17B	interleukin 17B	3.35e-23	6.99573	84.4348		ENSG00000168610	STAT3	signal transducer and activator of transcription 3 (acute-phase response factor)	0.000685321	6.39024	1.88222
ENSG00000164171	ITGA2	integrin, alpha 2 (CD49B, alpha 2 subunit of VLA-2 receptor)	8.28e-20	35.5304	4.31088		ENSG00000115232	ITGA4	integrin, alpha 4 (antigen CD49D, alpha 4 subunit of VLA-4 receptor)	1.85e-14	0.914072	28.824		ENSG00000206300	LY6G5B	lymphocyte antigen 6 complex, locus G5B; casein kinase 2, beta polypeptide	0.078444	5.85974	1.87337
ENSG00000155657	TTN	titin	7.22e-08	4.97073	2.83671		ENSG00000196083	IL1RAP	interleukin 1 receptor accessory protein	1.69e-13	1.89443	12.3321		ENSG00000204435	LY6G5B	lymphocyte antigen 6 complex, locus G5B; casein kinase 2, beta polypeptide	0.078444	5.85974	1.87337
ENSG00000081059	TCF7	transcription factor 7 (T-cell specific, HMG-box)	9.37e-05	10.9488	2.81646		ENSG00000041982	TNC	tenascin C	2.74e-14	5.30013	9.13445		ENSG00000206406	LY6G5B	lymphocyte antigen 6 complex, locus G5B; casein kinase 2, beta polypeptide	0.078444	5.85974	1.87337
ENSG00000091409	ITGA6	integrin, alpha 6	0.00169365	26.8456	2.79771		ENSG00000133083	DCLK1	doublecortin-like kinase 1	9.17e-06	2.27943	3.94405		ENSG00000114737	CISH	cytokine inducible SH2-containing protein	0.066225	2.08859	1.84948
ENSG00000019582	CD74	CD74 molecule, major histocompatibility complex, class II invariant chain	2.67e-07	21.4289	2.79547		ENSG00000160654	CD3G	CD3g molecule, gamma (CD3-TCR complex)	1.91e-05	3.8625	3.90011		ENSG00000101082	SLA2	Src-like-adaptor 2	0.116819	0.578929	1.79705
ENSG00000119969	HELLS	helicase, lymphoid-specific	3.91e-07	27.1027	2.24398		ENSG00000137070	IL11RA	interleukin 11 receptor, alpha	9.24e-09	10.8624	3.62157		ENSG00000121594	CD80	CD80 molecule	0.160602	0.978204	1.76645
ENSG00000134215	VAV3	vav 3 guanine nucleotide exchange factor	0.000118527	5.15807	2.16295		ENSG00000213949	ITGA1	integrin, alpha 1	7.86e-06	9.12376	2.7119		ENSG00000142539	SPIB	Spi-B transcription factor (Spi-1/PU.1 related)	0.165682	0.706014	1.74735
ENSG00000167775	CD320	CD320 molecule	0.000506385	11.3607	2.12539		ENSG00000137273	FOXF2	forkhead box F2	9.79e-05	8.04832	2.69459		ENSG00000174123	TLR10	toll-like receptor 10	0.160724	0.559253	1.74417
							ENSG00000134352	IL6ST	interleukin 6 signal transducer (gp130, oncostatin M receptor)	5.33e-11	24.3766	2.57824		ENSG00000111145	ELK3	ELK3, ETS-domain protein (SRF accessory protein 2)	0.0179969	8.16794	1.68168
							ENSG00000170390	DCLK2	doublecortin-like kinase 2	0.00826818	1.5941	2.43085		ENSG00000095585	BLNK	B-cell linker	0.0715715	9.39117	1.65187
							ENSG00000046889	PREX2	phosphatidylinositol-3,4,5-trisphosphate-dependent Rac exchange factor 2	0.00302964	3.06188	2.36634		ENSG00000102908	NFAT5	nuclear factor of activated T-cells 5, tonicity-responsive	0.201933	19.1383	1.6411
							ENSG00000090376	IRAK3	interleukin-1 receptor-associated kinase 3	0.0189578	1.65434	2.25399		ENSG00000102962	CCL22	chemokine (C-C motif) ligand 22	0.235593	0.690559	1.62945
							ENSG00000100968	NFATC4	nuclear factor of activated T-cells, cytoplasmic, calcineurin-dependent 4	2.21e-08	20.4594	2.24596		ENSG00000159113	IL10RB	interleukin 10 receptor, beta	0.123832	2.55691	1.62938
							ENSG00000148737	TCF7L2	transcription factor 7-like 2 (T-cell specific, HMG-box)	3.71e-07	15.855	2.18757		ENSG00000168970	PLA2G4B	JMJD7-PLA2G4B readthrough transcript; phospholipase A2, group IVB (cytosolic); jumonji domain containing 7	0.139382	2.26042	1.56867
							ENSG00000150907	FOXO1	forkhead box O1	0.00250789	2.5229	2.16333		ENSG00000127666	TICAM1	toll-like receptor adaptor molecule 1	0.309042	1.10885	1.56409
							ENSG00000103522	IL21R	interleukin 21 receptor	0.105383	0.57244	2.05241		ENSG00000115594	IL1R1	interleukin 1 receptor, type I	0.148797	2.50539	1.55747
							ENSG00000103241	FOXF1	forkhead box F1	0.00535798	20.5666	2.01964		ENSG00000184216	IRAK1	interleukin-1 receptor-associated kinase 1	0.0339644	5.12584	1.55089
														ENSG00000185338	SOCS1	suppressor of cytokine signaling 1	0.27564	1.74394	1.55031
														ENSG00000196664	TLR7	toll-like receptor 7	0.309989	0.466819	1.53562
														ENSG00000221978	CCR6	cyclin L2; chemokine (C-C motif) receptor 6	0.358082	0.687914	1.49785
														ENSG00000112486	CCR6	cyclin L2; chemokine (C-C motif) receptor 6	0.358082	0.687914	1.49785
														ENSG00000215726	CCR6	cyclin L2; chemokine (C-C motif) receptor 6	0.358082	0.687914	1.49785
														ENSG00000171150	SOCS5	suppressor of cytokine signaling 5	0.0960754	3.18679	1.49615
														ENSG00000184557	SOCS3	suppressor of cytokine signaling 3	0.389522	0.765189	1.4892
														ENSG00000204498	NFKBIL1	nuclear factor of kappa light polypeptide gene enhancer in B-cells inhibitor-like 1	0.298211	2.52947	1.48598
														ENSG00000168593	NFKBIL1	nuclear factor of kappa light polypeptide gene enhancer in B-cells inhibitor-like 1	0.298211	2.52947	1.48598
														ENSG00000206440	NFKBIL1	nuclear factor of kappa light polypeptide gene enhancer in B-cells inhibitor-like 1	0.298211	2.52947	1.48598
														ENSG00000161570	CCL5	chemokine (C-C motif) ligand 5	0.28089	3.70525	1.46502
														ENSG00000221978	CCNL2	cyclin L2; chemokine (C-C motif) receptor 6	0.125137	18.7605	1.46234
														ENSG00000112486	CCNL2	cyclin L2; chemokine (C-C motif) receptor 6	0.125137	18.7605	1.46234
														ENSG00000215726	CCNL2	cyclin L2; chemokine (C-C motif) receptor 6	0.125137	18.7605	1.46234
														ENSG00000089250	NOS1	nitric oxide synthase 1 (neuronal)	0.389522	0.208976	1.45587
														ENSG00000160712	IL6R	interleukin 6 receptor	0.410876	0.491348	1.40707
														ENSG00000136634	IL10	interleukin 10	0.474031	0.996665	1.39927
														ENSG00000096968	JAK2	Janus kinase 2	0.308089	0.902602	1.39246
														ENSG00000077150	NFKB2	nuclear factor of kappa light polypeptide gene enhancer in B-cells 2 (p49/p100)	0.495754	0.633954	1.38143
														ENSG00000175104	TRAF6	TNF receptor-associated factor 6	0.0774998	4.45991	1.37844
														ENSG00000162434	JAK1	Janus kinase 1	0.0734218	12.6907	1.37718
														ENSG00000077238	IL4R	interleukin 4 receptor	0.302298	2.29106	1.37242
														ENSG00000166888	STAT6	signal transducer and activator of transcription 6, interleukin-4 induced	0.0710209	9.52115	1.34397
														ENSG00000198001	IRAK4	interleukin-1 receptor-associated kinase 4	0.252959	3.36043	1.32886
														ENSG00000027697	IFNGR1	interferon gamma receptor 1	0.292409	7.44315	1.30481
														ENSG00000196632	WNK3	WNK lysine deficient protein kinase 3	0.101606	11.4769	1.27195
														ENSG00000131724	IL13RA1	interleukin 13 receptor, alpha 1	0.200521	11.2914	1.26592
														ENSG00000160014	CALM2	calmodulin 3 (phosphorylase kinase, delta); calmodulin 2 (phosphorylase kinase, delta); calmodulin 1 (phosphorylase kinase, delta)	0.211996	173.065	1.25569
														ENSG00000198668	CALM2	calmodulin 3 (phosphorylase kinase, delta); calmodulin 2 (phosphorylase kinase, delta); calmodulin 1 (phosphorylase kinase, delta)	0.211996	173.065	1.25569
														ENSG00000143933	CALM2	calmodulin 3 (phosphorylase kinase, delta); calmodulin 2 (phosphorylase kinase, delta); calmodulin 1 (phosphorylase kinase, delta)	0.211996	173.065	1.25569
														ENSG00000174130	TLR6	toll-like receptor 6	0.660467	0.430404	1.23438
														ENSG00000159110	IFNAR2	interferon (alpha, beta and omega) receptor 2	0.56731	2.74314	1.2265
														ENSG00000180008	SOCS4	suppressor of cytokine signaling 4	0.376141	3.92289	1.21588
														ENSG00000142166	IFNAR1	interferon (alpha, beta and omega) receptor 1	0.423301	6.6171	1.20691
														ENSG00000170677	SOCS6	suppressor of cytokine signaling 6	0.440573	4.36028	1.19844
														ENSG00000060237	WNK1	WNK lysine deficient protein kinase 1; hypothetical LOC100132369	0.384397	50.5129	1.19813
														ENSG00000170581	STAT2	signal transducer and activator of transcription 2, 113kDa	0.339072	8.90303	1.19237
														ENSG00000206300	CSNK2B	lymphocyte antigen 6 complex, locus G5B; casein kinase 2, beta polypeptide	0.406066	36.1314	1.18
														ENSG00000204435	CSNK2B	lymphocyte antigen 6 complex, locus G5B; casein kinase 2, beta polypeptide	0.406066	36.1314	1.18
														ENSG00000206406	CSNK2B	lymphocyte antigen 6 complex, locus G5B; casein kinase 2, beta polypeptide	0.406066	36.1314	1.18
														ENSG00000213341	CHUK	conserved helix-loop-helix ubiquitous kinase	0.608541	3.8928	1.17991
														ENSG00000150093	ITGB1	integrin, beta 1 (fibronectin receptor, beta polypeptide, antigen CD29 includes MDF2, MSK12)	0.513138	89.394	1.15365
														ENSG00000105443	CYTH2	cytohesin 2	0.794497	13.6668	1.14912
														ENSG00000158711	ELK4	ELK4, ETS-domain protein (SRF accessory protein 1)	0.543252	4.12947	1.14645
														ENSG00000160014	CALM3	calmodulin 3 (phosphorylase kinase, delta); calmodulin 2 (phosphorylase kinase, delta); calmodulin 1 (phosphorylase kinase, delta)	0.477319	39.2907	1.14462
														ENSG00000198668	CALM3	calmodulin 3 (phosphorylase kinase, delta); calmodulin 2 (phosphorylase kinase, delta); calmodulin 1 (phosphorylase kinase, delta)	0.477319	39.2907	1.14462
														ENSG00000143933	CALM3	calmodulin 3 (phosphorylase kinase, delta); calmodulin 2 (phosphorylase kinase, delta); calmodulin 1 (phosphorylase kinase, delta)	0.477319	39.2907	1.14462
														ENSG00000168214	RBPJ	recombination signal binding protein for immunoglobulin kappa J region	0.52603	28.883	1.14217
														ENSG00000126561	STAT5A	signal transducer and activator of transcription 5A	0.819907	0.408397	1.13997
														ENSG00000168970	JMJD7	JMJD7-PLA2G4B readthrough transcript; phospholipase A2, group IVB (cytosolic); jumonji domain containing 7	0.851994	3.51875	1.12058
														ENSG00000166710	B2M	beta-2-microglobulin	0.743656	17.4307	1.10614
														ENSG00000213705	GNAS	GNAS complex locus	0.724387	864.161	1.10509
														ENSG00000087460	GNAS	GNAS complex locus	0.724387	864.161	1.10509
														ENSG00000150455	TIRAP	toll-interleukin 1 receptor (TIR) domain containing adaptor protein	0.82066	3.34373	1.09678
														ENSG00000070061	IKBKAP	inhibitor of kappa light polypeptide gene enhancer in B-cells, kinase complex-associated protein	0.794154	10.6672	1.06996
														ENSG00000100906	NFKBIA	nuclear factor of kappa light polypeptide gene enhancer in B-cells inhibitor, alpha	0.865974	9.17449	1.06793
														ENSG00000104365	IKBKB	inhibitor of kappa light polypeptide gene enhancer in B-cells, kinase beta	0.847871	3.26082	1.06754
														ENSG00000172458	IL17D	interleukin 17D	0.920822	1.69078	1.0632
														ENSG00000126767	ELK1	ELK1, member of ETS oncogene family	0.894088	3.3378	1.05149
														ENSG00000105639	JAK3	Janus kinase 3	0.925664	0.746001	1.05112
														ENSG00000183735	TBK1	TANK-binding kinase 1	0.878723	6.03094	1.05011
														ENSG00000174111	SOCS7	suppressor of cytokine signaling 7	0.887638	4.90342	1.0442
														ENSG00000072736	NFATC3	nuclear factor of activated T-cells, cytoplasmic, calcineurin-dependent 3	0.861095	26.5922	1.04361
														ENSG00000173757	STAT5B	signal transducer and activator of transcription 5B	0.88773	9.31239	1.03504
														ENSG00000173531	MST1	macrophage stimulating 1 (hepatocyte growth factor-like)	0.95031	5.50646	1.02561
														ENSG00000160014	CALM1	calmodulin 3 (phosphorylase kinase, delta); calmodulin 2 (phosphorylase kinase, delta); calmodulin 1 (phosphorylase kinase, delta)	0.924883	37.1144	1.0252
														ENSG00000198668	CALM1	calmodulin 3 (phosphorylase kinase, delta); calmodulin 2 (phosphorylase kinase, delta); calmodulin 1 (phosphorylase kinase, delta)	0.924883	37.1144	1.0252
														ENSG00000143933	CALM1	calmodulin 3 (phosphorylase kinase, delta); calmodulin 2 (phosphorylase kinase, delta); calmodulin 1 (phosphorylase kinase, delta)	0.924883	37.1144	1.0252
														ENSG00000159128	IFNGR2	interferon gamma receptor 2 (interferon gamma transducer 1)	0.936997	12.9284	1.02416
														ENSG00000109320	NFKB1	nuclear factor of kappa light polypeptide gene enhancer in B-cells 1	0.942478	8.96798	1.02067
														ENSG00000164867	NOS3	nitric oxide synthase 3 (endothelial cell)	0.988468	0.726409	1.0083
														ENSG00000172936	MYD88	myeloid differentiation primary response gene (88)	0.992071	6.72293	1.0032
Vasculature
TIP			FDR	RPKM	FC		STALK			FDR	RPKM	FC		BOTH			FDR	RPKM	FC
ENSG00000142627	EPHA2	EPH receptor A2	2.42e-26	14.8524	15.3		ENSG00000175899	A2M	alpha-2-macroglobulin	3.98e-28	33.1439	19.55		ENSG00000104213	PDGFRL	platelet-derived growth factor receptor-like	0.0888337	4.45685	1.79937
ENSG00000135333	EPHA7	EPH receptor A7	1.36e-16	20.8042	3.41587		ENSG00000044524	EPHA3	EPH receptor A3	1.21e-08	6.96973	9.9946		ENSG00000117298	ECE1	endothelin converting enzyme 1	0.0885325	2.78605	1.79595
ENSG00000116106	EPHA4	EPH receptor A4	1.4e-10	20.3608	2.34214		ENSG00000019991	HGF	hepatocyte growth factor (hepapoietin A; scatter factor)	2.5e-05	2.71019	7.41213		ENSG00000080224	EPHA6	EPH receptor A6	0.209101	2.37894	1.79556
ENSG00000118523	CTGF	connective tissue growth factor	0.00088716	14.7632	2.22253		ENSG00000056345	ITGB3	integrin, beta 3 (platelet glycoprotein IIIa, antigen CD61)	1.12e-08	3.27047	6.51778		ENSG00000145194	ECE2	endothelin converting enzyme 2	0.147462	2.54076	1.74833
ENSG00000125266	EFNB2	ephrin-B2	1.27e-05	64.3634	2.04395		ENSG00000120156	TEK	TEK tyrosine kinase, endothelial	0.000118021	1.0749	6.30845		ENSG00000102755	FLT1	fms-related tyrosine kinase 1 (vascular endothelial growth factor/vascular permeability factor receptor)	0.172073	3.66349	1.71078
							ENSG00000134853	PDGFRA	platelet-derived growth factor receptor, alpha polypeptide	1.47e-13	45.342	5.9012		ENSG00000184349	EFNA5	ephrin-A5	0.000401879	20.1893	1.69004
							ENSG00000126838	PZP	pregnancy-zone protein	5.93e-06	0.63927	5.27394		ENSG00000181104	F2R	coagulation factor II (thrombin) receptor	0.00160875	22.9376	1.60484
							ENSG00000136160	EDNRB	endothelin receptor type B	2.02e-11	20.0749	4.44943		ENSG00000169403	PTAFR	platelet-activating factor receptor	0.27164	0.622874	1.60111
							ENSG00000170962	PDGFD	platelet derived growth factor D	5.73e-06	1.9583	4.2549		ENSG00000183317	EPHA10	EPH receptor A10	0.266389	0.820831	1.57718
							ENSG00000124205	EDN3	endothelin 3	4.12e-08	26.4339	3.16795		ENSG00000168970	PLA2G4B	JMJD7-PLA2G4B readthrough transcript; phospholipase A2, group IVB (cytosolic); jumonji domain containing 7	0.139382	2.26042	1.56867
							ENSG00000154928	EPHB1	EPH receptor B1	0.00173455	1.89005	2.83985		ENSG00000091879	ANGPT2	angiopoietin 2	0.0795887	2.04172	1.5636
														ENSG00000115325	DOK1	docking protein 1-like protein; docking protein 1, 62kDa (downstream of tyrosine kinase 1)	0.223199	2.19844	1.52816
														ENSG00000198734	F5	coagulation factor V (proaccelerin, labile factor)	0.158532	0.8773	1.52459
														ENSG00000090776	EFNB1	ephrin-B1	0.0840421	7.79384	1.51736
														ENSG00000182580	EPHB3	EPH receptor B3	0.121092	3.65319	1.49469
														ENSG00000154188	ANGPT1	angiopoietin 1	0.355693	4.80027	1.46116
														ENSG00000078401	EDN1	endothelin 1	0.631213	0.913073	1.40569
														ENSG00000127533	F2RL3	coagulation factor II (thrombin) receptor-like 3	0.481632	0.603805	1.38382
														ENSG00000143620	EFNA4	ephrin-A4	0.131888	23.2791	1.38022
														ENSG00000063176	SPHK2	sphingosine kinase 2	0.661894	1.83484	1.34563
														ENSG00000151617	EDNRA	endothelin receptor type A	0.43402	5.46316	1.29035
														ENSG00000196411	EPHB4	EPH receptor B4	0.198665	10.6369	1.25724
														ENSG00000186716	BCR	breakpoint cluster region	0.452865	3.02721	1.22431
														ENSG00000145723	GIN1	gypsy retrotransposon integrase 1	0.616666	2.00005	1.19716
														ENSG00000140564	FURIN	furin (paired basic amino acid cleaving enzyme)	0.4932	6.81393	1.18113
														ENSG00000168970	JMJD7	JMJD7-PLA2G4B readthrough transcript; phospholipase A2, group IVB (cytosolic); jumonji domain containing 7	0.851994	3.51875	1.12058
														ENSG00000196684	HSH2D	hematopoietic SH2 domain containing	0.844884	0.598523	1.11287
														ENSG00000173511	VEGFB	vascular endothelial growth factor B	0.766246	7.56079	1.1078
														ENSG00000133216	EPHB2	EPH receptor B2	0.685425	8.4429	1.09946
														ENSG00000089159	PXN	paxillin	0.756223	9.43726	1.08188
														ENSG00000143590	EFNA3	ephrin-A3	0.897542	1.63869	1.08104
														ENSG00000176105	YES1	v-yes-1 Yamaguchi sarcoma viral oncogene homolog 1	0.801471	20.5728	1.05899
														ENSG00000112715	VEGFA	vascular endothelial growth factor A	0.93067	79.4886	1.05098
														ENSG00000159842	ABR	active BCR-related gene	0.894163	11.7556	1.03808
														ENSG00000197461	PDGFA	platelet-derived growth factor alpha polypeptide	0.930517	15.4254	1.02651
														ENSG00000110031	LPXN	leupaxin	0.964503	1.60213	1.02455
														ENSG00000117525	F3	coagulation factor III (thromboplastin, tissue factor)	0.975478	1.10056	1.01722
														ENSG00000146904	EPHA1	EPH receptor A1	0.979104	1.93787	1.01195
														ENSG00000164867	NOS3	nitric oxide synthase 3 (endothelial cell)	0.988468	0.726409	1.0083
Ras
TIP			FDR	RPKM	FC		STALK			FDR	RPKM	FC		BOTH			FDR	RPKM	FC
ENSG00000154229	PRKCA	protein kinase C, alpha	8.54e-20	18.4697	3.44144		ENSG00000077264	PAK3	p21 protein (Cdc42/Rac)-activated kinase 3	2.46e-13	1.65324	22.7787		ENSG00000168610	STAT3	signal transducer and activator of transcription 3 (acute-phase response factor)	0.000685321	6.39024	1.88222
ENSG00000163932	PRKCD	protein kinase C, delta	4.51e-09	7.32916	3.07065		ENSG00000126785	RHOJ	ras homolog gene family, member J	4.52e-22	11.3454	8.97048		ENSG00000166484	MAPK7	mitogen-activated protein kinase 7	0.000995642	6.47497	1.84617
							ENSG00000136997	MYC	v-myc myelocytomatosis viral oncogene homolog (avian)	7.11e-15	10.5859	7.77755		ENSG00000155366	RHOC	ras homolog gene family, member C	0.00798903	8.96249	1.84172
							ENSG00000120875	DUSP4	dual specificity phosphatase 4	8.89e-09	2.02528	6.52389		ENSG00000172575	RASGRP1	RAS guanyl releasing protein 1 (calcium and DAG-regulated)	0.0759081	0.767072	1.78773
							ENSG00000126458	RRAS	related RAS viral (r-ras) oncogene homolog	1.05e-06	3.54262	5.50442		ENSG00000173039	RELA	v-rel reticuloendotheliosis viral oncogene homolog A (avian)	0.147686	12.3255	1.7648
							ENSG00000171132	PRKCE	protein kinase C, epsilon	1.48e-12	2.87711	4.77683		ENSG00000011405	PIK3C2A	phosphoinositide-3-kinase, class 2, alpha polypeptide	0.000134675	32.4814	1.7425
							ENSG00000143344	RGL1	ral guanine nucleotide dissociation stimulator-like 1	1.01e-14	5.68924	4.17087		ENSG00000106617	PRKAG2	protein kinase, AMP-activated, gamma 2 non-catalytic subunit	0.087103	2.49044	1.73561
							ENSG00000109339	MAPK10	mitogen-activated protein kinase 10	1.22e-08	7.18573	4.00492		ENSG00000177606	JUN	jun oncogene	0.0117366	59.2449	1.69124
							ENSG00000081189	MEF2C	myocyte enhancer factor 2C	3.73e-07	2.79235	3.64476		ENSG00000163558	PRKCI	protein kinase C, iota	0.00116535	39.9215	1.68766
							ENSG00000143507	DUSP10	dual specificity phosphatase 10	0.0108076	3.32593	3.40858		ENSG00000181929	PRKAG1	protein kinase, AMP-activated, gamma 1 non-catalytic subunit	0.179923	19.3743	1.6761
							ENSG00000027075	PRKCH	protein kinase C, eta	4.17e-05	2.55973	3.38308		ENSG00000143878	RHOB	ras homolog gene family, member B	0.0204163	15.7618	1.65129
							ENSG00000133878	DUSP26	dual specificity phosphatase 26 (putative)	7.95e-05	3.69494	3.35765		ENSG00000162924	REL	v-rel reticuloendotheliosis viral oncogene homolog (avian)	0.0551867	5.53391	1.64443
							ENSG00000101349	PAK7	p21 protein (Cdc42/Rac)-activated kinase 7	0.0180317	0.641866	2.49653		ENSG00000145675	PIK3R1	phosphoinositide-3-kinase, regulatory subunit 1 (alpha)	0.00474944	16.4239	1.6417
							ENSG00000184545	DUSP8	dual specificity phosphatase 8	0.0293764	0.771922	2.41402		ENSG00000078061	ARAF	v-raf murine sarcoma 3611 viral oncogene homolog	0.253904	2.04622	1.64028
							ENSG00000134954	ETS1	v-ets erythroblastosis virus E26 oncogene homolog 1 (avian)	0.113492	4.96302	2.27092		ENSG00000147507	LYN	v-yes-1 Yamaguchi sarcoma viral related oncogene homolog	0.464102	0.546706	1.58319
							ENSG00000117020	AKT3	v-akt murine thymoma viral oncogene homolog 3 (protein kinase B, gamma)	4.19e-06	12.805	2.09932		ENSG00000095794	CREM	cAMP responsive element modulator	0.148648	3.06933	1.5709
														ENSG00000168970	PLA2G4B	JMJD7-PLA2G4B readthrough transcript; phospholipase A2, group IVB (cytosolic); jumonji domain containing 7	0.139382	2.26042	1.56867
														ENSG00000104312	RIPK2	receptor-interacting serine-threonine kinase 2	0.190689	3.15989	1.48182
														ENSG00000170653	ATF7	activating transcription factor 7	0.293628	60.044	1.47349
														ENSG00000133056	PIK3C2B	phosphoinositide-3-kinase, class 2, beta polypeptide	0.0124609	11.8148	1.4708
														ENSG00000136810	TXN	thioredoxin	0.0207444	89.141	1.46644
														ENSG00000197122	SRC	v-src sarcoma (Schmidt-Ruppin A-2) viral oncogene homolog (avian)	0.0262517	15.8082	1.45266
														ENSG00000105647	PIK3R2	phosphoinositide-3-kinase, regulatory subunit 2 (beta)	0.119339	3.49206	1.44896
														ENSG00000160271	RALGDS	ral guanine nucleotide dissociation stimulator	0.138583	4.95422	1.39291
														ENSG00000108953	YWHAE	similar to 14-3-3 protein epsilon (14-3-3E) (Mitochondrial import stimulation factor L subunit) (MSF L); tyrosine 3-monooxygenase/tryptophan 5-monooxygenase activation protein, epsilon polypeptide	0.0756504	361.676	1.38581
														ENSG00000171777	RASGRP4	RAS guanyl releasing protein 4	0.455457	1.02433	1.37701
														ENSG00000180370	PAK2	p21 protein (Cdc42/Rac)-activated kinase 2	0.035736	26.3928	1.37344
														ENSG00000112679	DUSP22	similar to mitogen-activated protein kinase phosphatase x; dual specificity phosphatase 22	0.425846	3.8805	1.35957
														ENSG00000105221	AKT2	v-akt murine thymoma viral oncogene homolog 2	0.503151	37.9151	1.35452
														ENSG00000130522	JUND	jun D proto-oncogene	0.107876	19.6739	1.34974
														ENSG00000117461	PIK3R3	phosphoinositide-3-kinase, regulatory subunit 3 (gamma)	0.451316	14.6795	1.34618
														ENSG00000034152	MAP2K3	mitogen-activated protein kinase kinase 3	0.451057	2.08486	1.3434
														ENSG00000171862	PTEN	phosphatase and tensin homolog; phosphatase and tensin homolog pseudogene 1	0.0423813	20.1712	1.33765
														ENSG00000112062	MAPK14	mitogen-activated protein kinase 14	0.119101	12.5135	1.31801
														ENSG00000167065	DUSP18	dual specificity phosphatase 18	0.324343	4.71501	1.31756
														ENSG00000089022	MAPKAPK5	mitogen-activated protein kinase-activated protein kinase 5	0.316849	6.26528	1.29113
														ENSG00000213281	NRAS	neuroblastoma RAS viral (v-ras) oncogene homolog	0.0875699	21.6786	1.29041
														ENSG00000146426	TIAM2	T-cell lymphoma invasion and metastasis 2	0.461553	1.72127	1.2901
														ENSG00000100485	SOS2	son of sevenless homolog 2 (Drosophila)	0.170812	10.9193	1.28432
														ENSG00000115966	ATF2	activating transcription factor 2	0.490202	102.407	1.27936
														ENSG00000071242	RPS6KA2	ribosomal protein S6 kinase, 90kDa, polypeptide 2; hypothetical LOC100127984	0.301077	4.05841	1.26993
														ENSG00000111266	DUSP16	dual specificity phosphatase 16	0.227518	12.7577	1.2663
														ENSG00000102882	MAPK3	hypothetical LOC100271831; mitogen-activated protein kinase 3	0.327932	13.0725	1.26399
														ENSG00000171608	PIK3CD	phosphoinositide-3-kinase, catalytic, delta polypeptide	0.453996	1.48847	1.25987
														ENSG00000119729	RHOQ	ras homolog gene family, member Q; similar to small GTP binding protein TC10	0.268108	6.72268	1.25708
														ENSG00000219234	SHC1	SHC (Src homology 2 domain containing) transforming protein 1	0.62835	15.5281	1.2428
														ENSG00000160691	SHC1	SHC (Src homology 2 domain containing) transforming protein 1	0.62835	15.5281	1.2428
														ENSG00000158186	MRAS	muscle RAS oncogene homolog	0.384092	7.0874	1.23244
														ENSG00000144118	RALB	v-ral simian leukemia viral oncogene homolog B (ras related; GTP binding protein)	0.42506	6.68508	1.23193
														ENSG00000133818	RRAS2	related RAS viral (r-ras) oncogene homolog 2; similar to related RAS viral (r-ras) oncogene homolog 2	0.390269	9.71171	1.22231
														ENSG00000133703	KRAS	v-Ki-ras2 Kirsten rat sarcoma viral oncogene homolog	0.288996	13.6608	1.22141
														ENSG00000108861	DUSP3	dual specificity phosphatase 3	0.444416	6.98906	1.20802
														ENSG00000120129	DUSP1	dual specificity phosphatase 1	0.727709	7.68851	1.20586
														ENSG00000142208	AKT1	v-akt murine thymoma viral oncogene homolog 1	0.327407	13.8766	1.19947
														ENSG00000129219	PLD2	phospholipase D2	0.584531	2.87718	1.19657
														ENSG00000161326	DUSP14	dual specificity phosphatase 14	0.68963	3.00871	1.19076
														ENSG00000168468	ATF6B	activating transcription factor 6 beta	0.45189	13.5971	1.18995
														ENSG00000143398	PIP5K1A	phosphatidylinositol-4-phosphate 5-kinase, type I, alpha	0.318121	25.6649	1.18591
														ENSG00000139725	RHOF	ras homolog gene family, member F (in filopodia)	0.686983	1.66413	1.18306
														ENSG00000105723	GSK3A	glycogen synthase kinase 3 alpha	0.466176	16.4417	1.16697
														ENSG00000164086	DUSP7	dual specificity phosphatase 7	0.550264	7.09402	1.1665
														ENSG00000137275	RIPK1	receptor (TNFRSF)-interacting serine-threonine kinase 1	0.596966	5.74023	1.16187
														ENSG00000127914	AKAP9	A kinase (PRKA) anchor protein (yotiao) 9	0.637152	70.5921	1.16177
														ENSG00000156711	MAPK13	mitogen-activated protein kinase 13	0.624565	3.32881	1.15737
														ENSG00000107643	MAPK8	mitogen-activated protein kinase 8	0.620351	4.37349	1.15255
														ENSG00000006451	RALA	v-ral simian leukemia viral oncogene homolog A (ras related)	0.463846	15.0136	1.14709
														ENSG00000067560	RHOA	ras homolog gene family, member A	0.558468	264.156	1.14295
														ENSG00000118046	STK11	serine/threonine kinase 11	0.741404	1.74639	1.14205
														ENSG00000174775	HRAS	v-Ha-ras Harvey rat sarcoma viral oncogene homolog	0.732106	6.92576	1.13272
														ENSG00000186111	PIP5K1C	phosphatidylinositol-4-phosphate 5-kinase, type I, gamma	0.714485	2.64587	1.12643
														ENSG00000115904	SOS1	son of sevenless homolog 1 (Drosophila)	0.516115	18.0281	1.12429
														ENSG00000168970	JMJD7	JMJD7-PLA2G4B readthrough transcript; phospholipase A2, group IVB (cytosolic); jumonji domain containing 7	0.851994	3.51875	1.12058
														ENSG00000162889	MAPKAPK2	mitogen-activated protein kinase-activated protein kinase 2	0.733094	5.8426	1.11907
														ENSG00000204218	RGL2	ral guanine nucleotide dissociation stimulator-like 2	0.620573	13.0837	1.11679
														ENSG00000206282	RGL2	ral guanine nucleotide dissociation stimulator-like 2	0.620573	13.0837	1.11679
														ENSG00000206210	RGL2	ral guanine nucleotide dissociation stimulator-like 2	0.620573	13.0837	1.11679
														ENSG00000082701	GSK3B	glycogen synthase kinase 3 beta	0.617726	36.8081	1.11336
														ENSG00000121879	PIK3CA	phosphoinositide-3-kinase, catalytic, alpha polypeptide	0.702402	9.21536	1.102
														ENSG00000051382	PIK3CB	phosphoinositide-3-kinase, catalytic, beta polypeptide	0.823507	1.46544	1.10145
														ENSG00000100030	MAPK1	mitogen-activated protein kinase 1	0.647871	17.2344	1.09556
														ENSG00000106615	RHEB	Ras homolog enriched in brain	0.716039	26.1047	1.08538
														ENSG00000108984	MAP2K6	mitogen-activated protein kinase kinase 6	0.815436	5.75623	1.08476
														ENSG00000126934	MAP2K2	mitogen-activated protein kinase kinase 2 pseudogene; mitogen-activated protein kinase kinase 2	0.832036	5.05043	1.08459
														ENSG00000136238	RAC1	ras-related C3 botulinum toxin substrate 1 (rho family, small GTP binding protein Rac1)	0.718039	92.7803	1.08313
														ENSG00000067606	PRKCZ	protein kinase C, zeta	0.80509	9.5376	1.07709
														ENSG00000157764	BRAF	v-raf murine sarcoma viral oncogene homolog B1	0.823966	10.3333	1.06528
														ENSG00000157106	SMG1	SMG1 homolog, phosphatidylinositol 3-kinase-related kinase (C. elegans)	0.799209	17.5046	1.06418
														ENSG00000177885	GRB2	growth factor receptor-bound protein 2	0.908028	4.15742	1.06266
														ENSG00000162999	DUSP19	dual specificity phosphatase 19	0.88773	1.58765	1.06041
														ENSG00000117676	RPS6KA1	ribosomal protein S6 kinase, 90kDa, polypeptide 1	0.913387	1.66222	1.05976
														ENSG00000072133	RPS6KA6	ribosomal protein S6 kinase, 90kDa, polypeptide 6	0.858879	3.04423	1.05714
														ENSG00000050748	MAPK9	mitogen-activated protein kinase 9	0.868546	6.90565	1.05335
														ENSG00000132155	RAF1	v-raf-1 murine leukemia viral oncogene homolog 1	0.846517	21.9014	1.05212
														ENSG00000126767	ELK1	ELK1, member of ETS oncogene family	0.894088	3.3378	1.05149
														ENSG00000175634	RPS6KB2	ribosomal protein S6 kinase, 70kDa, polypeptide 2	0.909622	4.74306	1.04739
														ENSG00000177189	RPS6KA3	ribosomal protein S6 kinase, 90kDa, polypeptide 3	0.86194	9.88945	1.0455
														ENSG00000108443	RPS6KB1	ribosomal protein S6 kinase, 70kDa, polypeptide 1	0.874729	11.037	1.04298
														ENSG00000149311	ATM	similar to Serine-protein kinase ATM (Ataxia telangiectasia mutated) (A-T, mutated); ataxia telangiectasia mutated	0.856402	8.5435	1.0404
														ENSG00000143622	RIT1	Ras-like without CAAX 1	0.906467	10.1826	1.03967
														ENSG00000114738	MAPKAPK3	mitogen-activated protein kinase-activated protein kinase 3	0.922717	4.42191	1.03773
														ENSG00000085511	MAP3K4	mitogen-activated protein kinase kinase kinase 4	0.902723	12.4571	1.03308
														ENSG00000157869	RAB28	RAB28, member RAS oncogene family	0.942862	9.69684	1.02464
														ENSG00000169032	MAP2K1	mitogen-activated protein kinase kinase 1	0.941321	15.7133	1.02249
														ENSG00000140992	PDPK1	3-phosphoinositide dependent protein kinase-1	0.942862	7.12199	1.02115
														ENSG00000078142	PIK3C3	phosphoinositide-3-kinase, class 3	0.953065	18.7099	1.01693
														ENSG00000135341	MAP3K7	mitogen-activated protein kinase kinase kinase 7	0.963314	9.08338	1.01144
														ENSG00000118260	CREB1	cAMP responsive element binding protein 1	0.961269	14.8386	1.01094
														ENSG00000173156	RHOD	ras homolog gene family, member D	0.997719	2.23434	1.00137
Cell proliferation/apoptosis
TIP			FDR	RPKM	FC		STALK			FDR	RPKM	FC		BOTH			FDR	RPKM	FC
ENSG00000111816	FRK	fyn-related kinase	0.0027547	4.50367	3.14183		ENSG00000073282	TP63	tumor protein p63	0.000841276	1.51329	10.4307		ENSG00000010810	FYN	FYN oncogene related to SRC, FGR, YES	0.150158	3.19692	1.6745
ENSG00000023445	BIRC3	baculoviral IAP repeat-containing 3	0.0112546	0.492799	2.7746		ENSG00000099860	GADD45B	growth arrest and DNA-damage-inducible, beta	1.28e-05	2.27217	8.66263		ENSG00000120889	TNFRSF10B	tumor necrosis factor receptor superfamily, member 10b	0.0079641	4.68855	1.64552
							ENSG00000147027	TMEM47	transmembrane protein 47	2.15e-23	33.767	6.13469		ENSG00000114423	CBLB	Cas-Br-M (murine) ecotropic retroviral transforming sequence b	0.00261325	18.096	1.61699
							ENSG00000103460	TOX3	TOX high mobility group box family member 3	5.62e-05	7.13563	4.87103		ENSG00000138764	CCNG2	cyclin G2	0.00946959	12.9858	1.51397
							ENSG00000148180	GSN	gelsolin (amyloidosis, Finnish type)	4.18e-09	6.72546	4.12132		ENSG00000067182	TNFRSF1A	tumor necrosis factor receptor superfamily, member 1A	0.0650765	10.724	1.43744
							ENSG00000003402	CFLAR	CASP8 and FADD-like apoptosis regulator	0.0018137	7.59735	2.83706		ENSG00000164741	DLC1	deleted in liver cancer 1	0.256002	1.80395	1.40236
							ENSG00000112378	PERP	PERP, TP53 apoptosis effector	9.67e-07	12.6888	2.24584		ENSG00000170312	CDK1	cell division cycle 2, G1 to S and G2 to M	0.505562	15.0528	1.3193
							ENSG00000085117	CD82	CD82 molecule	0.0351436	1.93859	2.12855		ENSG00000127191	TRAF2	TNF receptor-associated factor 2	0.553536	1.73243	1.27746
														ENSG00000173530	TNFRSF10D	tumor necrosis factor receptor superfamily, member 10d, decoy with truncated death domain	0.433252	4.49749	1.25961
														ENSG00000103197	TSC2	tuberous sclerosis 2	0.1913	8.0701	1.25762
														ENSG00000156735	BAG4	BCL2-associated athanogene 4	0.292622	5.91436	1.2555
														ENSG00000110395	CBL	Cas-Br-M (murine) ecotropic retroviral transforming sequence	0.254463	15.1484	1.21348
														ENSG00000145723	GIN1	gypsy retrotransposon integrase 1	0.616666	2.00005	1.19716
														ENSG00000213341	CHUK	conserved helix-loop-helix ubiquitous kinase	0.608541	3.8928	1.17991
														ENSG00000005339	CREBBP	CREB binding protein	0.499496	31.0216	1.1536
														ENSG00000136280	CCM2	cerebral cavernous malformation 2	0.803894	1.15039	1.14005
														ENSG00000198625	MDM4	Mdm4 p53 binding protein homolog (mouse)	0.551169	18.7902	1.12037
														ENSG00000110514	MADD	MAP-kinase activating death domain	0.688136	6.41656	1.10133
														ENSG00000112242	E2F3	E2F transcription factor 3	0.864222	10.0384	1.09284
														ENSG00000100393	EP300	E1A binding protein p300	0.727674	43.2711	1.08722
														ENSG00000070831	CDC42	cell division cycle 42 (GTP binding protein, 25kDa); cell division cycle 42 pseudogene 2	0.705438	59.5401	1.07947
														ENSG00000198793	MTOR	mechanistic target of rapamycin (serine/threonine kinase)	0.767285	10.3087	1.07421
														ENSG00000139687	RB1	retinoblastoma 1	0.880658	9.0678	1.03748
														ENSG00000165699	TSC1	tuberous sclerosis 1	0.898012	9.47394	1.0322
														ENSG00000185104	FAF1	Fas (TNFRSF6) associated factor 1	0.958831	10.8417	1.01661
														ENSG00000132906	CASP9	caspase 9, apoptosis-related cysteine peptidase	0.99862	2.05607	1.00089

## Sheet: TF
SUPPLEMENTAL TABLE 1: transcription factors and signalling molecules differentially expressed in human tip versus stalk
Transcription Factors
Tip							Stalk							Both
Ensemble ID	Symbol	Gene name	FDR	RPKM	FC		Ensemble ID	Symbol	Gene name	FDR	RPKM	FC		Ensemble ID	Symbol	Gene name	FDR	RPKM	FC
ENSG00000159387	IRX6	iroquois homeobox 6	1.67e-30	3.40606	122.011		ENSG00000165061	ZMAT4	zinc finger, matrin type 4	4.49e-27	9.6238	973.586		ENSG00000102349	KLF8	Kruppel-like factor 8	0.00252287	1.99273	1.99454
ENSG00000171656	ETV5	ets variant 5	4.44e-20	227.907	72.5103		ENSG00000173404	INSM1	insulinoma-associated 1	3.64e-35	5.42868	399.569		ENSG00000136870	ZNF189	zinc finger protein 189	0.0630494	18.8935	1.9866
ENSG00000120149	MSX2	msh homeobox 2	7.52e-26	3.4644	68.9731		ENSG00000109132	PHOX2B	paired-like homeobox 2b	4.11e-27	3.70334	153.535		ENSG00000118263	KLF7	Kruppel-like factor 7 (ubiquitous)	1.73e-06	9.80097	1.98099
ENSG00000175832	ETV4	ets variant 4	4.72e-17	4.69569	30.5975		ENSG00000139352	ASCL1	achaete-scute complex homolog 1 (Drosophila)	8.32e-67	24.923	152.211		ENSG00000136352	NKX2-1	NK2 homeobox 1	2.37e-06	71.2973	1.98067
ENSG00000204335	SP5	Sp5 transcription factor	3.77e-15	8.80309	15.8348		ENSG00000184058	TBX1	T-box 1	1.14e-20	2.07552	66.8537		ENSG00000116604	MEF2D	myocyte enhancer factor 2D	6.69e-05	4.79194	1.97945
ENSG00000123405	NFE2	nuclear factor (erythroid-derived 2), 45kDa	4.26e-07	3.56738	9.24283		ENSG00000144355	DLX1	distal-less homeobox 1	1.13e-17	2.7016	64.9577		ENSG00000106479	ZNF862	zinc finger protein 862	0.00192006	1.44182	1.97831
ENSG00000125398	SOX9	SRY (sex determining region Y)-box 9	4.54e-30	179.269	7.94706		ENSG00000184828	ZBTB7C	zinc finger and BTB domain containing 7C	6e-21	1.35232	43.0596		ENSG00000151623	NR3C2	nuclear receptor subfamily 3, group C, member 2	0.00363753	2.07534	1.97448
ENSG00000117318	ID3	inhibitor of DNA binding 3, dominant negative helix-loop-helix protein	1.02e-11	18.4608	6.63412		ENSG00000125285	SOX21	SRY (sex determining region Y)-box 21	1.71e-11	1.43517	42.9595		ENSG00000151789	ZNF385D	zinc finger protein 385D	0.140573	3.46296	1.97434
ENSG00000141448	GATA6	GATA binding protein 6	9.93e-35	41.4703	5.88707		ENSG00000164107	HAND2	heart and neural crest derivatives expressed 2	5.29e-22	3.72739	35.7273		ENSG00000101665	SMAD7	SMAD family member 7	0.00136481	11.6955	1.97208
ENSG00000125968	ID1	inhibitor of DNA binding 1, dominant negative helix-loop-helix protein	1.14e-11	10.219	5.81585		ENSG00000178573	MAF	v-maf musculoaponeurotic fibrosarcoma oncogene homolog (avian)	1.31e-24	2.93198	34.9239		ENSG00000196381	ZNF781	zinc finger protein 781	0.0686083	0.565369	1.9481
ENSG00000185002	RFX6	regulatory factor X, 6	8.94e-20	21.4836	4.55598		ENSG00000106511	MEOX2	mesenchyme homeobox 2	1.11e-12	1.64844	28.1244		ENSG00000084676	NCOA1	nuclear receptor coactivator 1	2.12e-07	16.4219	1.94565
ENSG00000129173	E2F8	E2F transcription factor 8	9.93e-10	19.2662	3.52337		ENSG00000151090	THRB	thyroid hormone receptor, beta (erythroblastic leukemia viral (v-erb-a) oncogene homolog 2, avian)	1.26e-32	12.9	21.4288		ENSG00000123933	MXD4	MAX dimerization protein 4	0.0100977	4.30051	1.94438
ENSG00000170485	NPAS2	neuronal PAS domain protein 2	3.77e-10	10.7686	3.33202		ENSG00000134317	GRHL1	grainyhead-like 1 (Drosophila)	7.66e-36	10.3662	19.4489		ENSG00000185960	SHOX	short stature homeobox	0.0721027	3.36367	1.93435
ENSG00000163884	KLF15	Kruppel-like factor 15	0.00118796	1.39486	3.28369		ENSG00000187098	MITF	microphthalmia-associated transcription factor	1.48e-38	8.41612	18.4492		ENSG00000155966	AFF2	AF4/FMR2 family, member 2	0.000238211	1.88676	1.91676
ENSG00000177426	TGIF1	TGFB-induced factor homeobox 1	1.71e-15	63.6944	3.20807		ENSG00000135373	EHF	ets homologous factor	9.11e-26	4.02308	15.8358		ENSG00000213973	ZNF99	zinc finger protein 99	0.0566226	0.768296	1.91393
ENSG00000135374	ELF5	E74-like factor 5 (ets domain transcription factor)	6.84e-05	8.19422	2.85947		ENSG00000173068	BNC2	basonuclin 2	1.42e-32	6.79167	13.7623		ENSG00000155090	KLF10	Kruppel-like factor 10	0.000949917	7.59238	1.91134
ENSG00000081059	TCF7	transcription factor 7 (T-cell specific, HMG-box)	9.37e-05	10.9488	2.81646		ENSG00000198597	ZNF536	zinc finger protein 536	7.61e-11	0.691943	11.9739		ENSG00000123358	NR4A1	nuclear receptor subfamily 4, group A, member 1	0.0696426	0.960151	1.90991
ENSG00000166188	ZNF319	zinc finger protein 319	0.0166745	3.91921	2.67229		ENSG00000073282	TP63	tumor protein p63 Homo sapiens	0.000841276	1.51329	10.4307		ENSG00000119042	SATB2	SATB homeobox 2	0.0375223	1.11134	1.90911
ENSG00000006468	ETV1	ets variant 1	5.29e-06	14.4671	2.66709		ENSG00000204103	MAFB	v-maf musculoaponeurotic fibrosarcoma oncogene homolog B (avian)	1.91e-09	5.43436	10.1694		ENSG00000137834	SMAD6	SMAD family member 6	0.0207497	2.47102	1.8962
ENSG00000101412	E2F1	E2F transcription factor 1	0.00369822	3.21258	2.66388		ENSG00000075426	FOSL2	FOS-like antigen 2	9.87e-09	1.44583	9.62546		ENSG00000174306	ZHX3	zinc fingers and homeoboxes 3	0.000933779	1.95316	1.88868
ENSG00000115738	ID2	inhibitor of DNA binding 2, dominant negative helix-loop-helix protein	7.94e-08	45.5265	2.61918		ENSG00000127124	HIVEP3	human immunodeficiency virus type I enhancer binding protein 3	6.85e-13	0.486284	9.01165		ENSG00000007968	E2F2	E2F transcription factor 2	0.0271256	2.3199	1.88812
ENSG00000134323	MYCN	v-myc myelocytomatosis viral related oncogene, neuroblastoma derived (avian)	3.6e-09	14.7756	2.57547		ENSG00000008441	NFIX	nuclear factor I/X (CCAAT-binding transcription factor)	2.74e-29	10.0267	8.69406		ENSG00000177842	ZNF620	zinc finger protein 620	0.00439396	3.80506	1.88556
ENSG00000138795	LEF1	lymphoid enhancer-binding factor 1	3.13e-08	26.6205	2.48268		ENSG00000106852	LHX6	LIM homeobox 6	8.22e-13	1.86035	8.18186		ENSG00000074047	GLI2	GLI family zinc finger 2	0.00453716	4.22222	1.88241
ENSG00000157557	ETS2	v-ets erythroblastosis virus E26 oncogene homolog 2 (avian)	1.06e-05	17.8842	2.43899		ENSG00000105997	HOXA3	homeobox A3	8.64e-14	3.82861	8.13973		ENSG00000168610	STAT3	signal transducer and activator of transcription 3 (acute-phase response factor)	0.000685321	6.39024	1.88222
ENSG00000170549	IRX1	iroquois homeobox 1	1.05e-07	27.8306	2.38276		ENSG00000146592	CREB5	cAMP responsive element binding protein 5	2.21e-16	2.62526	7.98078		ENSG00000186446	ZNF501	zinc finger protein 501	0.0185709	2.42307	1.87818
ENSG00000197360	ZNF98	zinc finger protein 98 (F7175); keratin associated protein 1-1; zinc finger protein 492; zinc finger protein 849 pseudogene	0.00389401	2.2432	2.34297		ENSG00000028277	POU2F2	POU class 2 homeobox 2	4.49e-13	1.05922	7.93594		ENSG00000171056	SOX7	SRY (sex determining region Y)-box 7	0.142202	0.482847	1.87781
ENSG00000184771	CEBPA	CCAAT/enhancer binding protein (C/EBP), alpha	0.0118413	1.47577	2.31961		ENSG00000144331	ZNF385B	zinc finger protein 385B	3.35e-07	1.63084	7.9209		ENSG00000053254	FOXN3	forkhead box N3	7.79e-05	24.7485	1.87466
ENSG00000149948	HMGA2	high mobility group AT-hook 2	9.03e-07	205.178	2.29337		ENSG00000136997	MYC	v-myc myelocytomatosis viral oncogene homolog (avian)	7.11e-15	10.5859	7.77755		ENSG00000164331	ANKRA2	ankyrin repeat, family A (RFXANK-like), 2	0.00549827	6.71152	1.87074
ENSG00000197360	ZNF492	zinc finger protein 98 (F7175); keratin associated protein 1-1; zinc finger protein 492; zinc finger protein 849 pseudogene	0.00111289	3.76642	2.25421		ENSG00000181449	SOX2	SRY (sex determining region Y)-box 2	1.52e-43	59.8172	7.36163		ENSG00000215897	ZBTB8B	zinc finger and BTB domain containing 8B	0.019246	2.14359	1.86416
ENSG00000176842	IRX5	iroquois homeobox 5	1.53e-05	25.5152	2.22553		ENSG00000091656	ZFHX4	zinc finger homeobox 4	6.97e-11	3.45193	7.3476		ENSG00000172216	CEBPB	CCAAT/enhancer binding protein (C/EBP), beta	0.08138	1.0374	1.84534
ENSG00000137309	HMGA1	hypothetical LOC100130009; high mobility group AT-hook 1	8.42e-05	127.881	2.19916		ENSG00000131196	NFATC1	nuclear factor of activated T-cells, cytoplasmic, calcineurin-dependent 1	1.39e-05	1.56394	7.33495		ENSG00000114315	HES1	hairy and enhancer of split 1, (Drosophila)	0.0152968	57.939	1.84339
ENSG00000101057	MYBL2	v-myb myeloblastosis viral oncogene homolog (avian)-like 2	1.29e-05	15.9846	2.19193		ENSG00000181722	ZBTB20	zinc finger and BTB domain containing 20	9.73e-08	20.2019	7.08841		ENSG00000122386	ZNF205	zinc finger protein 205	0.111886	0.861434	1.83428
ENSG00000050344	NFE2L3	nuclear factor (erythroid-derived 2)-like 3	3.94e-05	8.23748	2.14507		ENSG00000106004	HOXA5	homeobox A5	1.09e-13	25.9134	7.01642		ENSG00000010818	HIVEP2	human immunodeficiency virus type I enhancer binding protein 2	0.000255155	4.30524	1.82135
ENSG00000101115	SALL4	sal-like 4 (Drosophila)	0.000160121	9.22893	2.13609		ENSG00000115641	FHL2	four and a half LIM domains 2	2.44e-06	5.63894	6.99083		ENSG00000106571	GLI3	GLI family zinc finger 3	1.43e-05	18.3074	1.81464
ENSG00000108753	HNF1B	HNF1 homeobox B	0.00833209	28.4319	2.08988		ENSG00000143995	MEIS1	Meis homeobox 1	1.42e-13	40.5054	6.71789		ENSG00000170954	ZNF415	zinc finger protein 415	0.00475002	5.77582	1.81399
ENSG00000029639	TFB1M	transcription factor B1, mitochondrial	0.000433261	11.6241	2.04194		ENSG00000169744	LDB2	LIM domain binding 2	4.47e-11	5.65853	6.6758		ENSG00000197566	ZNF624	zinc finger protein 624	0.0116971	2.95671	1.80439
ENSG00000134138	MEIS2	Meis homeobox 2	3.77e-06	20.5937	2.02219		ENSG00000019549	SNAI2	snail homolog 2 (Drosophila)	9.47e-12	53.9627	6.64598		ENSG00000197841	ZNF181	zinc finger protein 181	0.0067381	3.64344	1.79633
ENSG00000179361	ARID3B	AT rich interactive domain 3B (BRIGHT-like)	5.96e-06	17.7926	2.01594		ENSG00000022267	FHL1	four and a half LIM domains 1	1.99e-15	17.1339	6.63415		ENSG00000185551	NR2F2	nuclear receptor subfamily 2, group F, member 2	0.00010042	15.604	1.79482
							ENSG00000168497	SDPR	serum deprivation response (phosphatidylserine binding protein)	1.15e-08	2.17841	6.44701		ENSG00000100146	SOX10	SRY (sex determining region Y)-box 10	0.118401	2.4144	1.79275
							ENSG00000085276	MECOM	ecotropic viral integration site 1	6.08e-28	39.8426	6.34153		ENSG00000114853	ZBTB47	zinc finger and BTB domain containing 47	0.181388	0.378422	1.78945
							ENSG00000107249	GLIS3	GLIS family zinc finger 3	1.11e-11	1.98823	6.27786		ENSG00000104177	MYEF2	myelin expression factor 2	9.35e-06	18.2132	1.78554
							ENSG00000151322	NPAS3	neuronal PAS domain protein 3	7.45e-06	0.823155	6.16026		ENSG00000151650	VENTX	VENT homeobox homolog (Xenopus laevis)	0.165191	0.662301	1.75146
							ENSG00000182463	TSHZ2	teashirt zinc finger homeobox 2	0.00099461	3.20096	6.0437		ENSG00000142539	SPIB	Spi-B transcription factor (Spi-1/PU.1 related)	0.165682	0.706014	1.74735
							ENSG00000147862	NFIB	nuclear factor I/B	4.37e-15	30.7941	6.00811		ENSG00000176678	FOXL1	forkhead box L1	0.205519	1.18294	1.74574
							ENSG00000113580	NR3C1	nuclear receptor subfamily 3, group C, member 1 (glucocorticoid receptor)	1.21e-17	22.0365	5.93236		ENSG00000197385	ZNF860	zinc finger protein 860	0.0362805	3.16253	1.74092
							ENSG00000177374	HIC1	hypermethylated in cancer 1	1.1e-06	1.14778	5.9117		ENSG00000135100	HNF1A	HNF1 homeobox A	0.0940987	1.06849	1.7391
							ENSG00000141052	MYOCD	myocardin	2.99e-06	35.4854	5.65084		ENSG00000185630	PBX1	pre-B-cell leukemia homeobox 1	0.000314996	62.5429	1.73818
							ENSG00000140262	TCF12	transcription factor 12	2.46e-07	72.9294	5.52075		ENSG00000197647	ZNF433	zinc finger protein 433	0.0680139	4.63868	1.73768
							ENSG00000143867	OSR1	odd-skipped related 1 (Drosophila)	1.12e-09	6.47579	5.50584		ENSG00000133740	E2F5	E2F transcription factor 5, p130-binding	0.00173544	13.361	1.7348
							ENSG00000181444	ZNF467	zinc finger protein 467	1.08e-06	2.26641	5.33099		ENSG00000197857	ZNF44	zinc finger protein 44	0.0112856	4.61812	1.7327
							ENSG00000079102	RUNX1T1	runt-related transcription factor 1; translocated to, 1 (cyclin D-related)	1.14e-05	2.47812	5.24707		ENSG00000119403	PHF19	PHD finger protein 19	0.0190623	2.91118	1.72576
							ENSG00000159216	RUNX1	runt-related transcription factor 1	2.1e-15	3.85613	5.22684		ENSG00000140836	ZFHX3	zinc finger homeobox 3; hypothetical LOC100132068	0.00258408	67.7174	1.72142
							ENSG00000189120	SP6	Sp6 transcription factor	9.9e-06	0.67023	5.14144		ENSG00000140577	CRTC3	CREB regulated transcription coactivator 3	6.12e-05	9.74122	1.72023
							ENSG00000118526	TCF21	transcription factor 21	3.02e-10	11.6559	5.13559		ENSG00000134107	BHLHE40	basic helix-loop-helix family, member e40	0.523618	9.00986	1.71501
							ENSG00000105996	HOXA2	homeobox A2	3.21e-09	6.33463	5.00643		ENSG00000105392	CRX	cone-rod homeobox	0.143623	0.740588	1.71233
							ENSG00000061455	PRDM6	PR domain containing 6	2.58e-06	9.22247	4.9634		ENSG00000137413	TAF8	TAF8 RNA polymerase II, TATA box binding protein (TBP)-associated factor, 43kDa	0.000406968	9.02753	1.71146
							ENSG00000103460	TOX3	TOX high mobility group box family member 3	5.62e-05	7.13563	4.87103		ENSG00000160336	ZNF761	zinc finger protein 761	0.0111576	6.73604	1.70117
							ENSG00000141905	NFIC	nuclear factor I/C (CCAAT-binding transcription factor)	1.45e-06	27.6072	4.76301		ENSG00000170561	IRX2	iroquois homeobox 2	0.00133584	15.5568	1.69829
							ENSG00000121297	TSHZ3	teashirt zinc finger homeobox 3	8.37e-11	15.9366	4.72476		ENSG00000198477	ZNF280B	zinc finger protein 280B	0.00157458	6.54173	1.69744
							ENSG00000169554	ZEB2	zinc finger E-box binding homeobox 2	1.06e-12	27.9199	4.71416		ENSG00000161405	IKZF3	IKAROS family zinc finger 3 (Aiolos)	0.0350296	1.56614	1.69715
							ENSG00000196132	MYT1	myelin transcription factor 1	0.00104954	0.888378	4.53609		ENSG00000128573	FOXP2	forkhead box P2	0.0274121	61.1093	1.69487
							ENSG00000115112	TFCP2L1	transcription factor CP2-like 1	5.7e-05	0.388163	4.46753		ENSG00000196418	ZNF124	zinc finger protein 124	0.00132046	38.61	1.69211
							ENSG00000198353	HOXC4	homeobox C4	2.11e-05	2.44585	4.41094		ENSG00000197472	ZNF695	zinc finger protein 695	0.0553825	2.66971	1.69135
							ENSG00000175745	NR2F1	nuclear receptor subfamily 2, group F, member 1	1.47e-08	7.77395	4.16071		ENSG00000177606	JUN	jun oncogene	0.0117366	59.2449	1.69124
							ENSG00000188290	HES4	hairy and enhancer of split 4 (Drosophila)	3.61e-05	1.86185	4.12145		ENSG00000178150	ZNF114	zinc finger protein 114	0.166122	1.90298	1.69074
							ENSG00000113916	BCL6	B-cell CLL/lymphoma 6	1.39e-15	13.8236	4.10462		ENSG00000198566	ZNF658	zinc finger protein 658	0.131611	0.636556	1.68898
							ENSG00000148516	ZEB1	zinc finger E-box binding homeobox 1	0.000527556	26.3679	4.10075		ENSG00000204531	POU5F1	POU class 5 homeobox 1	0.173244	10.033	1.68339
							ENSG00000109819	PPARGC1A	peroxisome proliferator-activated receptor gamma, coactivator 1 alpha	0.00498229	1.33769	4.09798		ENSG00000111145	ELK3	ELK3, ETS-domain protein (SRF accessory protein 2)	0.0179969	8.16794	1.68168
							ENSG00000144485	HES6	hairy and enhancer of split 6 (Drosophila)	8.5e-08	8.38543	4.08347		ENSG00000101190	TCFL5	transcription factor-like 5 (basic helix-loop-helix)	0.0325515	4.29036	1.68052
							ENSG00000089225	TBX5	T-box 5	6.71e-09	36.1531	3.84391		ENSG00000175691	ZNF77	zinc finger protein 77	0.276832	2.0051	1.67902
							ENSG00000163565	IFI16	interferon, gamma-inducible protein 16	7.67e-05	4.26856	3.7021		ENSG00000106006	HOXA6	homeobox A6	0.149129	1.4563	1.67886
							ENSG00000136826	KLF4	Kruppel-like factor 4 (gut)	0.027812	0.959453	3.67187		ENSG00000160973	FOXH1	forkhead box H1	0.215765	0.996108	1.6716
							ENSG00000197576	HOXA4	homeobox A4	2.64e-05	5.58587	3.66047		ENSG00000083812	ZNF324	zinc finger protein 324	0.0843062	1.45089	1.66847
							ENSG00000081189	MEF2C	myocyte enhancer factor 2C	3.73e-07	2.79235	3.64476		ENSG00000143067	ZNF697	hypothetical LOC100130667; zinc finger protein 697	0.00491813	3.97421	1.66816
							ENSG00000117707	PROX1	prospero homeobox 1	0.000331835	2.05853	3.58835		ENSG00000197016	ZNF470	zinc finger protein 470	0.00674923	2.54663	1.66763
							ENSG00000121068	TBX2	T-box 2	2.1e-05	8.10499	3.48949		ENSG00000111087	GLI1	GLI family zinc finger 1	0.250191	4.76746	1.66453
							ENSG00000130940	CASZ1	castor zinc finger 1	4.99e-05	1.33052	3.46561		ENSG00000172201	ID4	inhibitor of DNA binding 4, dominant negative helix-loop-helix protein	0.0352901	4.1404	1.6644
							ENSG00000179981	TSHZ1	teashirt zinc finger homeobox 1	1.44e-11	8.56563	3.37723		ENSG00000069812	HES2	hairy and enhancer of split 2 (Drosophila)	0.202479	0.606295	1.66269
							ENSG00000087510	TFAP2C	transcription factor AP-2 gamma (activating enhancer binding protein 2 gamma)	0.00142239	1.86913	3.26478		ENSG00000165861	ZFYVE1	zinc finger, FYVE domain containing 1	0.11132	1.77434	1.65566
							ENSG00000196628	TCF4	transcription factor 4	0.000267175	9.58665	3.23651		ENSG00000140044	JDP2	Jun dimerization protein 2	0.30752	0.605261	1.65303
							ENSG00000157613	CREB3L1	cAMP responsive element binding protein 3-like 1	0.000131452	4.68648	3.18735		ENSG00000177599	ZNF491	zinc finger protein 491	0.158532	1.18667	1.64769
							ENSG00000112182	BACH2	BTB and CNC homology 1, basic leucine zipper transcription factor 2	0.000140055	8.94185	3.15776		ENSG00000180530	NRIP1	nuclear receptor interacting protein 1	0.000579785	19.7284	1.64729
							ENSG00000102554	KLF5	Kruppel-like factor 5 (intestinal)	0.000118793	5.44308	3.1489		ENSG00000125798	FOXA2	forkhead box A2	0.0081029	28.3744	1.64224
							ENSG00000130700	GATA5	GATA binding protein 5	0.000256029	1.91408	3.14417		ENSG00000102908	NFAT5	nuclear factor of activated T-cells 5, tonicity-responsive	0.201933	19.1383	1.6411
							ENSG00000185650	ZFP36L1	zinc finger protein 36, C3H type-like 1	0.00118758	13.0768	3.07887		ENSG00000129911	KLF16	Kruppel-like factor 16	0.177814	1.09657	1.63306
							ENSG00000135111	TBX3	T-box 3	8.01e-08	12.1262	3.06365		ENSG00000198429	ZNF69	zinc finger protein 69	0.0402057	7.80988	1.63292
							ENSG00000171574	ZNF324B	zinc finger protein 324B	0.00200333	0.890849	3.06058		ENSG00000112559	MDFI	MyoD family inhibitor	0.0270858	8.59646	1.62369
							ENSG00000048540	LMO3	LIM domain only 3 (rhombotin-like 2)	0.000490963	8.28779	3.05463		ENSG00000172493	AFF1	AF4/FMR2 family, member 1	0.000782411	13.4729	1.62299
							ENSG00000141582	CBX4	chromobox homolog 4 (Pc class homolog, Drosophila)	0.000465782	2.69297	3.01959		ENSG00000141040	ZNF287	zinc finger protein 287	0.064226	1.86334	1.61947
							ENSG00000171222	SCAND1	SCAN domain containing 1	0.000296252	3.82047	2.97192		ENSG00000110693	SOX6	SRY (sex determining region Y)-box 6	0.22521	3.98981	1.61811
							ENSG00000105419	MEIS3	Meis homeobox 3; Meis homeobox 3 pseudogene 2	0.000276312	2.54738	2.95662		ENSG00000178935	ZNF552	zinc finger protein 552	0.0609137	4.58504	1.61738
							ENSG00000152518	ZFP36L2	zinc finger protein 36, C3H type-like 2	1.87e-11	48.2748	2.93436		ENSG00000196793	ZNF239	zinc finger protein 239	0.0918649	4.45797	1.60964
							ENSG00000181690	PLAG1	pleiomorphic adenoma gene 1	0.0041523	9.81113	2.92546		ENSG00000140009	ESR2	estrogen receptor 2 (ER beta)	0.334399	2.15431	1.60383
							ENSG00000169594	BNC1	basonuclin 1	0.013579	0.394285	2.92061		ENSG00000133794	ARNTL	aryl hydrocarbon receptor nuclear translocator-like	0.217426	0.520579	1.60259
							ENSG00000120075	HOXB5	homeobox B5	3.5e-05	24.3203	2.90216		ENSG00000198453	ZNF568	zinc finger protein 568	0.113492	2.00271	1.6023
							ENSG00000172059	KLF11	Kruppel-like factor 11	6.07e-05	3.17075	2.83753		ENSG00000165804	ZNF219	zinc finger protein 219	0.0750188	6.94495	1.59603
							ENSG00000169946	ZFPM2	zinc finger protein, multitype 2	0.0016377	5.28374	2.76531		ENSG00000083814	ZNF671	zinc finger protein 671	0.0461776	4.31503	1.59348
							ENSG00000137273	FOXF2	forkhead box F2	9.79e-05	8.04832	2.69459		ENSG00000085415	SEH1L	SEH1-like (S. cerevisiae)	0.00323969	16.7946	1.59202
							ENSG00000124440	HIF3A	hypoxia inducible factor 3, alpha subunit	3.16e-12	34.0458	2.55884		ENSG00000169951	ZNF764	zinc finger protein 764	0.0431439	7.77751	1.59115
							ENSG00000183741	CBX6	chromobox homolog 6	0.00102198	3.13986	2.54563		ENSG00000137693	YAP1	Yes-associated protein 1, 65kDa	0.128362	7.35103	1.58838
							ENSG00000167081	PBX3	pre-B-cell leukemia homeobox 3	2.85e-08	37.4553	2.51756		ENSG00000102034	ELF4	E74-like factor 4 (ets domain transcription factor)	0.180417	1.26713	1.57965
							ENSG00000121075	TBX4	T-box 4	0.0012216	30.04	2.46229		ENSG00000221974	GTF2H4	general transcription factor IIH, polypeptide 4, 52kDa	0.161761	2.31304	1.57887
							ENSG00000173917	HOXB2	homeobox B2	0.0435033	3.48052	2.37325		ENSG00000140548	ZNF710	zinc finger protein 710	0.0132033	5.96374	1.57676
							ENSG00000198795	ZNF521	zinc finger protein 521	5.64e-08	14.8161	2.35034		ENSG00000161642	ZNF385A	zinc finger protein 385A	0.136505	2.25839	1.57189
							ENSG00000175395	ZNF25	zinc finger protein 25	5.27e-05	5.55757	2.34714		ENSG00000068305	MEF2A	myocyte enhancer factor 2A	0.00247365	17.0837	1.57138
							ENSG00000182742	HOXB4	homeobox B4	0.00816905	5.45575	2.34214		ENSG00000114126	TFDP2	transcription factor Dp-2 (E2F dimerization partner 2)	0.142169	21.0997	1.56967
							ENSG00000118495	PLAGL1	pleiomorphic adenoma gene-like 1	0.0136809	29.8018	2.33298		ENSG00000189190	ZNF600	zinc finger protein 600	0.115625	3.44542	1.56752
							ENSG00000218891	ZNF579	zinc finger protein 579	0.0377804	1.13147	2.3065		ENSG00000198039	ZNF273	zinc finger protein 273	0.0504817	3.08127	1.56174
							ENSG00000143013	LMO4	LIM domain only 4	6.99e-08	11.6905	2.29099		ENSG00000162086	ZNF75A	zinc finger protein 75a	0.0380895	7.62572	1.56123
							ENSG00000163909	HEYL	hairy/enhancer-of-split related with YRPW motif-like	0.00337983	2.9661	2.28873		ENSG00000173275	ZNF449	zinc finger protein 449	0.126016	1.90975	1.5607
							ENSG00000196781	TLE1	similar to transducin-like enhancer of split 1 (E(sp1) homolog, Drosophila); transducin-like enhancer of split 1 (E(sp1) homolog, Drosophila)	0.000171411	8.84732	2.28664		ENSG00000186230	ZNF749	zinc finger protein 749	0.060156	3.64478	1.55801
							ENSG00000134954	ETS1	v-ets erythroblastosis virus E26 oncogene homolog 1 (avian)	0.113492	4.96302	2.27092		ENSG00000112511	PHF1	PHD finger protein 1	0.237596	9.30735	1.55678
							ENSG00000100968	NFATC4	nuclear factor of activated T-cells, cytoplasmic, calcineurin-dependent 4	2.21e-08	20.4594	2.24596		ENSG00000125347	IRF1	interferon regulatory factor 1	0.188759	1.66101	1.55412
							ENSG00000117036	ETV3	ets variant 3	0.0072357	3.76589	2.23428		ENSG00000053702	NRIP2	nuclear receptor interacting protein 2	0.291051	1.34922	1.55271
							ENSG00000162599	NFIA	nuclear factor I/A	8.45e-10	19.0181	2.23384		ENSG00000197050	ZNF420	zinc finger protein 420	0.153505	2.57477	1.54796
							ENSG00000126351	THRA	thyroid hormone receptor, alpha (erythroblastic leukemia viral (v-erb-a) oncogene homolog, avian)	0.00526899	12.9669	2.21638		ENSG00000187626	ZKSCAN4	zinc finger with KRAB and SCAN domains 4	0.10619	3.90319	1.54694
							ENSG00000089335	ZNF302	zinc finger protein 302	5.06e-05	7.90127	2.19841		ENSG00000196466	ZNF799	zinc finger protein 799	0.140928	2.59495	1.5456
							ENSG00000148737	TCF7L2	transcription factor 7-like 2 (T-cell specific, HMG-box)	3.71e-07	15.855	2.18757		ENSG00000059728	MXD1	MAX dimerization protein 1	0.0496818	5.84229	1.53518
							ENSG00000150907	FOXO1	forkhead box O1	0.00250789	2.5229	2.16333		ENSG00000182111	ZNF716	zinc finger protein 716	0.337966	0.491402	1.535
							ENSG00000188283	ZNF383	zinc finger protein 383	0.00192831	6.29279	2.11231		ENSG00000138378	STAT4	signal transducer and activator of transcription 4	0.346218	0.873496	1.53122
							ENSG00000121417	ZNF211	zinc finger protein 211	0.000236942	6.94564	2.11073		ENSG00000132005	RFX1	regulatory factor X, 1 (influences HLA class II expression)	0.314099	0.633303	1.52715
							ENSG00000069667	RORA	RAR-related orphan receptor A	0.00514008	4.28804	2.1054		ENSG00000143437	ARNT	aryl hydrocarbon receptor nuclear translocator	0.30605	11.0684	1.52674
							ENSG00000183386	FHL3	four and a half LIM domains 3	0.00113517	7.59568	2.10096		ENSG00000197134	ZNF257	zinc finger protein 257	0.206837	2.34133	1.52639
							ENSG00000196378	ZNF34	zinc finger protein 34	0.0465117	3.75948	2.04964		ENSG00000196247	ZNF107	zinc finger protein 107	0.020271	4.28493	1.5248
							ENSG00000067082	KLF6	Kruppel-like factor 6	0.000116309	18.0613	2.04478		ENSG00000183647	ZNF530	zinc finger protein 530	0.265326	1.65812	1.52171
							ENSG00000103241	FOXF1	forkhead box F1	0.00535798	20.5666	2.01964		ENSG00000167840	ZNF232	zinc finger protein 232	0.0699349	5.72435	1.52155
							ENSG00000159882	ZNF230	zinc finger protein 230	0.0303455	1.59838	2.00723		ENSG00000137871	ZNF280D	zinc finger protein 280D	0.00587869	17.261	1.52082
							ENSG00000152217	SETBP1	SET binding protein 1	7.6e-05	9.6893	2.00678		ENSG00000135747	ZNF670	zinc finger protein 670	0.100347	2.57139	1.51964
														ENSG00000135272	MDFIC	MyoD family inhibitor domain containing	0.0320199	4.63658	1.51874
														ENSG00000147180	ZNF711	zinc finger protein 711	0.00172294	29.8316	1.51853
														ENSG00000197020	ZNF100	zinc finger protein 100	0.0270762	6.97713	1.51616
														ENSG00000180855	ZNF443	zinc finger protein 443	0.117199	3.21785	1.51228
														ENSG00000160685	ZBTB7B	zinc finger and BTB domain containing 7B	0.21285	1.19416	1.5121
														ENSG00000174738	NR1D2	nuclear receptor subfamily 1, group D, member 2	0.0120526	7.87594	1.51126
														ENSG00000177508	IRX3	iroquois homeobox 3	0.0410339	9.39232	1.50679
														ENSG00000184384	MAML2	mastermind-like 2 (Drosophila)	0.0123478	14.6744	1.50454
														ENSG00000136147	PHF11	PHD finger protein 11	0.150265	4.82349	1.50345
														ENSG00000121454	LHX4	LIM homeobox 4	0.407415	1.14863	1.50285
														ENSG00000166432	ZMAT1	zinc finger, matrin type 1	0.0880047	5.87149	1.50196
														ENSG00000196152	ZNF79	zinc finger protein 79	0.42723	1.27453	1.49956
														ENSG00000120738	EGR1	early growth response 1	0.668272	1.91043	1.49507
														ENSG00000206429	ZNRD1	zinc ribbon domain containing 1	0.307612	2.87602	1.49239
														ENSG00000105856	HBP1	HMG-box transcription factor 1	0.0337783	20.0294	1.48794
														ENSG00000167766	ZNF83	zinc finger protein 83	0.123367	5.54512	1.48683
														ENSG00000204498	NFKBIL1	nuclear factor of kappa light polypeptide gene enhancer in B-cells inhibitor-like 1	0.298211	2.52947	1.48598
														ENSG00000163516	ANKZF1	ankyrin repeat and zinc finger domain containing 1	0.184966	9.42388	1.48557
														ENSG00000105722	ERF	Ets2 repressor factor	0.0326383	11.9852	1.48508
														ENSG00000198169	ZNF251	zinc finger protein 251	0.0590813	6.91546	1.48311
														ENSG00000165156	ZHX1	zinc fingers and homeoboxes 1	0.0283672	5.98619	1.48236
														ENSG00000100207	TCF20	transcription factor 20 (AR1)	0.00351477	19.1587	1.48157
														ENSG00000175105	ZNF654	zinc finger protein 654	0.056173	8.20651	1.48135
														ENSG00000095574	IKZF5	IKAROS family zinc finger 5 (Pegasus)	0.061175	4.92915	1.48058
														ENSG00000139083	ETV6	ets variant 6	0.00560866	14.6624	1.47906
														ENSG00000129292	PHF20L1	PHD finger protein 20-like 1	0.0465117	12.2276	1.47544
														ENSG00000197044	ZNF441	zinc finger protein 441	0.243998	2.34166	1.47519
														ENSG00000176024	ZNF613	zinc finger protein 613	0.195134	3.50311	1.4737
														ENSG00000170653	ATF7	activating transcription factor 7	0.293628	60.044	1.47349
														ENSG00000173258	ZNF483	zinc finger protein 483	0.101969	3.81757	1.47289
														ENSG00000101096	NFATC2	nuclear factor of activated T-cells, cytoplasmic, calcineurin-dependent 2	0.178989	1.56097	1.47057
														ENSG00000188629	ZNF177	zinc finger protein 177	0.264081	3.32783	1.47007
														ENSG00000064195	DLX3	distal-less homeobox 3	0.322496	1.55897	1.46683
														ENSG00000180938	ZNF572	zinc finger protein 572	0.285911	1.92539	1.4658
														ENSG00000134532	SOX5	SRY (sex determining region Y)-box 5	0.0103697	35.5961	1.46429
														ENSG00000105497	ZNF175	zinc finger protein 175	0.0693325	5.45253	1.46355
														ENSG00000049246	PER3	period homolog 3 (Drosophila)	0.129296	4.32349	1.46314
														ENSG00000185155	MIXL1	Mix1 homeobox-like 1 (Xenopus laevis)	0.322243	0.56064	1.45626
														ENSG00000101695	RNF125	ring finger protein 125	0.222939	1.69974	1.45098
														ENSG00000105662	CRTC1	CREB regulated transcription coactivator 1	0.0696426	2.52205	1.44488
														ENSG00000197497	ZNF665	zinc finger protein 665	0.203228	2.14163	1.44468
														ENSG00000136866	ZFP37	zinc finger protein 37 homolog (mouse)	0.30534	1.68048	1.43706
														ENSG00000177873	ZNF619	zinc finger protein 619	0.307202	2.55837	1.4347
														ENSG00000157429	ZNF19	zinc finger protein 19	0.315137	1.83015	1.43419
														ENSG00000153560	UBP1	upstream binding protein 1 (LBP-1a)	0.0179562	22.3244	1.43208
														ENSG00000174282	ZBTB4	zinc finger and BTB domain containing 4	0.0507452	9.73099	1.43093
														ENSG00000197124	ZNF682	zinc finger protein 682	0.183339	3.11088	1.427
														ENSG00000119866	BCL11A	B-cell CLL/lymphoma 11A (zinc finger protein)	0.0461776	10.065	1.42626
														ENSG00000178913	TAF7	TAF7 RNA polymerase II, TATA box binding protein (TBP)-associated factor, 55kDa	0.0387029	29.1309	1.42464
														ENSG00000065548	ZC3H15	zinc finger CCCH-type containing 15	0.00852087	52.0516	1.42359
														ENSG00000120690	ELF1	E74-like factor 1 (ets domain transcription factor)	0.0382906	16.9441	1.42337
														ENSG00000174255	ZNF80	zinc finger protein 80	0.452881	0.696483	1.42273
														ENSG00000144218	AFF3	AF4/FMR2 family, member 3	0.0418391	9.96567	1.42038
														ENSG00000105717	PBX4	pre-B-cell leukemia homeobox 4	0.353133	2.13875	1.41872
														ENSG00000065978	YBX1	Y box binding protein 1	0.078783	425.2	1.41729
														ENSG00000155256	ZFYVE27	zinc finger, FYVE domain containing 27	0.237141	2.70472	1.41726
														ENSG00000198440	ZNF583	zinc finger protein 583	0.277768	4.04377	1.41459
														ENSG00000100644	HIF1A	hypoxia inducible factor 1, alpha subunit (basic helix-loop-helix transcription factor)	0.0376134	61.1341	1.41389
														ENSG00000160352	ZNF714	zinc finger protein 714	0.0374792	6.00253	1.41196
														ENSG00000100625	SIX4	SIX homeobox 4	0.0223548	8.00714	1.41167
														ENSG00000166949	SMAD3	SMAD family member 3	0.0186561	23.9308	1.40951
														ENSG00000197961	ZNF121	zinc finger protein 121	0.0843411	14.0478	1.40806
														ENSG00000198346	ZNF813	zinc finger protein 813	0.160891	2.8961	1.40545
														ENSG00000118418	HMGN3	high mobility group nucleosomal binding domain 3	0.0642475	48.3032	1.40067
														ENSG00000169957	ZNF768	zinc finger protein 768	0.14498	6.22602	1.39899
														ENSG00000109787	KLF3	Kruppel-like factor 3 (basic)	0.0274435	17.8765	1.39774
														ENSG00000118922	KLF12	Kruppel-like factor 12	0.0260027	10.1264	1.39742
														ENSG00000130684	ZNF337	zinc finger protein 337	0.123346	8.03143	1.39724
														ENSG00000188171	ZNF626	zinc finger protein 626	0.355074	5.15016	1.3941
														ENSG00000213240	NOTCH2NL	Notch homolog 2 (Drosophila) N-terminal like	0.0332	22.7142	1.39294
														ENSG00000005801	ZNF195	zinc finger protein 195	0.0518645	14.5963	1.3919
														ENSG00000167785	ZNF558	zinc finger protein 558	0.0620701	14.6614	1.38873
														ENSG00000135457	TFCP2	transcription factor CP2	0.404557	23.6654	1.38671
														ENSG00000132326	PER2	period homolog 2 (Drosophila)	0.0926888	4.44026	1.38316
														ENSG00000165891	E2F7	E2F transcription factor 7	0.195443	4.03011	1.38239
														ENSG00000077150	NFKB2	nuclear factor of kappa light polypeptide gene enhancer in B-cells 2 (p49/p100)	0.495754	0.633954	1.38143
														ENSG00000001167	NFYA	nuclear transcription factor Y, alpha	0.0312865	17.7788	1.37907
														ENSG00000197362	ZNF786	zinc finger protein 786	0.385436	1.94317	1.37634
														ENSG00000164684	ZNF704	zinc finger protein 704	0.0351936	11.3388	1.37571
														ENSG00000197063	MAFG	v-maf musculoaponeurotic fibrosarcoma oncogene homolog G (avian)	0.245496	2.03825	1.37541
														ENSG00000167771	RCOR2	REST corepressor 2	0.30447	4.07153	1.37319
														ENSG00000105939	ZC3HAV1	zinc finger CCCH-type, antiviral 1	0.0581085	9.73926	1.37266
														ENSG00000221994	ZNF630	zinc finger protein 630	0.475263	1.41803	1.37222
														ENSG00000005889	ZFX	zinc finger protein, X-linked	0.377993	22.1681	1.37194
														ENSG00000143390	RFX5	regulatory factor X, 5 (influences HLA class II expression)	0.209518	8.06101	1.37049
														ENSG00000185869	ZNF829	zinc finger protein 829	0.246714	2.36047	1.36177
														ENSG00000119950	MXI1	MAX interactor 1	0.297433	21.7637	1.36008
														ENSG00000143458	GABPB2	GA binding protein transcription factor, beta subunit 2	0.241488	6.72055	1.35809
														ENSG00000171606	ZNF274	zinc finger protein 274	0.30752	2.68428	1.35764
														ENSG00000131845	ZNF304	zinc finger protein 304	0.241363	2.99359	1.35764
														ENSG00000179094	PER1	period homolog 1 (Drosophila)	0.428201	1.44636	1.3566
														ENSG00000214114	MYCBP	c-myc binding protein	0.138616	10.845	1.35387
														ENSG00000100219	XBP1	X-box binding protein 1	0.275984	8.94533	1.35099
														ENSG00000130522	JUND	jun D proto-oncogene	0.107876	19.6739	1.34974
														ENSG00000108312	UBTF	upstream binding transcription factor, RNA polymerase I	0.122539	12.9103	1.34952
														ENSG00000102984	ZNF821	zinc finger protein 821	0.403342	2.33086	1.34841
														ENSG00000127903	ZNF835	zinc finger protein 835	0.466499	1.04853	1.34836
														ENSG00000161298	ZNF382	zinc finger protein 382	0.241723	4.46223	1.34808
														ENSG00000197933	ZNF823	zinc finger protein 823	0.381727	2.4595	1.34756
														ENSG00000145908	ZNF300	zinc finger protein 300	0.0602223	15.0381	1.3451
														ENSG00000170100	ZNF778	zinc finger protein 778	0.500924	0.884014	1.345
														ENSG00000166888	STAT6	signal transducer and activator of transcription 6, interleukin-4 induced	0.0710209	9.52115	1.34397
														ENSG00000025156	HSF2	heat shock transcription factor 2	0.218499	8.69475	1.34335
														ENSG00000109381	ELF2	E74-like factor 2 (ets domain transcription factor)	0.0909214	21.2537	1.34144
														ENSG00000152454	ZNF256	zinc finger protein 256	0.276204	5.35373	1.34133
														ENSG00000148200	NR6A1	nuclear receptor subfamily 6, group A, member 1	0.302336	2.67378	1.3413
														ENSG00000081665	ZNF93	zinc finger protein 93	0.137879	12.6958	1.34121
														ENSG00000168310	IRF2	interferon regulatory factor 2	0.216879	9.16011	1.3392
														ENSG00000142409	ZNF787	zinc finger protein 787	0.40895	2.57383	1.33705
														ENSG00000185278	ZBTB37	zinc finger and BTB domain containing 37	0.282812	4.01771	1.3349
														ENSG00000189298	ZKSCAN3	zinc finger with KRAB and SCAN domains 3	0.144126	7.63121	1.33449
														ENSG00000198551	ZNF627	zinc finger protein 627	0.170244	9.37888	1.33403
														ENSG00000173041	ZNF680	zinc finger protein 680	0.482554	1.3174	1.33266
														ENSG00000171295	ZNF440	zinc finger protein 440	0.198397	4.14291	1.33182
														ENSG00000172748	ZNF596	zinc finger protein 596	0.535774	1.0716	1.33178
														ENSG00000172660	TAF15	TAF15 RNA polymerase II, TATA box binding protein (TBP)-associated factor, 68kDa	0.0681663	60.5205	1.32976
														ENSG00000102935	ZNF423	zinc finger protein 423	0.0973924	9.37379	1.32956
														ENSG00000177311	ZBTB38	zinc finger and BTB domain containing 38	0.0483648	12.499	1.32906
														ENSG00000198466	ZNF587	zinc finger protein 587	0.112696	11.0086	1.32833
														ENSG00000116793	PHTF1	putative homeodomain transcription factor 1	0.270904	5.53736	1.32704
														ENSG00000165244	ZNF367	zinc finger protein 367	0.565703	0.902984	1.32646
														ENSG00000214022	REPIN1	replication initiator 1	0.121901	22.1553	1.32604
														ENSG00000141646	SMAD4	SMAD family member 4	0.059167	18.1459	1.32601
														ENSG00000198093	ZNF649	zinc finger protein 649	0.091	13.0857	1.32495
														ENSG00000186020	ZNF529	zinc finger protein 529	0.200231	3.58808	1.32277
														ENSG00000119574	ZBTB45	zinc finger and BTB domain containing 45	0.499207	2.48872	1.32265
														ENSG00000126804	ZBTB1	zinc finger and BTB domain containing 1	0.0875785	10.1418	1.32053
														ENSG00000196387	ZNF140	zinc finger protein 140	0.201879	9.55828	1.31976
														ENSG00000125945	ZNF436	zinc finger protein 436	0.238233	5.19031	1.31958
														ENSG00000179922	ZNF784	zinc finger protein 784	0.491767	2.41428	1.31931
														ENSG00000184271	POU6F1	POU class 6 homeobox 1	0.511147	0.587834	1.31833
														ENSG00000160229	ZNF486	zinc finger protein 486	0.212831	5.11989	1.31781
														ENSG00000198815	FOXJ3	forkhead box J3	0.111012	14.8199	1.31644
														ENSG00000010539	ZNF200	zinc finger protein 200	0.520837	1.93438	1.3164
														ENSG00000179943	FIZ1	FLT3-interacting zinc finger 1	0.389372	2.66471	1.31612
														ENSG00000205250	E2F4	E2F transcription factor 4, p107/p130-binding	0.309276	7.45203	1.31544
														ENSG00000188321	ZNF559	zinc finger protein 559	0.3326	7.21464	1.31507
														ENSG00000186300	ZNF555	zinc finger protein 555	0.264587	2.84898	1.31175
														ENSG00000065970	FOXJ2	forkhead box J2	0.127946	6.62947	1.31161
														ENSG00000165724	ZMYND19	zinc finger, MYND-type containing 19	0.447476	4.64719	1.31109
														ENSG00000083817	ZNF416	zinc finger protein 416	0.439225	2.59758	1.3099
														ENSG00000175727	MLXIP	MLX interacting protein	0.125209	6.70638	1.3097
														ENSG00000153879	CEBPG	CCAAT/enhancer binding protein (C/EBP), gamma	0.238426	10.9544	1.30937
														ENSG00000198265	HELZ	helicase with zinc finger	0.112749	17.4413	1.30865
														ENSG00000160094	ZNF362	zinc finger protein 362	0.091965	16.4596	1.30834
														ENSG00000165462	PHOX2A	paired-like homeobox 2a	0.488252	2.46342	1.30744
														ENSG00000175176	ZNF674	zinc finger family member 674	0.36738	1.96332	1.30715
														ENSG00000196967	ZNF585A	zinc finger protein 585A	0.14623	10.2575	1.30707
														ENSG00000196867	ZFP28	zinc finger protein 28 homolog (mouse)	0.216795	6.09273	1.30571
														ENSG00000204519	ZNF551	zinc finger protein 551	0.215248	5.47238	1.30524
														ENSG00000198176	TFDP1	transcription factor Dp-1	0.0923569	37.742	1.30407
														ENSG00000183621	ZNF438	zinc finger protein 438	0.262251	5.1933	1.30315
														ENSG00000187595	ZNF385C	zinc finger protein 385C	0.575655	0.922586	1.30196
														ENSG00000106546	AHR	aryl hydrocarbon receptor	0.135744	13.3421	1.30125
														ENSG00000166860	ZBTB39	zinc finger and BTB domain containing 39	0.14232	11.781	1.3008
														ENSG00000197928	ZNF677	zinc finger protein 677	0.369354	3.05939	1.29962
														ENSG00000198105	ZNF248	zinc finger protein 248	0.230278	6.96874	1.29949
														ENSG00000144802	NFKBIZ	nuclear factor of kappa light polypeptide gene enhancer in B-cells inhibitor, zeta	0.537909	1.76049	1.29934
														ENSG00000162613	FUBP1	far upstream element (FUSE) binding protein 1	0.133815	98.9542	1.29824
														ENSG00000169251	NMD3	NMD3 homolog (S. cerevisiae)	0.191094	13.7565	1.29775
														ENSG00000181896	ZNF101	zinc finger protein 101	0.481632	3.59747	1.29573
														ENSG00000168228	ZCCHC4	zinc finger, CCHC domain containing 4	0.402531	3.08191	1.29463
														ENSG00000197619	ZNF615	zinc finger protein 615	0.244705	4.8668	1.29384
														ENSG00000123091	RNF11	ring finger protein 11	0.24258	6.71827	1.29366
														ENSG00000148143	ZNF462	zinc finger protein 462	0.190689	44.4598	1.29341
														ENSG00000198839	ZNF277	zinc finger protein 277	0.279157	9.53059	1.2919
														ENSG00000206215	RING1	ring finger protein 1	0.236527	13.6633	1.29183
														ENSG00000124813	RUNX2	runt-related transcription factor 2	0.559669	0.760434	1.29151
														ENSG00000178042	ZNF260	zinc finger protein 260	0.471318	24.2757	1.29072
														ENSG00000126733	DACH2	dachshund homolog 2 (Drosophila)	0.674985	0.804367	1.29058
														ENSG00000197054	ZNF763	zinc finger protein 763	0.356325	4.4801	1.28938
														ENSG00000187187	ZNF546	zinc finger protein 546	0.559096	0.687677	1.2892
														ENSG00000172845	SP3	Sp3 transcription factor	0.0968625	17.735	1.28711
														ENSG00000171970	ZNF57	zinc finger protein 57	0.532974	2.38835	1.28701
														ENSG00000188227	ZNF793	zinc finger protein 793	0.231942	4.24736	1.28583
														ENSG00000176293	ZNF135	zinc finger protein 135	0.568273	5.60634	1.2856
														ENSG00000196705	ZNF431	zinc finger protein 431	0.235593	7.65435	1.28548
														ENSG00000184280	ZNF285	zinc finger protein 285B; zinc finger protein 285A; zinc finger protein 806	0.347477	5.4533	1.28394
														ENSG00000186019	ZNF224	zinc finger protein 224	0.381146	4.45233	1.28351
														ENSG00000171032	ZNF350	zinc finger protein 350	0.396931	5.68492	1.28346
														ENSG00000180787	ZFP3	zinc finger protein 3 homolog (mouse)	0.266628	4.72285	1.2816
														ENSG00000118513	MYB	v-myb myeloblastosis viral oncogene homolog (avian)	0.670556	3.70384	1.28111
														ENSG00000167625	ZNF526	zinc finger protein 526	0.463523	1.873	1.28104
														ENSG00000113658	SMAD5	SMAD family member 5	0.0974899	18.1453	1.28002
														ENSG00000115966	ATF2	activating transcription factor 2	0.490202	102.407	1.27936
														ENSG00000196391	ZNF774	zinc finger protein 774	0.612955	1.66007	1.27915
														ENSG00000139168	ZCRB1	zinc finger CCHC-type and RNA binding motif 1	0.273137	17.0729	1.27828
														ENSG00000074657	ZNF532	similar to zinc finger protein 347; zinc finger protein 532	0.182153	46.9449	1.27822
														ENSG00000189164	ZNF527	zinc finger protein 527	0.386751	2.54225	1.27617
														ENSG00000184481	FOXO4	forkhead box O4	0.463822	2.16106	1.27547
														ENSG00000100105	PATZ1	POZ (BTB) and AT hook containing zinc finger 1	0.360054	4.65533	1.27511
														ENSG00000108406	DHX40	similar to DEAH (Asp-Glu-Ala-His) box polypeptide 40; DEAH (Asp-Glu-Ala-His) box polypeptide 40	0.164018	24.436	1.27385
														ENSG00000074755	ZZEF1	zinc finger, ZZ-type with EF-hand domain 1	0.202524	4.8294	1.27372
														ENSG00000101216	GMEB2	glucocorticoid modulatory element binding protein 2	0.498087	1.45185	1.27366
														ENSG00000103343	ZNF174	zinc finger protein 174	0.541583	1.79451	1.27274
														ENSG00000176887	SOX11	SRY (sex determining region Y)-box 11	0.16883	23.0866	1.27267
														ENSG00000196693	ZNF33B	zinc finger protein 33B	0.216607	11.0321	1.27049
														ENSG00000164442	CITED2	Cbp/p300-interacting transactivator, with Glu/Asp-rich carboxy-terminal domain, 2	0.42723	15.1003	1.26968
														ENSG00000169926	KLF13	Kruppel-like factor 13	0.407541	3.75281	1.26893
														ENSG00000124613	ZNF391	zinc finger protein 391	0.339861	9.04604	1.26781
														ENSG00000124151	NCOA3	nuclear receptor coactivator 3	0.12242	17.4016	1.26746
														ENSG00000196214	ZNF766	zinc finger protein 766	0.389522	5.06041	1.2647
														ENSG00000188342	GTF2F2	general transcription factor IIF, polypeptide 2, 30kDa	0.235336	23.3593	1.26401
														ENSG00000106443	PHF14	PHD finger protein 14	0.116098	14.852	1.26379
														ENSG00000153207	AHCTF1	AT hook containing transcription factor 1; AT hook containing transcription factor 1 pseudogene	0.135695	13.4905	1.26343
														ENSG00000162521	RBBP4	hypothetical LOC642954; retinoblastoma binding protein 4	0.192679	29.948	1.26315
														ENSG00000163435	ELF3	E74-like factor 3 (ets domain transcription factor, epithelial-specific )	0.48845	6.5165	1.26306
														ENSG00000166716	ZNF592	zinc finger protein 592	0.167407	10.4619	1.26217
														ENSG00000215421	ZNF407	zinc finger protein 407	0.539118	2.83172	1.26171
														ENSG00000025434	NR1H3	nuclear receptor subfamily 1, group H, member 3	0.634281	1.84131	1.26016
														ENSG00000198740	ZNF652	zinc finger protein 652	0.134724	10.1131	1.25973
														ENSG00000158805	ZNF276	zinc finger protein 276	0.402027	3.82181	1.25648
														ENSG00000152443	ZNF776	zinc finger protein 776	0.20443	7.44009	1.2564
														ENSG00000197008	ZNF138	zinc finger protein 138	0.36924	6.84732	1.2553
														ENSG00000198131	ZNF544	zinc finger protein 544	0.383648	5.86492	1.25471
														ENSG00000143842	SOX13	SRY (sex determining region Y)-box 13	0.37538	4.05519	1.25432
														ENSG00000171827	ZNF570	zinc finger protein 570	0.413875	5.62707	1.25316
														ENSG00000171163	ZNF692	zinc finger protein 692	0.359566	10.0525	1.25269
														ENSG00000143614	GATAD2B	GATA zinc finger domain containing 2B	0.165895	23.7939	1.25256
														ENSG00000178951	ZBTB7A	zinc finger and BTB domain containing 7A	0.482542	1.93003	1.25192
														ENSG00000157259	GATAD1	GATA zinc finger domain containing 1	0.195611	8.76656	1.25135
														ENSG00000175322	ZNF519	zinc finger protein 519	0.473369	2.66219	1.25069
														ENSG00000122482	ZNF644	zinc finger protein 644	0.164942	28.8903	1.24953
														ENSG00000167491	GATAD2A	GATA zinc finger domain containing 2A	0.271075	13.6097	1.2478
														ENSG00000100426	ZBED4	zinc finger, BED-type containing 4	0.322657	7.92013	1.24681
														ENSG00000140396	NCOA2	nuclear receptor coactivator 2	0.162724	17.8635	1.24668
														ENSG00000198767	YY2	YY2 transcription factor	0.658422	0.912591	1.24658
														ENSG00000169016	E2F6	E2F transcription factor 6	0.382184	4.51149	1.24615
														ENSG00000029363	BCLAF1	similar to Bcl-2-associated transcription factor 1 (Btf); BCL2-associated transcription factor 1	0.216291	299.534	1.24527
														ENSG00000196172	ZNF681	zinc finger protein 681	0.349347	3.77275	1.2439
														ENSG00000152284	TCF7L1	transcription factor 7-like 1 (T-cell specific, HMG-box)	0.308396	20.523	1.24363
														ENSG00000204920	ZNF155	zinc finger protein 155	0.501279	3.96048	1.24237
														ENSG00000126603	GLIS2	GLIS family zinc finger 2	0.423293	4.00332	1.24227
														ENSG00000127081	ZNF484	zinc finger protein 484	0.36816	4.7396	1.24189
														ENSG00000179909	ZNF154	zinc finger protein 154	0.308445	11.3226	1.23899
														ENSG00000155592	ZKSCAN2	zinc finger with KRAB and SCAN domains 2	0.292206	10.7926	1.23848
														ENSG00000204308	RNF5	ring finger protein 5; ring finger protein 5 pseudogene 1	0.3572	25.8067	1.23827
														ENSG00000166337	TAF10	TAF10 RNA polymerase II, TATA box binding protein (TBP)-associated factor, 30kDa	0.436381	16.6223	1.23737
														ENSG00000172819	RARG	retinoic acid receptor, gamma	0.515213	3.10476	1.23731
														ENSG00000156853	ZNF689	zinc finger protein 689	0.586275	2.48089	1.2358
														ENSG00000154957	ZNF18	zinc finger protein 18	0.637756	1.90622	1.23472
														ENSG00000222043	NFE2L2	nuclear factor (erythroid-derived 2)-like 2	0.247842	16.9067	1.23409
														ENSG00000147133	TAF1	TAF1 RNA polymerase II, TATA box binding protein (TBP)-associated factor, 250kDa	0.659541	12.1622	1.23174
														ENSG00000167637	ZNF345	zinc finger protein 345	0.487415	3.45233	1.23096
														ENSG00000169981	ZNF35	zinc finger protein 35	0.465332	5.3319	1.23053
														ENSG00000172262	ZNF131	zinc finger protein 131	0.387853	9.40674	1.23019
														ENSG00000186812	ZNF397	zinc finger protein 397	0.595173	6.81346	1.22966
														ENSG00000174652	ZNF266	zinc finger protein 266	0.51429	9.41044	1.22965
														ENSG00000071564	TCF3	transcription factor 3 (E2A immunoglobulin enhancer binding factors E12/E47)	0.316849	22.0499	1.22848
														ENSG00000145736	GTF2H2C	general transcription factor IIH, polypeptide 2, 44kDa; general transcription factor IIH, polypeptide 2C; general transcription factor IIH, polypeptide 2B; general transcription factor IIH, polypeptide 2D	0.504987	7.0854	1.22788
														ENSG00000111206	FOXM1	forkhead box M1	0.667788	8.86836	1.22615
														ENSG00000178386	ZNF223	zinc finger protein 223	0.570737	3.18116	1.22475
														ENSG00000213020	ZNF611	zinc finger protein 611	0.399161	3.86	1.22428
														ENSG00000198556	ZNF789	zinc finger protein 789	0.652538	4.19559	1.22362
														ENSG00000182568	SATB1	SATB homeobox 1	0.354829	14.6403	1.22332
														ENSG00000171940	ZNF217	zinc finger protein 217	0.306317	9.60471	1.22289
														ENSG00000198026	ZNF335	zinc finger protein 335	0.491767	2.28776	1.22279
														ENSG00000196417	ZNF765	zinc finger protein 765	0.463846	2.91672	1.22212
														ENSG00000214717	ZBED1	zinc finger, BED-type containing 1	0.531701	2.6096	1.22163
														ENSG00000169955	ZNF747	zinc finger protein 747	0.567089	2.81671	1.22109
														ENSG00000198185	ZNF334	zinc finger protein 334	0.369825	6.18297	1.2206
														ENSG00000147789	ZNF7	zinc finger protein 7	0.387397	10.3306	1.22054
														ENSG00000131759	RARA	retinoic acid receptor, alpha	0.505471	3.5484	1.21897
														ENSG00000105866	SP4	Sp4 transcription factor	0.372135	4.62333	1.21878
														ENSG00000167384	ZNF180	zinc finger protein 180	0.525241	3.44566	1.21801
														ENSG00000064490	RFXANK	regulatory factor X-associated ankyrin-containing protein	0.572622	6.13494	1.21701
														ENSG00000145736	GTF2H2	general transcription factor IIH, polypeptide 2, 44kDa; general transcription factor IIH, polypeptide 2C; general transcription factor IIH, polypeptide 2B; general transcription factor IIH, polypeptide 2D	0.566874	6.6607	1.21694
														ENSG00000174586	ZNF497	zinc finger protein 497	0.71012	0.574997	1.21615
														ENSG00000181007	ZFP82	zinc finger protein 82 homolog (mouse)	0.491684	5.1327	1.21551
														ENSG00000205189	ZBTB10	zinc finger and BTB domain containing 10	0.285983	10.4582	1.21512
														ENSG00000168826	ZBTB49	zinc finger protein 509	0.557486	3.06813	1.21377
														ENSG00000159915	ZNF233	zinc finger protein 233	0.642478	1.93217	1.21358
														ENSG00000114125	RNF7	ring finger protein 7	0.683868	4.2769	1.21192
														ENSG00000168661	ZNF30	zinc finger protein 30	0.62204	1.74971	1.20885
														ENSG00000141510	TP53	tumor protein p53	0.568273	10.1984	1.20747
														ENSG00000186026	ZNF284	zinc finger protein 284	0.594271	3.21273	1.20681
														ENSG00000154727	GABPA	GA binding protein transcription factor, alpha subunit 60kDa	0.405457	5.19676	1.20662
														ENSG00000104064	GABPB1	GA binding protein transcription factor, beta subunit 1	0.525062	6.1254	1.20659
														ENSG00000173153	ESRRA	estrogen-related receptor alpha	0.535244	4.14181	1.20583
														ENSG00000197863	ZNF790	zinc finger protein 790	0.609548	2.56215	1.20427
														ENSG00000165821	SALL2	sal-like 2 (Drosophila)	0.358274	14.7467	1.20417
														ENSG00000063978	RNF4	ring finger protein 4; hypothetical LOC644006	0.624533	35.318	1.20364
														ENSG00000128016	ZFP36	zinc finger protein 36, C3H type, homolog (mouse)	0.623543	3.01538	1.20346
														ENSG00000137947	GTF2B	general transcription factor IIB	0.456421	11.4505	1.20343
														ENSG00000142065	ZFP14	zinc finger protein 14 homolog (mouse)	0.401532	4.09689	1.20301
														ENSG00000184517	ZFP1	zinc finger protein 1 homolog (mouse)	0.523833	4.34235	1.20228
														ENSG00000138942	RNF185	ring finger protein 185	0.447213	8.55412	1.20172
														ENSG00000166140	ZFYVE19	zinc finger, FYVE domain containing 19	0.626258	2.37462	1.2009
														ENSG00000143373	ZNF687	zinc finger protein 687	0.504923	3.90307	1.20026
														ENSG00000126368	NR1D1	nuclear receptor subfamily 1, group D, member 1	0.634347	2.76218	1.19999
														ENSG00000115415	STAT1	signal transducer and activator of transcription 1, 91kDa	0.503389	9.38396	1.19914
														ENSG00000110768	GTF2H1	general transcription factor IIH, polypeptide 1, 62kDa	0.445432	5.83535	1.19792
														ENSG00000213297	ZNF625	zinc finger protein 625	0.525687	9.65173	1.19718
														ENSG00000185697	MYBL1	v-myb myeloblastosis viral oncogene homolog (avian)-like 1	0.647093	1.51312	1.19701
														ENSG00000162702	ZNF281	zinc finger protein 281	0.457301	12.8914	1.19671
														ENSG00000172466	ZNF24	zinc finger protein 24	0.274008	26.1565	1.19561
														ENSG00000160961	ZNF333	zinc finger protein 333	0.611112	2.06407	1.19531
														ENSG00000163481	RNF25	ring finger protein 25	0.660262	2.98123	1.19383
														ENSG00000140265	ZSCAN29	zinc finger and SCAN domain containing 29	0.403244	10.0944	1.19355
														ENSG00000180626	ZNF594	zinc finger protein 594	0.541299	3.83634	1.19309
														ENSG00000215760	TAF9B	TAF9B RNA polymerase II, TATA box binding protein (TBP)-associated factor, 31kDa	0.342343	17.3104	1.19281
														ENSG00000170581	STAT2	signal transducer and activator of transcription 2, 113kDa	0.339072	8.90303	1.19237
														ENSG00000056277	ZNF280C	zinc finger protein 280C	0.338717	9.78249	1.19193
														ENSG00000170260	ZNF212	zinc finger protein 212	0.569396	3.80759	1.19042
														ENSG00000213676	ATF6B	activating transcription factor 6 beta	0.45189	13.5971	1.18995
														ENSG00000197800	ZNF585B	zinc finger protein 585B	0.369354	6.63521	1.18983
														ENSG00000132010	ZNF20	zinc finger protein 20	0.634347	2.37895	1.18927
														ENSG00000089902	RCOR1	REST corepressor 1	0.342343	18.2865	1.18912
														ENSG00000187792	ZNF70	zinc finger protein 70	0.510894	4.56368	1.18815
														ENSG00000184677	ZBTB40	zinc finger and BTB domain containing 40	0.43134	5.34667	1.18778
														ENSG00000131061	ZNF341	zinc finger protein 341	0.740793	0.54841	1.18734
														ENSG00000167380	ZNF226	zinc finger protein 226	0.49461	10.1238	1.18568
														ENSG00000213688	FOXO3	forkhead box O3; forkhead box O3B pseudogene	0.346653	21.4169	1.18548
														ENSG00000169740	ZNF32	zinc finger protein 32	0.548243	11.2602	1.18435
														ENSG00000198554	WDHD1	WD repeat and HMG-box DNA binding protein 1	0.320515	19.2581	1.18427
														ENSG00000072121	ZFYVE26	zinc finger, FYVE domain containing 26	0.504107	3.90218	1.18381
														ENSG00000090447	TFAP4	transcription factor AP-4 (activating enhancer binding protein 4)	0.728815	1.20141	1.18315
														ENSG00000144026	ZNF514	zinc finger protein 514	0.463523	10.0638	1.18278
														ENSG00000159904	ZNF225	zinc finger protein 225	0.571375	4.17691	1.18259
														ENSG00000015171	ZMYND11	zinc finger, MYND domain containing 11	0.382694	21.9867	1.18192
														ENSG00000131408	NR1H2	nuclear receptor subfamily 1, group H, member 2	0.726201	1.21462	1.18175
														ENSG00000177853	ZNF518A	zinc finger protein 518A	0.384918	8.58779	1.18124
														ENSG00000172273	HINFP	histone H4 transcription factor	0.544387	6.75015	1.18067
														ENSG00000198342	ZNF442	zinc finger protein 442	0.710716	1.73829	1.18061
														ENSG00000198298	ZNF485	zinc finger protein 485	0.721468	3.31003	1.17903
														ENSG00000185730	ZNF696	zinc finger protein 696	0.594134	2.51118	1.17903
														ENSG00000117625	RCOR3	REST corepressor 3	0.606227	18.9618	1.17901
														ENSG00000130544	ZNF557	zinc finger protein 557	0.521261	3.01539	1.17882
														ENSG00000117595	IRF6	interferon regulatory factor 6	0.536686	7.80302	1.17868
														ENSG00000196453	ZNF777	zinc finger protein 777	0.639554	2.38548	1.1784
														ENSG00000081386	ZNF510	zinc finger protein 510	0.522279	4.11629	1.17798
														ENSG00000125952	MAX	MYC associated factor X	0.539432	28.6635	1.17792
														ENSG00000197128	ZNF772	zinc finger protein 772	0.40674	8.03609	1.17602
														ENSG00000066827	ZFAT	zinc finger and AT hook domain containing	0.60421	2.81151	1.17596
														ENSG00000143621	ILF2	interleukin enhancer binding factor 2, 45kDa	0.588542	101.793	1.17562
														ENSG00000112365	ZBTB24	zinc finger and BTB domain containing 24	0.427698	10.7524	1.17537
														ENSG00000106459	NRF1	nuclear respiratory factor 1	0.652363	3.61354	1.17296
														ENSG00000186260	MKL2	MKL/myocardin-like 2	0.353103	15.8319	1.17289
														ENSG00000101040	ZMYND8	zinc finger, MYND-type containing 8	0.680261	20.5622	1.17285
														ENSG00000196437	ZNF569	zinc finger protein 569	0.678487	1.53497	1.17262
														ENSG00000177888	ZBTB41	zinc finger and BTB domain containing 41	0.458667	4.99402	1.17226
														ENSG00000162300	ZFPL1	zinc finger protein-like 1	0.675808	4.0992	1.17204
														ENSG00000158717	RNF166	ring finger protein 166	0.726079	1.74026	1.17201
														ENSG00000148835	TAF5	TAF5 RNA polymerase II, TATA box binding protein (TBP)-associated factor, 100kDa	0.626253	2.80213	1.17152
														ENSG00000142556	ZNF614	zinc finger protein 614	0.414135	8.65215	1.17087
														ENSG00000186130	ZBTB6	zinc finger and BTB domain containing 6	0.550304	4.39786	1.16943
														ENSG00000131849	ZNF132	zinc finger protein 132	0.618323	3.31444	1.16751
														ENSG00000196782	MAML3	mastermind-like 3 (Drosophila)	0.403817	7.09074	1.16714
														ENSG00000161551	ZNF577	zinc finger protein 577	0.624565	4.12539	1.16703
														ENSG00000188994	ZNF292	zinc finger protein 292	0.581007	32.7361	1.167
														ENSG00000144792	ZNF660	zinc finger protein 660	0.613984	6.59667	1.16661
														ENSG00000177045	SIX5	SIX homeobox 5	0.686251	3.57904	1.16647
														ENSG00000221895	ZNF578	zinc finger protein 578	0.645069	3.13187	1.16612
														ENSG00000169136	ATF6	activating transcription factor 6	0.440467	12.0404	1.16593
														ENSG00000122565	CBX3	similar to chromobox homolog 3; chromobox homolog 3 (HP1 gamma homolog, Drosophila)	0.371644	53.8127	1.16532
														ENSG00000177764	ZCCHC3	zinc finger, CCHC domain containing 3	0.533735	10.8867	1.1653
														ENSG00000213347	MXD3	MAX dimerization protein 3	0.725349	2.47301	1.16499
														ENSG00000128272	ATF4	activating transcription factor 4 (tax-responsive enhancer element B67); activating transcription factor 4C	0.561216	18.8615	1.16496
														ENSG00000092203	TOX4	TOX high mobility group box family member 4	0.366331	29.6122	1.16482
														ENSG00000181827	RFX7	regulatory factor X, 7	0.437326	30.6306	1.1645
														ENSG00000123411	IKZF4	IKAROS family zinc finger 4 (Eos)	0.538917	4.34801	1.16427
														ENSG00000197937	ZNF347	zinc finger protein 347	0.59589	3.85354	1.1624
														ENSG00000188295	ZNF669	zinc finger protein 669	0.687168	3.71329	1.16224
														ENSG00000215383	ZNF718	zinc finger protein 718	0.653175	4.44471	1.16082
														ENSG00000146007	ZMAT2	zinc finger, matrin type 2	0.498039	22.8828	1.15982
														ENSG00000129654	FOXJ1	forkhead box J1	0.703983	2.76562	1.15965
														ENSG00000173875	ZNF791	zinc finger protein 791	0.606227	6.36695	1.15965
														ENSG00000160062	ZBTB8A	zinc finger and BTB domain containing 8A	0.544236	3.95563	1.15832
														ENSG00000118707	TGIF2	TGFB-induced factor homeobox 2	0.474714	11.7376	1.15795
														ENSG00000140307	GTF2A2	general transcription factor IIA, 2, 12kDa	0.527203	15.5746	1.15764
														ENSG00000169131	ZNF354A	zinc finger protein 354A	0.604217	5.64992	1.15757
														ENSG00000196267	ZNF836	zinc finger protein 836	0.704973	2.27561	1.15666
														ENSG00000083844	ZNF264	zinc finger protein 264	0.485164	5.88459	1.15665
														ENSG00000131263	RLIM	ring finger protein, LIM domain interacting; similar to ring finger protein (C3H2C3 type) 6	0.40844	10.2932	1.15583
														ENSG00000153767	GTF2E1	general transcription factor IIE, polypeptide 1, alpha 56kDa	0.645621	3.78153	1.15582
														ENSG00000186272	ZNF17	zinc finger protein 17	0.668872	3.39127	1.15575
														ENSG00000139651	ZNF740	zinc finger protein 740	0.495502	9.11155	1.15556
														ENSG00000162714	ZNF496	zinc finger protein 496	0.729659	2.01648	1.15498
														ENSG00000129514	FOXA1	forkhead box A1	0.520477	23.4923	1.15482
														ENSG00000165417	GTF2A1	general transcription factor IIA, 1, 19/37kDa	0.501084	10.0321	1.15385
														ENSG00000005339	CREBBP	CREB binding protein	0.499496	31.0216	1.1536
														ENSG00000213762	ZNF134	zinc finger protein 134	0.580074	11.3555	1.15354
														ENSG00000215271	HOMEZ	homeobox and leucine zipper encoding	0.671634	5.82961	1.15301
														ENSG00000153975	ZUFSP	zinc finger with UFM1-specific peptidase domain	0.700681	3.02296	1.15283
														ENSG00000143190	POU2F1	POU class 2 homeobox 1	0.476778	18.3479	1.15137
														ENSG00000171448	ZBTB26	zinc finger and BTB domain containing 26	0.620512	7.05535	1.15136
														ENSG00000127152	BCL11B	B-cell CLL/lymphoma 11B (zinc finger protein)	0.627924	2.37202	1.15115
														ENSG00000188033	ZNF490	zinc finger protein 490	0.542122	4.54266	1.15101
														ENSG00000167685	ZNF444	zinc finger protein 444	0.661894	7.71984	1.151
														ENSG00000162419	GMEB1	glucocorticoid modulatory element binding protein 1	0.778762	4.8639	1.15095
														ENSG00000080298	RFX3	regulatory factor X, 3 (influences HLA class II expression)	0.783955	2.08086	1.1506
														ENSG00000166135	HIF1AN	hypoxia inducible factor 1, alpha subunit inhibitor	0.524338	8.5301	1.14893
														ENSG00000179059	ZFP42	zinc finger protein 42 homolog (mouse)	0.672842	4.22093	1.1487
														ENSG00000173480	ZNF417	zinc finger protein 417	0.511854	7.42132	1.14847
														ENSG00000124766	SOX4	SRY (sex determining region Y)-box 4	0.490884	49.4275	1.14718
														ENSG00000178338	ZNF354B	zinc finger protein 354B	0.635604	7.18275	1.14707
														ENSG00000107164	FUBP3	far upstream element (FUSE) binding protein 3	0.568692	9.8065	1.147
														ENSG00000158711	ELK4	ELK4, ETS-domain protein (SRF accessory protein 1)	0.543252	4.12947	1.14645
														ENSG00000108788	MLX	MAX-like protein X	0.583342	14.1909	1.14435
														ENSG00000204946	ZNF783	zinc finger family member 783	0.741779	1.30609	1.14378
														ENSG00000106261	ZKSCAN1	zinc finger with KRAB and SCAN domains 1	0.509357	35.1606	1.14355
														ENSG00000105750	ZNF85	zinc finger protein 85	0.634281	6.66936	1.14294
														ENSG00000167377	ZNF23	zinc finger protein 23 (KOX 16)	0.744071	3.92993	1.14234
														ENSG00000114861	FOXP1	forkhead box P1	0.748986	6.79442	1.1422
														ENSG00000204859	ZBTB48	zinc finger and BTB domain containing 48	0.742752	3.23777	1.14218
														ENSG00000198521	ZNF43	zinc finger protein 43	0.506968	8.71105	1.1413
														ENSG00000163602	RYBP	RING1 and YY1 binding protein	0.504889	20.5545	1.14112
														ENSG00000171466	ZNF562	zinc finger protein 562	0.484426	15.9547	1.14034
														ENSG00000189144	ZNF573	zinc finger protein 573	0.769296	1.98312	1.14027
														ENSG00000146757	ZNF92	zinc finger protein 92	0.600694	7.64942	1.14016
														ENSG00000126561	STAT5A	signal transducer and activator of transcription 5A	0.819907	0.408397	1.13997
														ENSG00000169260	ZNF311	zinc finger protein 311	0.727817	3.1029	1.13975
														ENSG00000086102	NFX1	nuclear transcription factor, X-box binding 1	0.583036	9.5009	1.13959
														ENSG00000167967	E4F1	E4F transcription factor 1	0.803894	1.57734	1.13939
														ENSG00000159885	ZNF222	zinc finger protein 222	0.823635	1.61848	1.1392
														ENSG00000146587	RBAK	hypothetical LOC389458; RB-associated KRAB zinc finger	0.512186	6.39574	1.13831
														ENSG00000113761	ZNF346	zinc finger protein 346	0.63667	5.35537	1.13821
														ENSG00000160908	ZNF394	zinc finger protein 394	0.683152	5.31907	1.13777
														ENSG00000072364	AFF4	AF4/FMR2 family, member 4	0.558498	23.1948	1.13651
														ENSG00000197782	ZNF780A	zinc finger protein 780A	0.633755	5.50547	1.13536
														ENSG00000168795	ZBTB5	zinc finger and BTB domain containing 5	0.556858	12.0067	1.13535
														ENSG00000177732	SOX12	SRY (sex determining region Y)-box 12	0.66275	5.71132	1.13457
														ENSG00000167635	ZNF146	zinc finger protein 146	0.47197	32.7617	1.13327
														ENSG00000177932	ZNF354C	zinc finger protein 354C	0.662175	7.98939	1.13249
														ENSG00000157657	ZNF618	zinc finger protein 618	0.501054	15.4544	1.13211
														ENSG00000137166	FOXP4	forkhead box P4	0.675974	28.0723	1.13195
														ENSG00000125812	GZF1	GDNF-inducible zinc finger protein 1	0.68177	3.10576	1.13078
														ENSG00000083828	ZNF586	zinc finger protein 586	0.668872	9.25463	1.13032
														ENSG00000163848	ZNF148	zinc finger protein 148	0.524474	9.72252	1.12998
														ENSG00000160563	MED27	similar to cofactor required for Sp1 transcriptional activation, subunit 8, 34kDa; mediator complex subunit 27; CRSP8 pseudogene	0.748986	5.31333	1.12934
														ENSG00000213988	ZNF253	zinc finger protein 253	0.546225	17.5132	1.12867
														ENSG00000014164	ZC3H3	zinc finger CCCH-type containing 3	0.783466	1.71768	1.12817
														ENSG00000121413	ZSCAN18	zinc finger and SCAN domain containing 18	0.668655	10.0266	1.12694
														ENSG00000111358	GTF2H3	general transcription factor IIH, polypeptide 3, 34kDa	0.68	4.81858	1.12686
														ENSG00000121988	ZRANB3	zinc finger, RAN-binding domain containing 3	0.686121	4.47451	1.12662
														ENSG00000182986	ZNF320	zinc finger protein 320	0.639052	4.94224	1.12649
														ENSG00000102241	HTATSF1	HIV-1 Tat specific factor 1	0.703201	32.3041	1.12649
														ENSG00000184939	ZFP90	zinc finger protein 90 homolog (mouse)	0.579789	12.7748	1.12527
														ENSG00000119041	GTF3C3	general transcription factor IIIC, polypeptide 3, 102kDa	0.62918	10.9415	1.12527
														ENSG00000064313	TAF2	TAF2 RNA polymerase II, TATA box binding protein (TBP)-associated factor, 150kDa	0.599089	13.4628	1.12309
														ENSG00000170949	ZNF160	zinc finger protein 160	0.649235	11.0266	1.12292
														ENSG00000138386	NAB1	NGFI-A binding protein 1 (EGR1 binding protein 1)	0.556899	11.1045	1.12278
														ENSG00000166529	ZSCAN21	zinc finger and SCAN domain containing 21	0.688116	8.28326	1.12267
														ENSG00000106290	TAF6	TAF6 RNA polymerase II, TATA box binding protein (TBP)-associated factor, 80kDa	0.683133	6.72978	1.12179
														ENSG00000205581	HMGN1	high-mobility group nucleosome binding domain 1	0.547715	127.727	1.12134
														ENSG00000102870	ZNF629	zinc finger protein 629	0.642422	6.19809	1.12107
														ENSG00000147124	ZNF41	zinc finger protein 41	0.677853	4.7754	1.12076
														ENSG00000167395	ZNF646	zinc finger protein 646	0.786192	1.07003	1.11876
														ENSG00000182318	ZSCAN22	zinc finger and SCAN domain containing 22	0.748661	2.47516	1.11722
														ENSG00000196456	ZNF775	zinc finger protein 775	0.748661	5.14125	1.11704
														ENSG00000187607	ZNF286A	zinc finger protein 286A	0.588356	9.1619	1.117
														ENSG00000178187	ZNF454	zinc finger protein 454	0.773648	3.63866	1.11684
														ENSG00000198522	ZNF512	zinc finger protein 512	0.826008	22.2821	1.11656
														ENSG00000206247	PBX2	pre-B-cell leukemia homeobox 2	0.595173	42.1457	1.11586
														ENSG00000138073	PREB	prolactin regulatory element binding	0.776287	4.80413	1.11584
														ENSG00000125651	GTF2F1	general transcription factor IIF, polypeptide 1, 74kDa	0.600155	16.3598	1.11547
														ENSG00000221849	ZNF584	zinc finger protein 584	0.806543	2.09954	1.11516
														ENSG00000204366	ZBTB12	zinc finger and BTB domain containing 12	0.852341	1.33552	1.11477
														ENSG00000206366	ZBTB12	zinc finger and BTB domain containing 12	0.852341	1.33552	1.11477
														ENSG00000161853	ZBTB12	zinc finger and BTB domain containing 12	0.852341	1.33552	1.11477
														ENSG00000085644	ZNF213	zinc finger protein 213	0.792939	2.00234	1.11372
														ENSG00000115816	CEBPZ	CCAAT/enhancer binding protein (C/EBP), zeta	0.700908	24.8939	1.11325
														ENSG00000120784	ZFP30	zinc finger protein 30 homolog (mouse)	0.737927	2.5151	1.11238
														ENSG00000088876	ZNF343	zinc finger protein 343	0.696192	4.90083	1.11168
														ENSG00000198040	ZNF84	zinc finger protein 84	0.625951	11.4763	1.11024
														ENSG00000100387	RBX1	ring-box 1	0.642915	45.2557	1.10951
														ENSG00000197162	ZNF688	zinc finger protein 688; zinc finger protein 785	0.836816	1.24402	1.10931
														ENSG00000083838	ZNF446	zinc finger protein 446	0.838634	1.01928	1.1092
														ENSG00000152433	ZNF547	zinc finger protein 547	0.877245	0.81066	1.10865
														ENSG00000198455	ZXDB	zinc finger, X-linked, duplicated B	0.639614	8.33844	1.10781
														ENSG00000177463	NR2C2	nuclear receptor subfamily 2, group C, member 2	0.585164	11.7573	1.10779
														ENSG00000151963	ZNF268	zinc finger protein 268	0.693501	6.20418	1.10756
														ENSG00000198939	ZFP2	zinc finger protein 2 homolog (mouse)	0.832559	1.62101	1.10706
														ENSG00000180884	ZNF792	zinc finger protein 792	0.759795	3.31724	1.10664
														ENSG00000156531	PHF6	PHD finger protein 6	0.835457	7.30614	1.10662
														ENSG00000134758	RNF138	ring finger protein 138	0.761708	2.99292	1.10553
														ENSG00000112249	ASCC3	activating signal cointegrator 1 complex subunit 3	0.631176	13.0451	1.10548
														ENSG00000067646	ZFY	zinc finger protein, Y-linked	0.895136	1.23325	1.10531
														ENSG00000119725	ZNF410	zinc finger protein 410	0.83911	4.79378	1.10459
														ENSG00000065029	ZNF76	zinc finger protein 76 (expressed in testis)	0.772188	3.97873	1.10354
														ENSG00000158691	ZSCAN12	zinc finger and SCAN domain containing 12	0.734732	9.00718	1.10332
														ENSG00000189180	ZNF33A	zinc finger protein 33A	0.857143	16.429	1.10263
														ENSG00000120693	SMAD9	SMAD family member 9	0.716961	7.38827	1.10231
														ENSG00000142528	ZNF473	zinc finger protein 473	0.712019	5.18154	1.09987
														ENSG00000175352	NRIP3	nuclear receptor interacting protein 3	0.844784	1.13997	1.09954
														ENSG00000196605	ZNF846	zinc finger protein 846	0.83758	2.75935	1.09941
														ENSG00000198538	ZNF28	zinc finger protein 28	0.725909	6.14873	1.09927
														ENSG00000095951	HIVEP1	human immunodeficiency virus type I enhancer binding protein 1	0.624974	12.7579	1.09791
														ENSG00000167555	ZNF528	zinc finger protein 534; zinc finger protein 528	0.75806	6.41974	1.09788
														ENSG00000089775	ZBTB25	zinc finger and BTB domain containing 25	0.792939	6.38619	1.09748
														ENSG00000103199	ZNF500	zinc finger protein 500	0.870549	1.16592	1.09676
														ENSG00000070047	PHRF1	PHD and ring finger domains 1	0.798116	2.28976	1.09613
														ENSG00000166704	ZNF606	zinc finger protein 606	0.696192	9.50078	1.09574
														ENSG00000131127	ZNF141	zinc finger protein 141	0.732864	13.6724	1.09564
														ENSG00000196268	ZNF493	zinc finger protein 493	0.88738	1.84185	1.09513
														ENSG00000128000	ZNF780B	zinc finger protein 780B	0.730598	3.02042	1.09438
														ENSG00000070476	ZXDC	ZXD family zinc finger C	0.714421	12.3698	1.09357
														ENSG00000131115	ZNF227	zinc finger protein 227	0.761551	6.72642	1.09342
														ENSG00000036549	ZZZ3	zinc finger, ZZ-type containing 3	0.703382	15.514	1.09339
														ENSG00000130584	ZBTB46	zinc finger and BTB domain containing 46	0.88314	0.803646	1.0933
														ENSG00000196482	ESRRG	estrogen-related receptor gamma	0.861772	1.85971	1.09304
														ENSG00000197779	ZNF81	zinc finger protein 81	0.783955	3.02697	1.09301
														ENSG00000112242	E2F3	E2F transcription factor 3	0.864222	10.0384	1.09284
														ENSG00000178764	ZHX2	zinc fingers and homeoboxes 2	0.737502	16.2991	1.09268
														ENSG00000197024	ZNF398	zinc finger protein 398	0.75806	3.86179	1.09263
														ENSG00000186017	ZNF566	zinc finger protein 566	0.78234	2.63194	1.09247
														ENSG00000130844	ZNF331	zinc finger protein 331	0.779334	3.38464	1.09181
														ENSG00000165659	DACH1	dachshund homolog 1 (Drosophila)	0.890983	1.13183	1.09094
														ENSG00000167528	ZNF641	zinc finger protein 641	0.718039	9.0854	1.09038
														ENSG00000030419	IKZF2	IKAROS family zinc finger 2 (Helios)	0.732138	3.76706	1.0894
														ENSG00000105698	USF2	upstream transcription factor 2, c-fos interacting	0.802383	8.44314	1.08874
														ENSG00000100811	YY1	YY1 transcription factor	0.693285	15.8764	1.0874
														ENSG00000100393	EP300	E1A binding protein p300	0.727674	43.2711	1.08722
														ENSG00000071794	HLTF	helicase-like transcription factor	0.733851	16.3618	1.08585
														ENSG00000165512	ZNF22	zinc finger protein 22 (KOX 15)	0.723822	32.1163	1.08544
														ENSG00000186416	NKRF	NFKB repressing factor	0.89015	3.99799	1.08541
														ENSG00000130856	ZNF236	zinc finger protein 236	0.70865	5.10362	1.08488
														ENSG00000181450	ZNF678	zinc finger protein 678	0.713011	6.25811	1.08467
														ENSG00000198205	ZXDA	zinc finger, X-linked, duplicated A	0.804676	3.13059	1.08304
														ENSG00000114439	BBX	bobby sox homolog (Drosophila)	0.76043	14.8914	1.08231
														ENSG00000147118	ZNF182	zinc finger protein 182	0.793045	4.63205	1.08215
														ENSG00000141027	NCOR1	nuclear receptor co-repressor 1	0.767915	24.8675	1.08077
														ENSG00000118620	ZNF430	zinc finger protein 430	0.79168	5.06024	1.08032
														ENSG00000106400	ZNHIT1	zinc finger, HIT type 1	0.83911	8.50331	1.07965
														ENSG00000196826	ZNF709	zinc finger protein 709	0.844177	2.20355	1.07858
														ENSG00000181220	ZNF746	zinc finger protein 746	0.826767	4.11572	1.07817
														ENSG00000188786	MTF1	metal-regulatory transcription factor 1	0.771334	4.06181	1.07814
														ENSG00000171469	ZNF812	zinc finger protein 561; zinc finger protein 812	0.888841	0.658582	1.07798
														ENSG00000182983	ZNF662	zinc finger protein 662	0.747254	7.67861	1.07729
														ENSG00000186448	ZNF197	zinc finger protein 197	0.789866	6.1554	1.0772
														ENSG00000185591	SP1	Sp1 transcription factor	0.748358	32.3063	1.07622
														ENSG00000170365	SMAD1	SMAD family member 1	0.773249	12.2775	1.07611
														ENSG00000196150	ZNF250	zinc finger protein 250	0.836401	1.88366	1.07586
														ENSG00000112200	ZNF451	zinc finger protein 451	0.798724	10.334	1.07537
														ENSG00000213096	ZNF254	zinc finger protein 254	0.861404	24.1782	1.0751
														ENSG00000178229	ZNF543	zinc finger protein 543	0.819252	4.1549	1.0748
														ENSG00000153896	ZNF599	zinc finger protein 599	0.917163	0.599314	1.07475
														ENSG00000186350	RXRA	retinoid X receptor, alpha	0.806374	5.32622	1.07407
														ENSG00000124160	NCOA5	nuclear receptor coactivator 5	0.814693	20.5689	1.07407
														ENSG00000082641	NFE2L1	nuclear factor (erythroid-derived 2)-like 1	0.756558	18.4239	1.07305
														ENSG00000141568	FOXK2	forkhead box K2	0.770617	9.5016	1.07226
														ENSG00000196757	ZNF700	zinc finger protein 700	0.840428	6.43861	1.07135
														ENSG00000128272	ATF5	activating transcription factor 5	0.887854	3.96587	1.0705
														ENSG00000166478	ZNF143	zinc finger protein 143	0.823549	6.26644	1.07038
														ENSG00000169249	ZRSR2	zinc finger (CCCH type), RNA-binding motif and serine/arginine rich 2	0.873901	7.00642	1.06971
														ENSG00000115568	ZNF142	zinc finger protein 142	0.822959	5.19428	1.06906
														ENSG00000221897	ZNF432	zinc finger protein 432	0.875244	7.52556	1.06887
														ENSG00000134452	FBXO18	F-box protein, helicase, 18	0.792557	10.3545	1.0686
														ENSG00000100906	NFKBIA	nuclear factor of kappa light polypeptide gene enhancer in B-cells inhibitor, alpha	0.865974	9.17449	1.06793
														ENSG00000197808	ZNF461	zinc finger protein 461	0.889081	1.99242	1.06776
														ENSG00000180035	ZNF48	zinc finger protein 48	0.902147	3.73737	1.06763
														ENSG00000197701	ZNF595	zinc finger protein 595	0.816368	7.40076	1.06758
														ENSG00000152926	ZNF117	zinc finger protein 117	0.792666	10.1513	1.06721
														ENSG00000136944	LMX1B	LIM homeobox transcription factor 1, beta	0.891707	0.844756	1.06648
														ENSG00000177125	ZBTB34	zinc finger and BTB domain containing 34	0.798127	8.49324	1.06566
														ENSG00000171649	ZIK1	zinc finger protein interacting with K protein 1 homolog (mouse)	0.832594	6.71444	1.06552
														ENSG00000121481	RNF2	ring finger protein 2	0.830216	7.22402	1.06515
														ENSG00000185670	ZBTB3	zinc finger and BTB domain containing 3	0.890815	1.63971	1.06507
														ENSG00000163067	ZNF2	zinc finger protein 2	0.862173	3.41803	1.06409
														ENSG00000168813	ZNF507	zinc finger protein 507	0.799602	12.4028	1.06379
														ENSG00000185057	TAF9	TAF9 RNA polymerase II, TATA box binding protein (TBP)-associated factor, 32kDa	0.826767	21.0657	1.06365
														ENSG00000198816	ZNF358	zinc finger protein 358	0.872384	5.28099	1.06356
														ENSG00000204947	ZNF425	zinc finger protein 425	0.901365	2.38294	1.06348
														ENSG00000179195	ZNF664	zinc finger protein 664	0.909375	28.5593	1.06322
														ENSG00000169155	ZBTB43	zinc finger and BTB domain containing 43	0.836816	4.26286	1.06295
														ENSG00000164916	FOXK1	forkhead box K1	0.836816	7.24062	1.06221
														ENSG00000169714	CNBP	CCHC-type zinc finger, nucleic acid binding protein	0.772688	48.3682	1.06202
														ENSG00000108557	RAI1	retinoic acid induced 1	0.815626	7.20088	1.06177
														ENSG00000204524	ZNF805	zinc finger protein 805	0.818353	6.70117	1.0614
														ENSG00000185947	ZNF267	zinc finger protein 267	0.863136	3.91283	1.06108
														ENSG00000083842	ZNF8	zinc finger protein 8	0.870039	5.72707	1.06037
														ENSG00000188868	ZNF563	zinc finger protein 563	0.916885	0.705814	1.05991
														ENSG00000132485	ZRANB2	zinc finger, RAN-binding domain containing 2	0.799042	32.3545	1.05961
														ENSG00000197265	GTF2E2	general transcription factor IIE, polypeptide 2, beta 34kDa	0.851605	12.0314	1.05947
														ENSG00000171291	ZNF439	zinc finger protein 439	0.858354	6.022	1.05904
														ENSG00000158773	USF1	upstream transcription factor 1	0.895804	4.03527	1.05842
														ENSG00000172888	ZNF621	zinc finger protein 621	0.808055	5.82106	1.05828
														ENSG00000102974	CTCF	CCCTC-binding factor (zinc finger protein)	0.800048	27.8092	1.05805
														ENSG00000161914	ZNF653	zinc finger protein 653	0.925664	0.806913	1.05779
														ENSG00000170265	ZNF282	zinc finger protein 282	0.891985	1.86961	1.05778
														ENSG00000196498	NCOR2	nuclear receptor co-repressor 2	0.917355	11.0992	1.05693
														ENSG00000166526	ZNF3	zinc finger protein 3	0.865937	10.9266	1.05603
														ENSG00000120798	NR2C1	nuclear receptor subfamily 2, group C, member 1	0.860106	5.62964	1.05581
														ENSG00000204604	ZNF468	zinc finger protein 468	0.877214	3.90058	1.05533
														ENSG00000162851	TFB2M	transcription factor B2, mitochondrial	0.885279	7.28927	1.05477
														ENSG00000196263	ZNF471	zinc finger protein 471	0.867179	5.90617	1.05455
														ENSG00000068323	TFE3	transcription factor binding to IGHM enhancer 3	0.887573	3.0904	1.05441
														ENSG00000063587	ZNF275	zinc finger protein 275	0.858879	4.99166	1.05413
														ENSG00000137776	SLTM	SAFB-like, transcription modulator	0.864918	46.1518	1.05412
														ENSG00000197372	ZNF675	zinc finger protein 675	0.861879	8.38355	1.0541
														ENSG00000010244	ZNF207	zinc finger protein 207	0.897768	82.9281	1.05362
														ENSG00000196700	ZNF512B	zinc finger protein 512B	0.899815	1.77467	1.05315
														ENSG00000096654	ZNF184	zinc finger protein 184	0.860486	12.4647	1.05312
														ENSG00000006576	PHTF2	putative homeodomain transcription factor 2	0.944717	1.43953	1.05258
														ENSG00000213928	IRF9	interferon regulatory factor 9	0.901488	4.01895	1.05256
														ENSG00000064995	TAF11	TAF11 RNA polymerase II, TATA box binding protein (TBP)-associated factor, 28kDa	0.881423	11.0941	1.05201
														ENSG00000175387	SMAD2	SMAD family member 2	0.814693	11.7022	1.052
														ENSG00000124459	ZNF45	zinc finger protein 45	0.871093	5.10171	1.0516
														ENSG00000196357	ZNF565	zinc finger protein 565	0.926945	1.91575	1.05151
														ENSG00000122728	TAF1L	TAF1 RNA polymerase II, TATA box binding protein (TBP)-associated factor, 210kDa-like	0.90128	1.28024	1.05149
														ENSG00000126767	ELK1	ELK1, member of ETS oncogene family	0.894088	3.3378	1.05149
														ENSG00000075407	ZNF37A	zinc finger protein 37A	0.85997	10.891	1.05137
														ENSG00000196653	ZNF502	zinc finger protein 502	0.891815	3.26307	1.05053
														ENSG00000196597	ZNF782	zinc finger protein 782	0.906238	3.56708	1.04967
														ENSG00000130818	ZNF426	zinc finger protein 426	0.879735	9.15928	1.04959
														ENSG00000198464	ZNF480	zinc finger protein 480	0.852919	8.9362	1.04879
														ENSG00000170631	ZNF16	zinc finger protein 16	0.913387	3.02675	1.04858
														ENSG00000127511	SIN3B	SIN3 homolog B, transcription regulator (yeast)	0.891055	2.63008	1.04856
														ENSG00000084093	REST	RE1-silencing transcription factor	0.857697	42.4072	1.04832
														ENSG00000182141	ZNF708	zinc finger protein 708	0.876157	7.01302	1.04822
														ENSG00000108278	ZNHIT3	zinc finger, HIT type 3	0.884021	19.0483	1.04713
														ENSG00000025293	PHF20	PHD finger protein 20	0.854297	9.04271	1.04678
														ENSG00000123268	ATF1	activating transcription factor 1	0.894363	8.35977	1.04662
														ENSG00000176371	ZSCAN2	zinc finger and SCAN domain containing 2	0.88738	6.22509	1.04597
														ENSG00000160967	CUX1	cut-like homeobox 1	0.899815	84.9014	1.04588
														ENSG00000181472	ZBTB2	zinc finger and BTB domain containing 2	0.909622	3.4589	1.04582
														ENSG00000160741	CRTC2	CREB regulated transcription coactivator 2	0.888322	8.50489	1.04546
														ENSG00000170448	NFXL1	nuclear transcription factor, X-box binding-like 1	0.890815	7.82752	1.04455
														ENSG00000130803	ZNF317	zinc finger protein 317	0.881032	5.83167	1.04447
														ENSG00000198482	ZNF808	zinc finger protein 808	0.906462	3.90284	1.04416
														ENSG00000072736	NFATC3	nuclear factor of activated T-cells, cytoplasmic, calcineurin-dependent 3	0.861095	26.5922	1.04361
														ENSG00000167232	ZNF91	zinc finger protein 91	0.857026	16.7751	1.04343
														ENSG00000185252	ZNF74	zinc finger protein 74	0.916442	2.68207	1.04287
														ENSG00000140332	TLE3	transducin-like enhancer of split 3 (E(sp1) homolog, Drosophila)	0.88804	9.67587	1.0423
														ENSG00000197162	ZNF785	zinc finger protein 688; zinc finger protein 785	0.924956	2.31483	1.04212
														ENSG00000099326	MZF1	myeloid zinc finger 1	0.943446	1.16958	1.04142
														ENSG00000117010	ZNF684	zinc finger protein 684	0.942478	1.60742	1.04107
														ENSG00000159905	ZNF234	zinc finger protein 234	0.89899	4.95236	1.041
														ENSG00000172379	ARNT2	aryl-hydrocarbon receptor nuclear translocator 2	0.8967	6.47112	1.03981
														ENSG00000186918	ZNF395	zinc finger protein 395	0.903894	12.5343	1.03976
														ENSG00000174197	MGA	MAX gene associated	0.88024	23.6213	1.03975
														ENSG00000105708	ZNF14	zinc finger protein 14	0.921783	4.35148	1.03902
														ENSG00000185122	HSF1	heat shock transcription factor 1	0.919944	4.71546	1.03832
														ENSG00000167182	SP2	Sp2 transcription factor	0.897768	8.83513	1.0382
														ENSG00000020256	ZFP64	zinc finger protein 64 homolog (mouse)	0.91724	5.84296	1.03818
														ENSG00000183309	ZNF623	zinc finger protein 623	0.884054	11.5377	1.03745
														ENSG00000182903	ZNF721	zinc finger protein 721	0.885279	9.53043	1.0368
														ENSG00000172667	ZMAT3	zinc finger, matrin type 3	0.919265	1.83374	1.03657
														ENSG00000018607	ZNF221	zinc finger protein 221	0.943661	2.58642	1.03628
														ENSG00000166886	NAB2	NGFI-A binding protein 2 (EGR1 binding protein 2)	0.938637	3.26366	1.03607
														ENSG00000160113	NR2F6	nuclear receptor subfamily 2, group F, member 6	0.927252	7.60528	1.03524
														ENSG00000173757	STAT5B	signal transducer and activator of transcription 5B	0.88773	9.31239	1.03504
														ENSG00000180233	ZNRF2	zinc and ring finger 2	0.943658	1.94687	1.03451
														ENSG00000198517	MAFK	v-maf musculoaponeurotic fibrosarcoma oncogene homolog K (avian)	0.956645	0.545833	1.03434
														ENSG00000178665	ZNF713	zinc finger protein 713	0.928243	6.40515	1.03429
														ENSG00000196652	ZKSCAN5	zinc finger with KRAB and SCAN domains 5	0.914585	4.94436	1.03379
														ENSG00000197013	ZNF429	zinc finger protein 429	0.931457	5.89546	1.03362
														ENSG00000125846	ZNF133	zinc finger protein 133	0.937014	3.91743	1.03354
														ENSG00000167981	ZNF597	zinc finger protein 597	0.951278	2.31431	1.03321
														ENSG00000198153	ZNF506	zinc finger protein 506	0.914585	7.57082	1.03228
														ENSG00000152439	ZNF773	zinc finger protein 773	0.949821	1.99649	1.03227
														ENSG00000197714	ZNF460	zinc finger protein 460	0.906006	19.0596	1.03216
														ENSG00000171161	ZNF672	zinc finger protein 672; hypothetical LOC100130262	0.942478	2.67214	1.03117
														ENSG00000116809	ZBTB17	zinc finger and BTB domain containing 17	0.950559	2.21101	1.03057
														ENSG00000171425	ZNF581	zinc finger protein 581	0.952159	4.04086	1.03031
														ENSG00000120837	NFYB	nuclear transcription factor Y, beta	0.927735	5.74211	1.03025
														ENSG00000185219	ZNF445	zinc finger protein 445	0.895681	9.89278	1.0302
														ENSG00000165030	NFIL3	nuclear factor, interleukin 3 regulated	0.949526	17.3646	1.02866
														ENSG00000197343	ZNF655	zinc finger protein 655	0.961269	17.1794	1.02864
														ENSG00000198393	ZNF26	zinc finger protein 26	0.952254	3.07472	1.02851
														ENSG00000220949	ZNF564	zinc finger protein 564	0.943658	4.26963	1.02831
														ENSG00000151612	ZNF827	zinc finger protein 827	0.917442	16.1171	1.0283
														ENSG00000138293	NCOA4	nuclear receptor coactivator 4	0.957429	5.79509	1.02829
														ENSG00000172006	ZNF554	zinc finger protein 554	0.954253	1.80804	1.0282
														ENSG00000105132	ZNF550	zinc finger protein 550	0.94736	4.80439	1.02793
														ENSG00000126456	IRF3	interferon regulatory factor 3	0.950379	5.08505	1.02719
														ENSG00000006194	ZNF263	zinc finger protein 263	0.947206	3.55597	1.02708
														ENSG00000180479	ZNF571	zinc finger protein 571	0.958035	1.84845	1.02684
														ENSG00000197279	ZNF165	zinc finger protein 165	0.967293	2.04059	1.02675
														ENSG00000090612	ZNF10	zinc finger protein 10	0.942478	3.16849	1.02657
														ENSG00000170802	FOXN2	forkhead box N2	0.94736	2.8873	1.02521
														ENSG00000176222	ZNF404	zinc finger protein 404	0.966769	1.02835	1.02502
														ENSG00000167383	ZNF229	zinc finger protein 229	0.946083	3.03457	1.02455
														ENSG00000170322	NFRKB	nuclear factor related to kappaB binding protein	0.929716	7.74849	1.02396
														ENSG00000163877	SNIP1	Smad nuclear interacting protein 1	0.947943	3.46793	1.02395
														ENSG00000178163	ZNF518B	zinc finger protein 518B	0.933708	12.214	1.02241
														ENSG00000124226	RNF114	ring finger protein 114	0.943658	15.0807	1.02206
														ENSG00000087903	RFX2	regulatory factor X, 2 (influences HLA class II expression)	0.960612	1.87108	1.02183
														ENSG00000109320	NFKB1	nuclear factor of kappa light polypeptide gene enhancer in B-cells 1	0.942478	8.96798	1.02067
														ENSG00000145147	SLIT2	slit homolog 2 (Drosophila)	0.947206	12.6247	1.02043
														ENSG00000186187	ZNRF1	zinc and ring finger 1	0.954652	4.96868	1.02029
														ENSG00000121406	ZNF549	zinc finger protein 549	0.956342	3.29696	1.02
														ENSG00000186376	ZNF75D	zinc finger protein 75D	0.959554	4.48712	1.01975
														ENSG00000221869	CEBPD	CCAAT/enhancer binding protein (C/EBP), delta	0.972234	4.35988	1.0188
														ENSG00000196646	ZNF136	zinc finger protein 136	0.95662	5.46212	1.0182
														ENSG00000175787	ZNF169	zinc finger protein 169	0.974162	1.00245	1.0181
														ENSG00000077809	GTF2I	general transcription factor II, i; general transcription factor II, i, pseudogene	0.950382	87.2731	1.01807
														ENSG00000167554	ZNF610	zinc finger protein 610	0.963334	6.23921	1.01801
														ENSG00000198182	ZNF607	zinc finger protein 607	0.961716	4.02539	1.01795
														ENSG00000186660	ZFP91	zinc finger protein 91 homolog (mouse); ZFP91-CNTF readthrough transcript; ciliary neurotrophic factor	0.945519	21.0832	1.01699
														ENSG00000105136	ZNF419	zinc finger protein 419	0.966646	3.73163	1.01661
														ENSG00000204611	ZNF616	zinc finger protein 616	0.959058	6.08894	1.01659
														ENSG00000126746	ZNF384	zinc finger protein 384	0.948632	25.8269	1.01658
														ENSG00000109118	PHF12	PHD finger protein 12	0.965822	8.19867	1.01646
														ENSG00000018869	ZNF582	zinc finger protein 582	0.980215	1.11297	1.01606
														ENSG00000163795	ZNF513	zinc finger protein 513	0.9791	1.34771	1.01555
														ENSG00000159917	ZNF235	zinc finger protein 235	0.975558	1.77928	1.0144
														ENSG00000164011	ZNF691	zinc finger protein 691	0.967986	7.05884	1.01426
														ENSG00000121864	ZNF639	zinc finger protein 639	0.958091	13.3254	1.01417
														ENSG00000143178	TBX19	T-box 19	0.982534	0.852935	1.01345
														ENSG00000161021	MAML1	mastermind-like 1 (Drosophila)	0.960196	14.848	1.01254
														ENSG00000182952	HMGN4	high mobility group nucleosomal binding domain 4	0.966267	15.0094	1.0123
														ENSG00000188785	ZNF548	zinc finger protein 548	0.970992	5.97206	1.01099
														ENSG00000213015	ZNF580	zinc finger protein 580	0.983085	5.65909	1.01071
														ENSG00000206289	RXRB	retinoid X receptor, beta	0.975418	9.99441	1.01015
														ENSG00000204231	RXRB	retinoid X receptor, beta	0.975418	9.99441	1.01015
														ENSG00000206218	RXRB	retinoid X receptor, beta	0.975418	9.99441	1.01015
														ENSG00000196724	ZNF418	zinc finger protein 418	0.977544	4.16798	1.00987
														ENSG00000105732	ZNF574	zinc finger protein 574	0.977102	5.47543	1.00977
														ENSG00000065717	TLE2	transducin-like enhancer of split 2 (E(sp1) homolog, Drosophila)	0.975329	13.261	1.00959
														ENSG00000196110	ZNF699	zinc finger protein 699	0.989253	1.13289	1.00823
														ENSG00000181638	ZFP41	zinc finger protein 41 homolog (mouse)	0.986689	1.04971	1.0081
														ENSG00000121903	ZSCAN20	zinc finger and SCAN domain containing 20	0.986594	1.34382	1.00799
														ENSG00000013561	RNF14	ring finger protein 14	0.984664	4.07995	1.00716
														ENSG00000169375	SIN3A	SIN3 homolog A, transcription regulator (yeast)	0.978635	29.4389	1.00691
														ENSG00000148308	GTF3C5	general transcription factor IIIC, polypeptide 5, 63kDa	0.981626	15.1946	1.00653
														ENSG00000197951	ZNF71	zinc finger protein 71	0.98532	5.31494	1.00642
														ENSG00000197780	TAF13	TAF13 RNA polymerase II, TATA box binding protein (TBP)-associated factor, 18kDa	0.990119	6.75449	1.00599
														ENSG00000173545	ZNF622	zinc finger protein 622	0.988537	5.34073	1.00567
														ENSG00000101493	ZNF516	zinc finger protein 516	0.982534	14.1748	1.00558
														ENSG00000166261	ZNF202	zinc finger protein 202	0.986357	6.78361	1.0054
														ENSG00000171469	ZNF561	zinc finger protein 561; zinc finger protein 812	0.986357	12.9766	1.00484
														ENSG00000181894	ZNF329	zinc finger protein 329	0.98988	4.50203	1.0043
														ENSG00000066422	ZBTB11	zinc finger and BTB domain containing 11	0.986941	7.05527	1.00423
														ENSG00000164048	ZNF589	zinc finger protein 589	0.992071	4.23329	1.0038
														ENSG00000189042	ZNF567	zinc finger protein 567	0.993893	3.68104	1.00297
														ENSG00000167562	ZNF701	zinc finger protein 701	0.993844	3.28463	1.00269
														ENSG00000196812	ZSCAN16	zinc finger and SCAN domain containing 16	0.99523	8.21198	1.00244
														ENSG00000183495	EP400	E1A binding protein p400	0.992195	9.69454	1.00224
														ENSG00000177485	ZBTB33	zinc finger and BTB domain containing 33	0.993328	9.30757	1.00215
														ENSG00000149050	ZNF214	zinc finger protein 214	0.996202	3.88205	1.00157
														ENSG00000130024	PHF10	PHD finger protein 10	0.997623	15.1172	1.00149
														ENSG00000103495	MAZ	MYC-associated zinc finger protein (purine-binding transcription factor)	0.99862	5.03769	1.00081
														ENSG00000198046	ZNF667	zinc finger protein 667	0.998834	3.47994	1.00049
														ENSG00000137504	CREBZF	CREB/ATF bZIP transcription factor	0.99862	13.1372	1.00042
