# Supplementary figures and images for: Human embryonic lung epithelial tips are multipotent progenitors that can be expanded in vitro as long-term self-renewing organoids
Source: eLife journal article supplement (doi:10.7554/elife.26575), 2017-06-30

Nikolic et al. Figure 1, Supplement 1

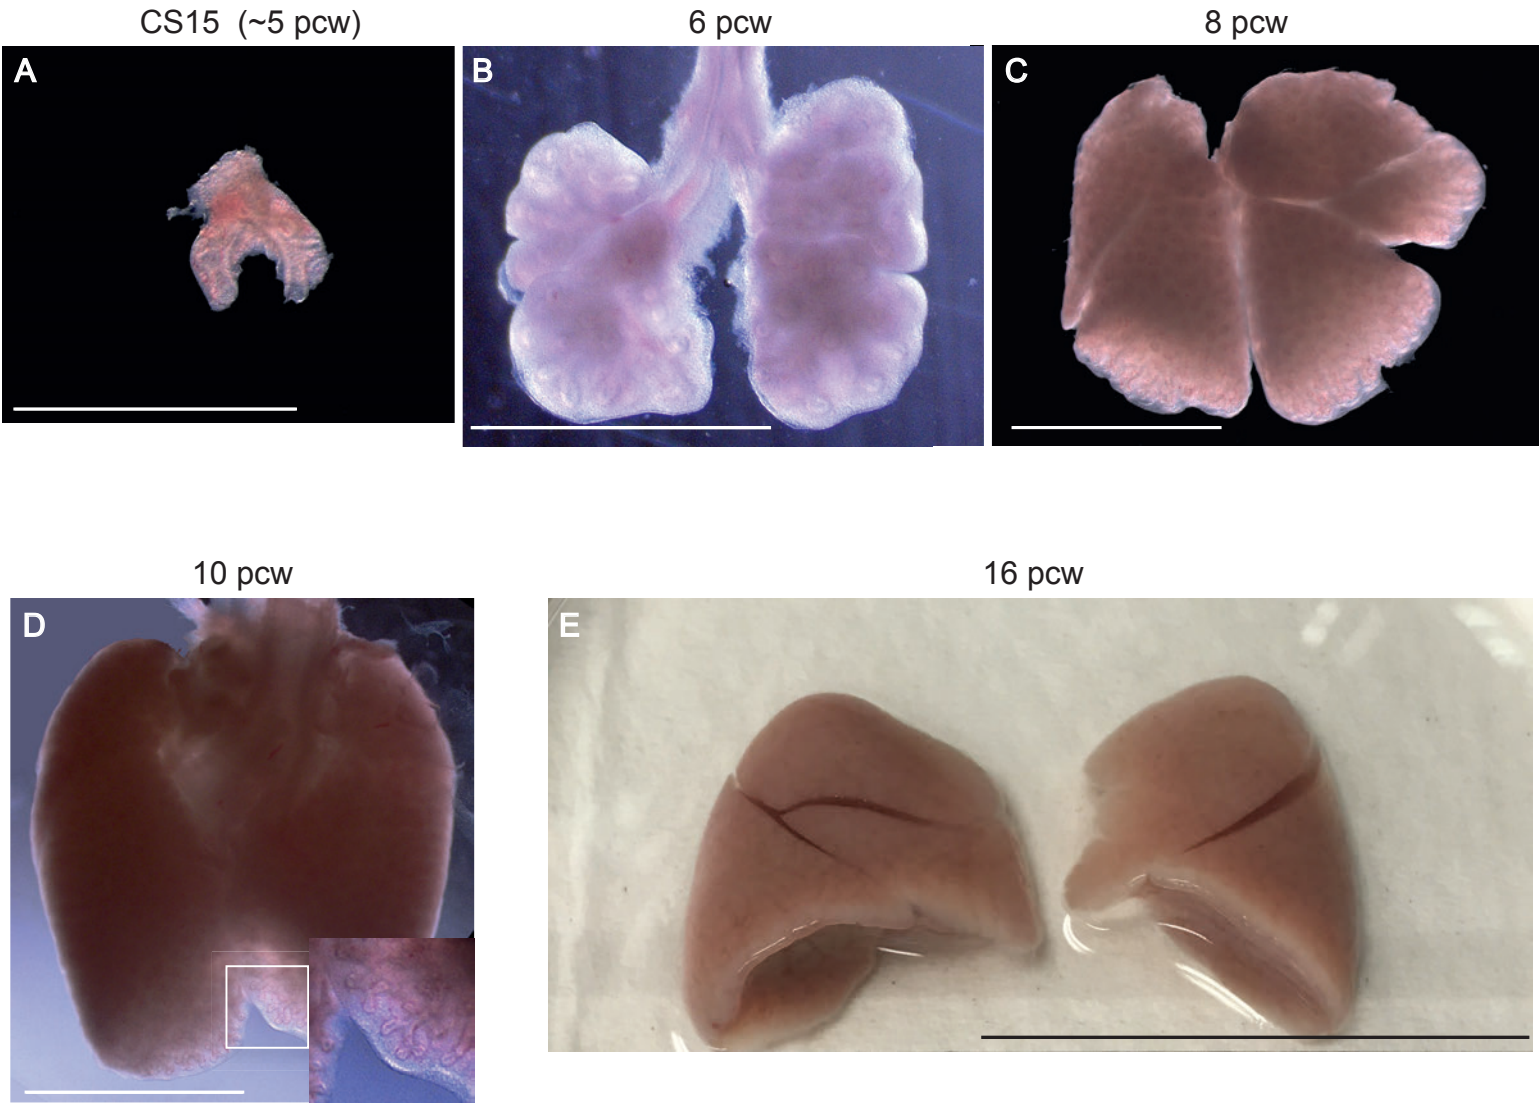

Supplement: supp [file elife_poa_e26575_Figure_1_figure_supplement_1.pdf › elife_poa_e26575_Figure_1_figure_supplement_1.pdf]

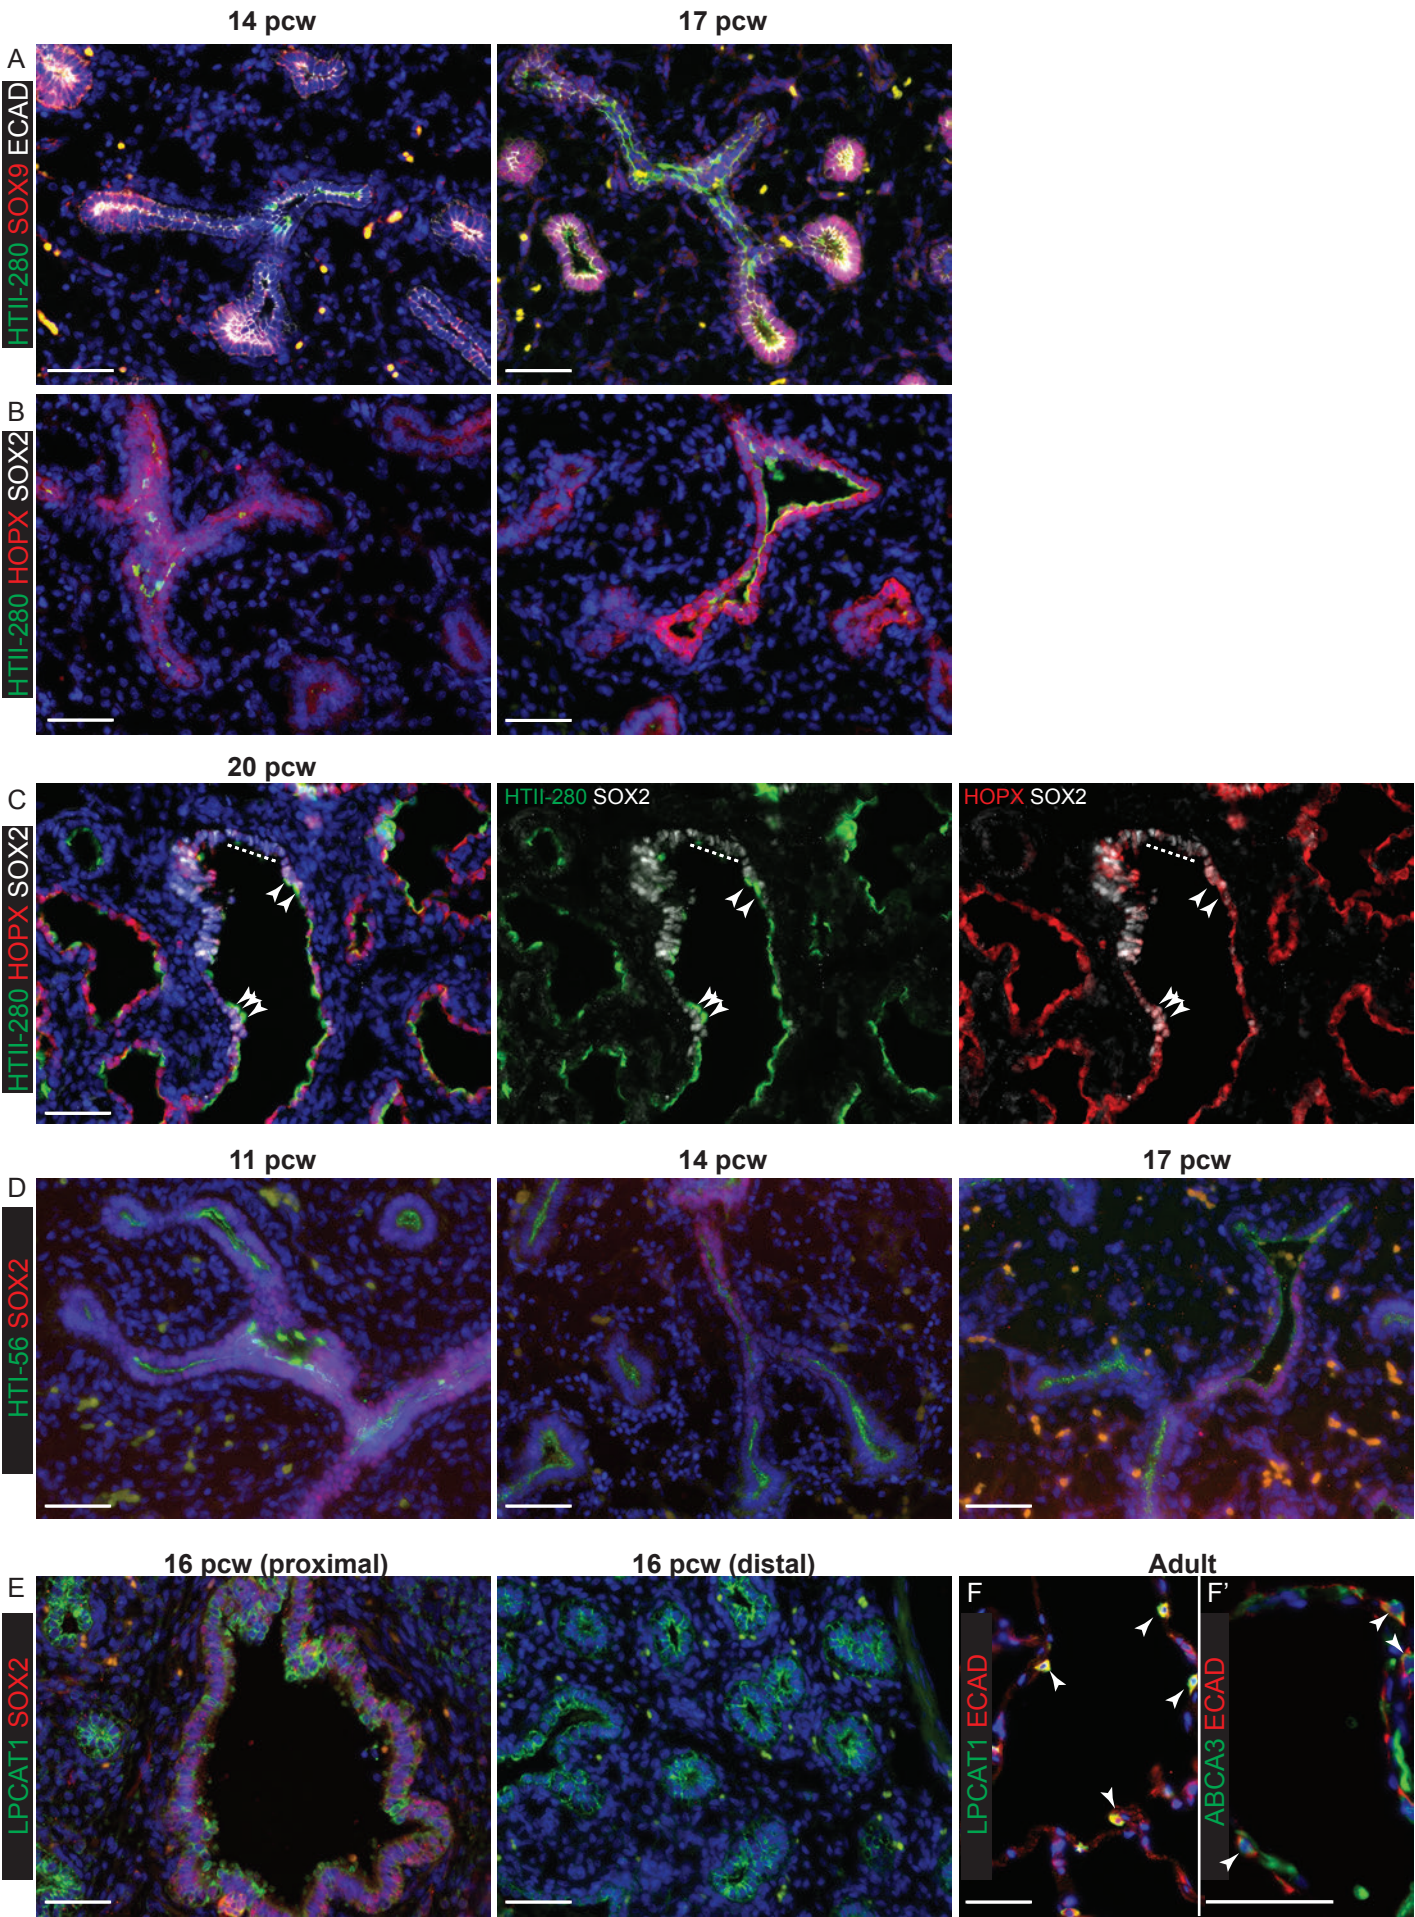

Supplement: supp [file elife_poa_e26575_Figure_1_figure_supplement_2.pdf › elife_poa_e26575_Figure_1_figure_supplement_2.pdf]

Nikolic et al. Figure 1, Supplement 3.

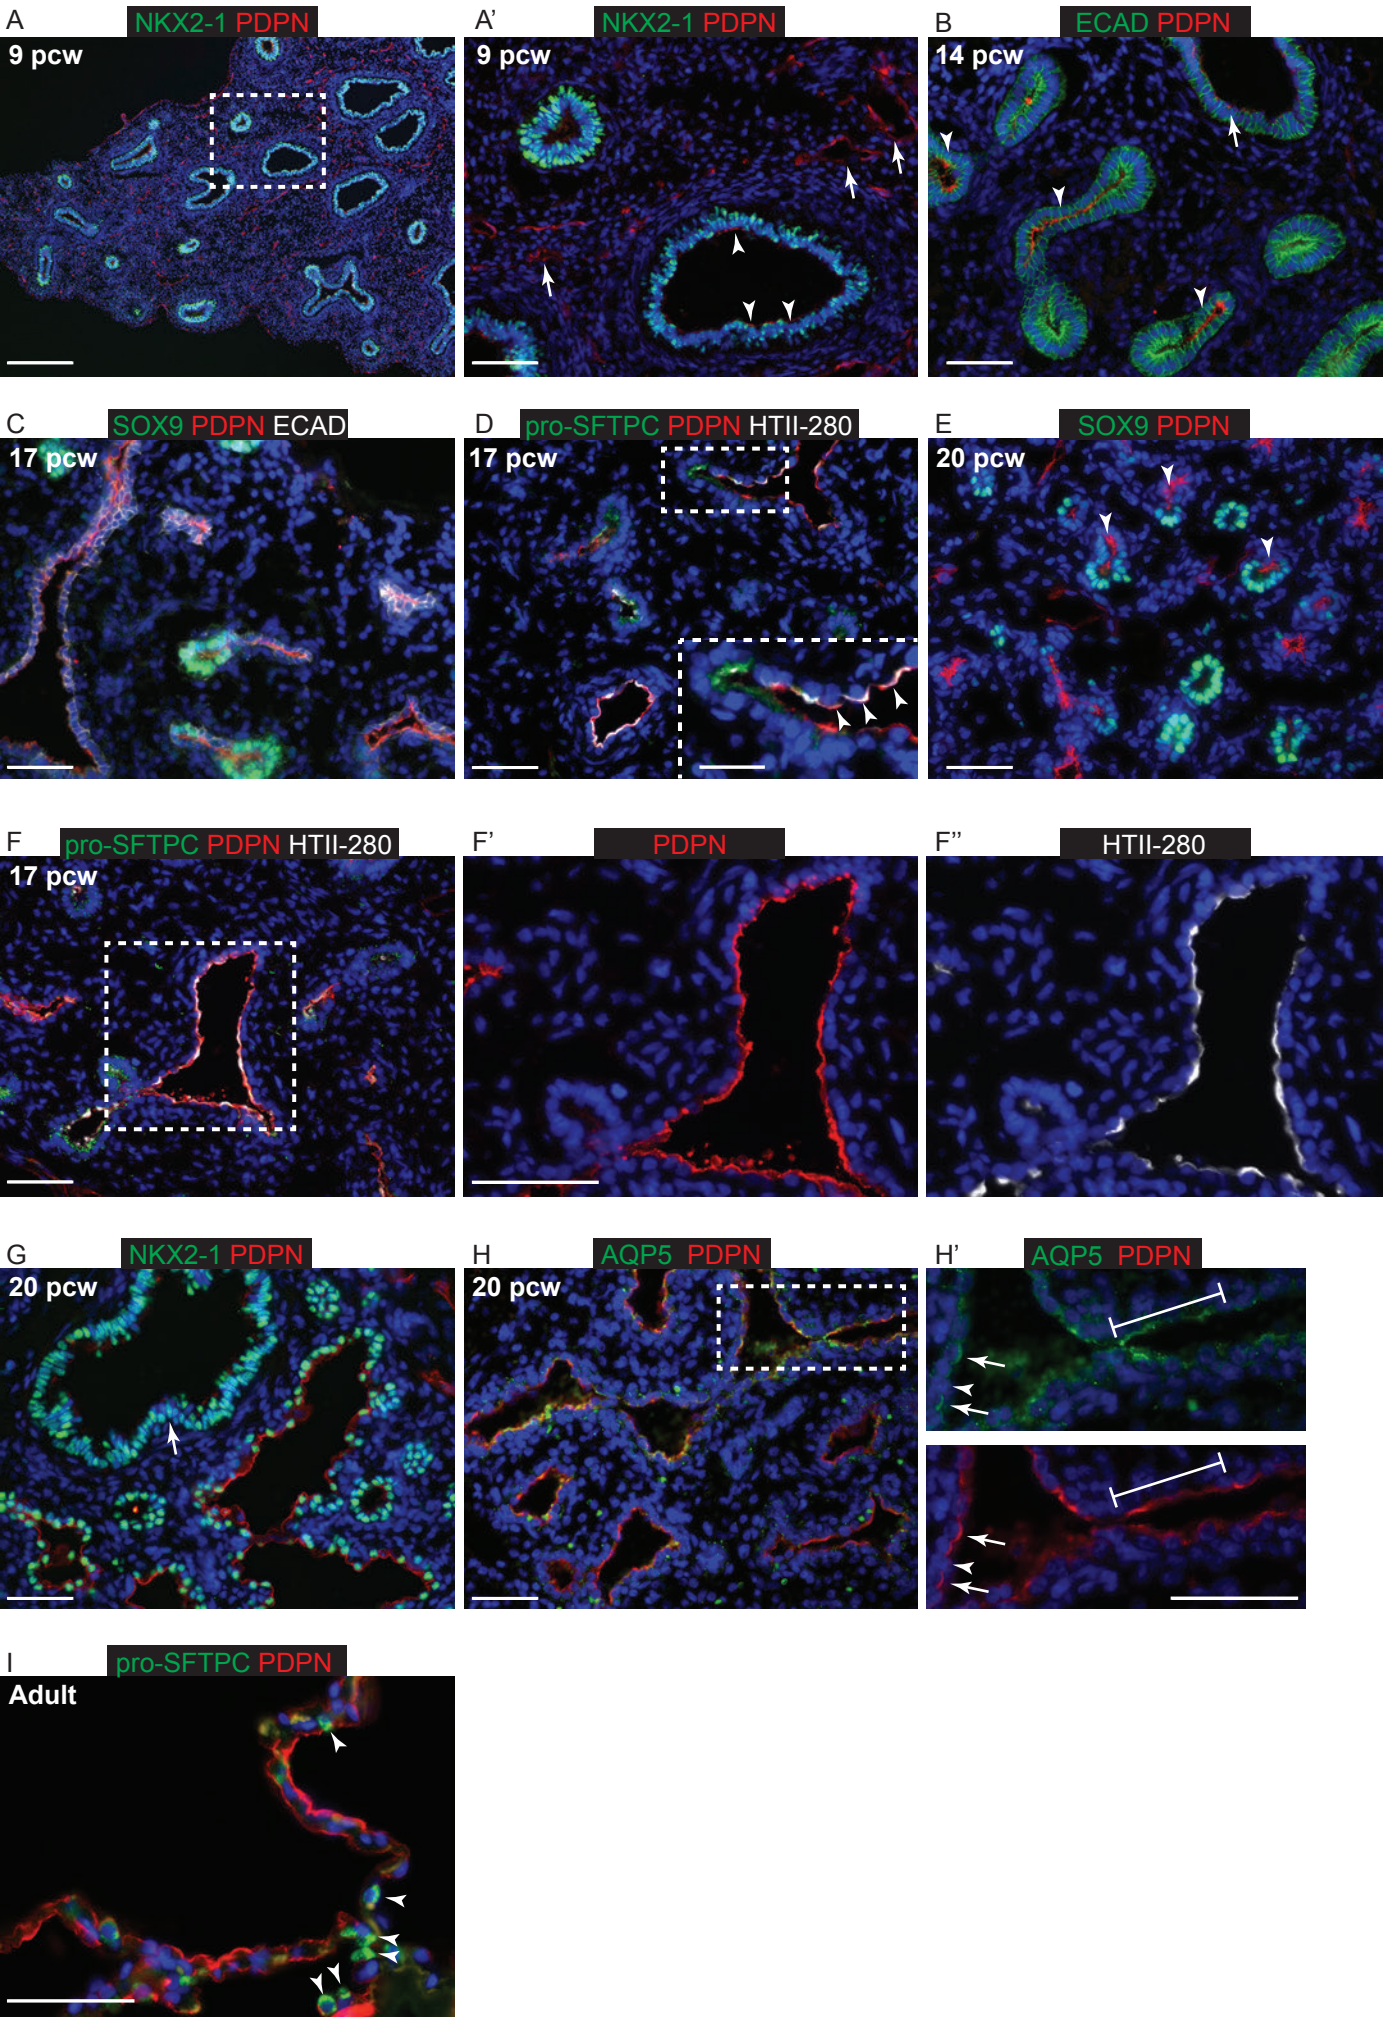

Supplement: supp [file elife_poa_e26575_Figure_1_figure_supplement_3.pdf › elife_poa_e26575_Figure_1_figure_supplement_3.pdf]

Nikolic et al. Figure 1, Supplement 4.

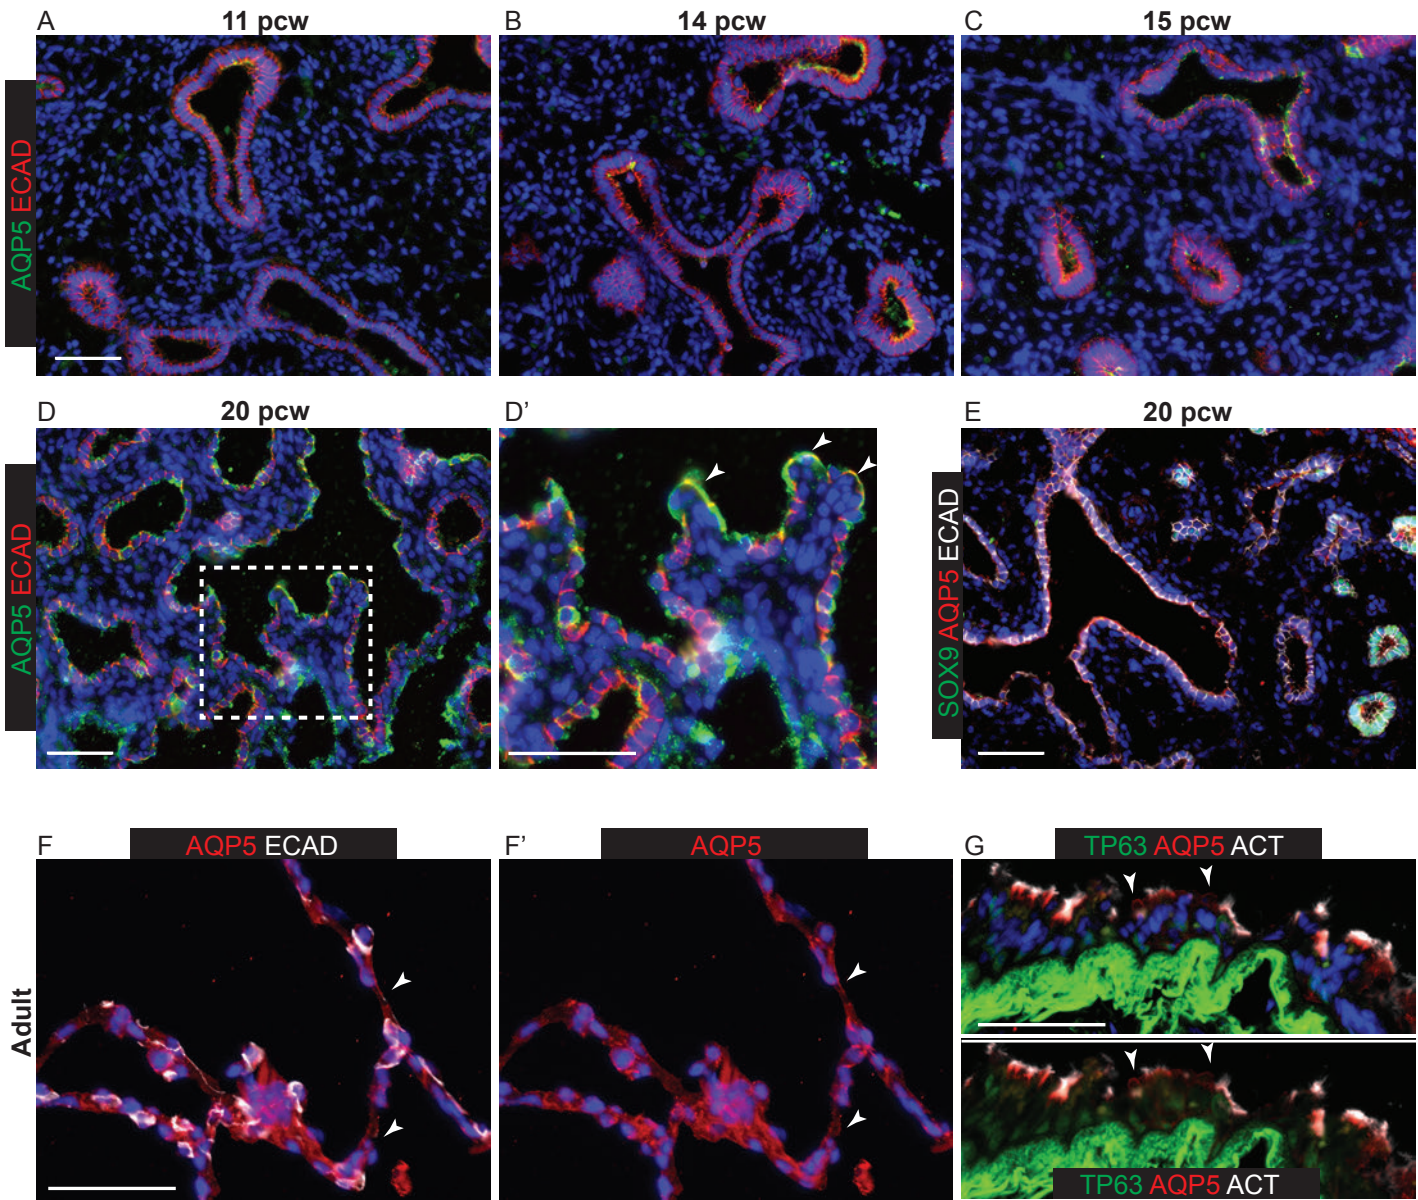

Supplement: supp [file elife_poa_e26575_Figure_1_figure_supplement_4.pdf › elife_poa_e26575_Figure_1_figure_supplement_4.pdf]

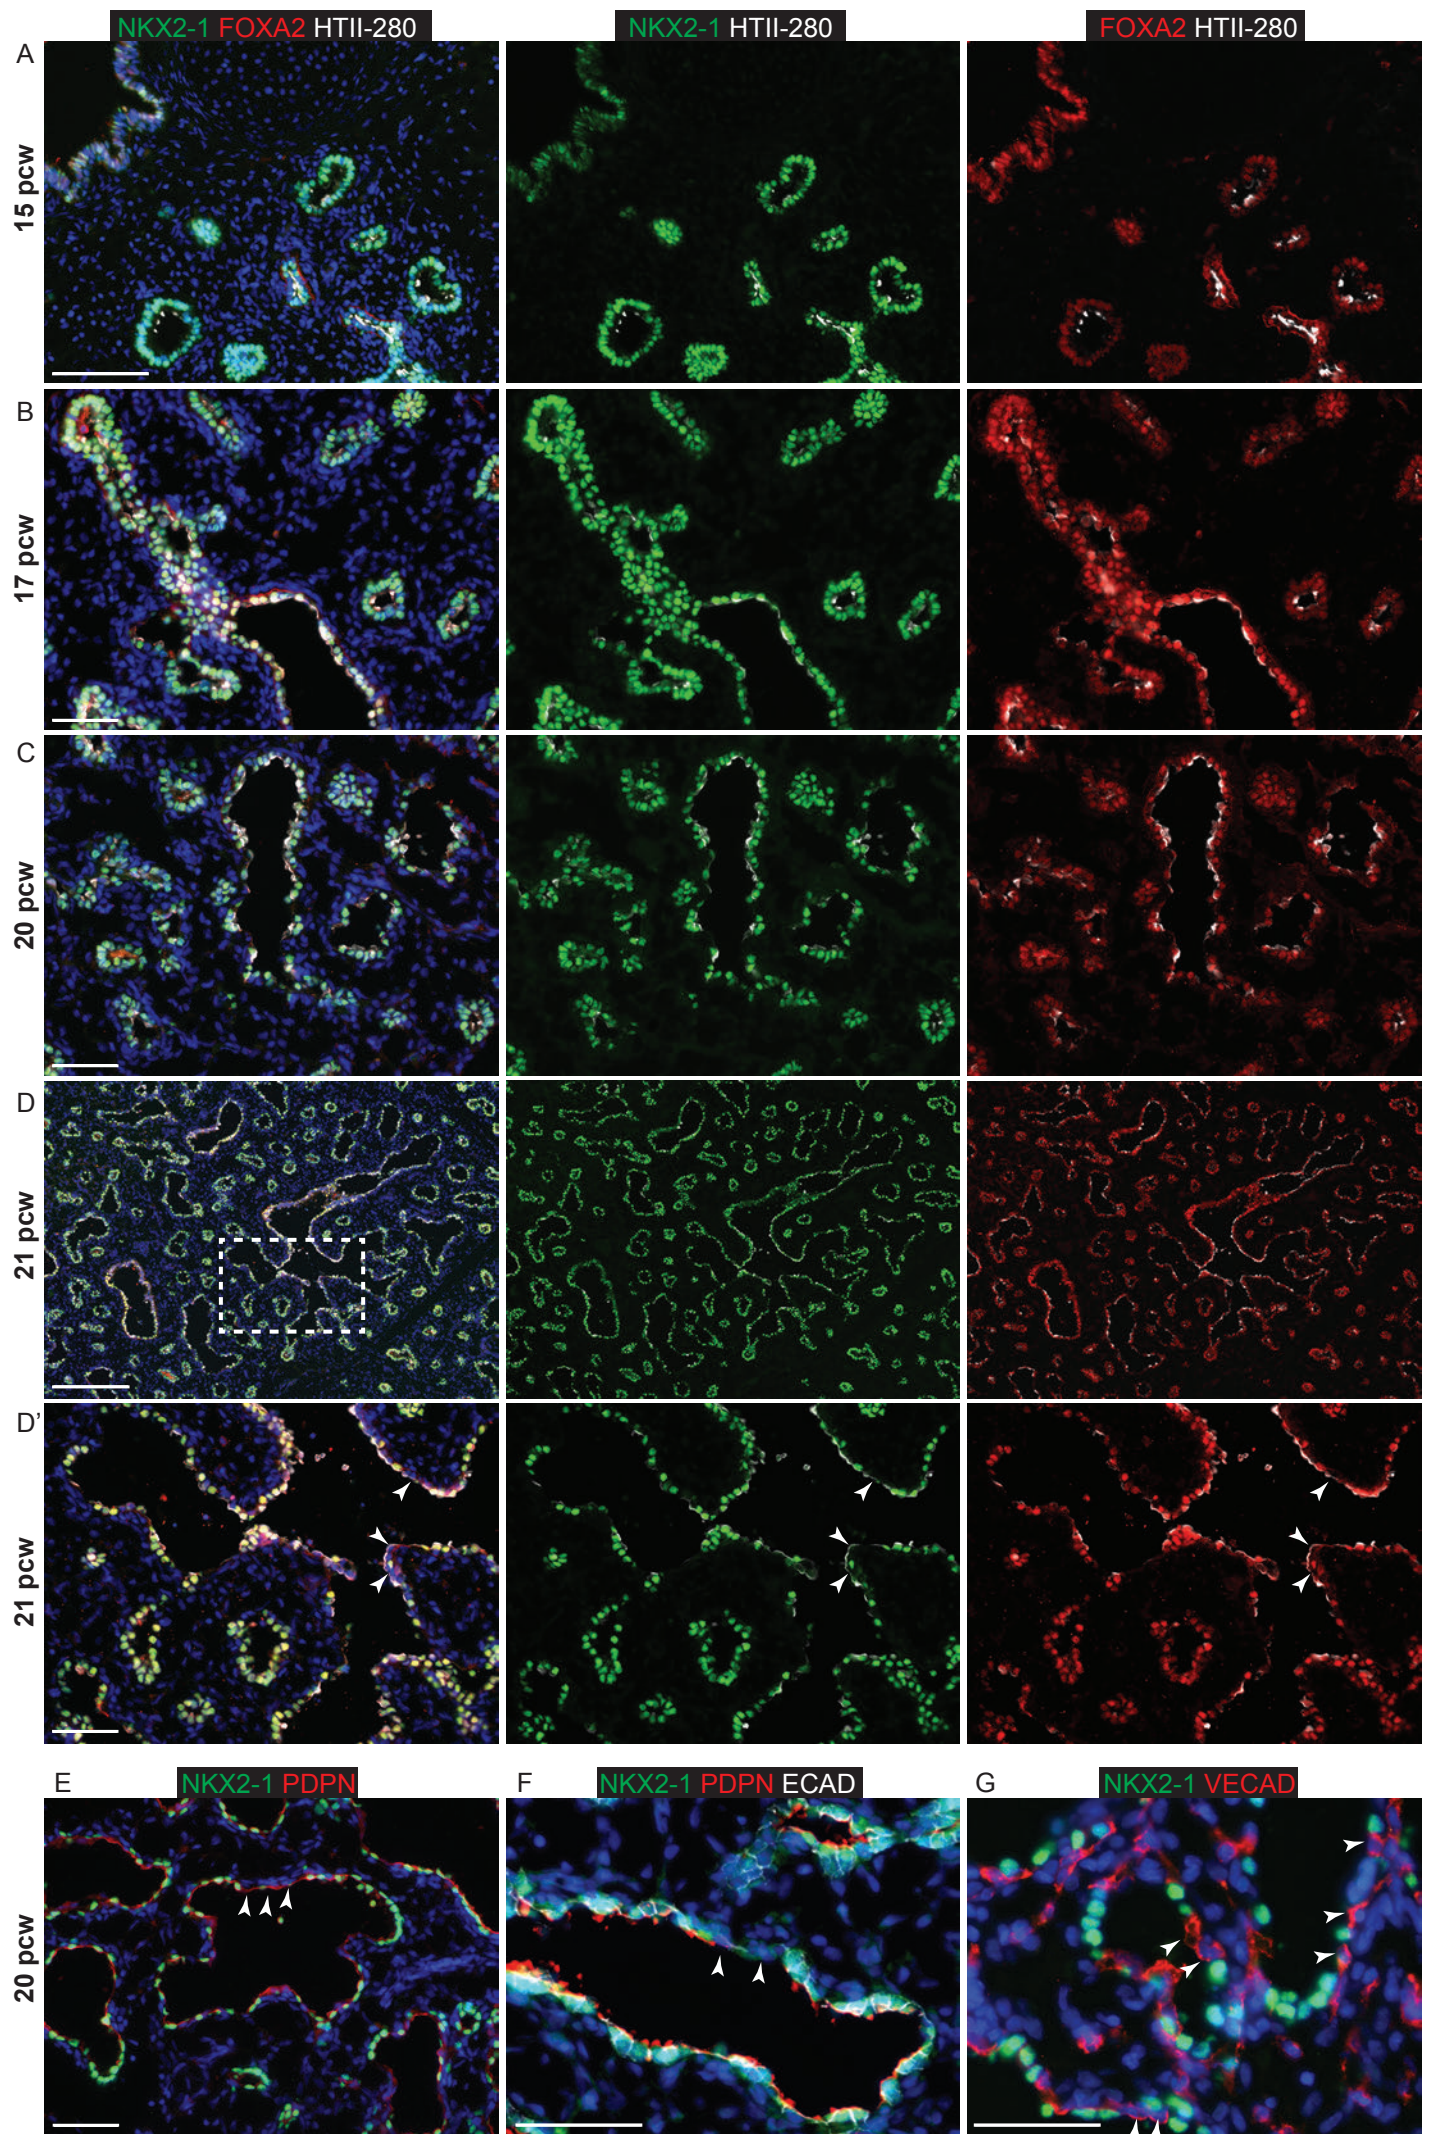

Supplement: supp [file elife_poa_e26575_Figure_1_figure_supplement_5.pdf › elife_poa_e26575_Figure_1_figure_supplement_5.pdf]

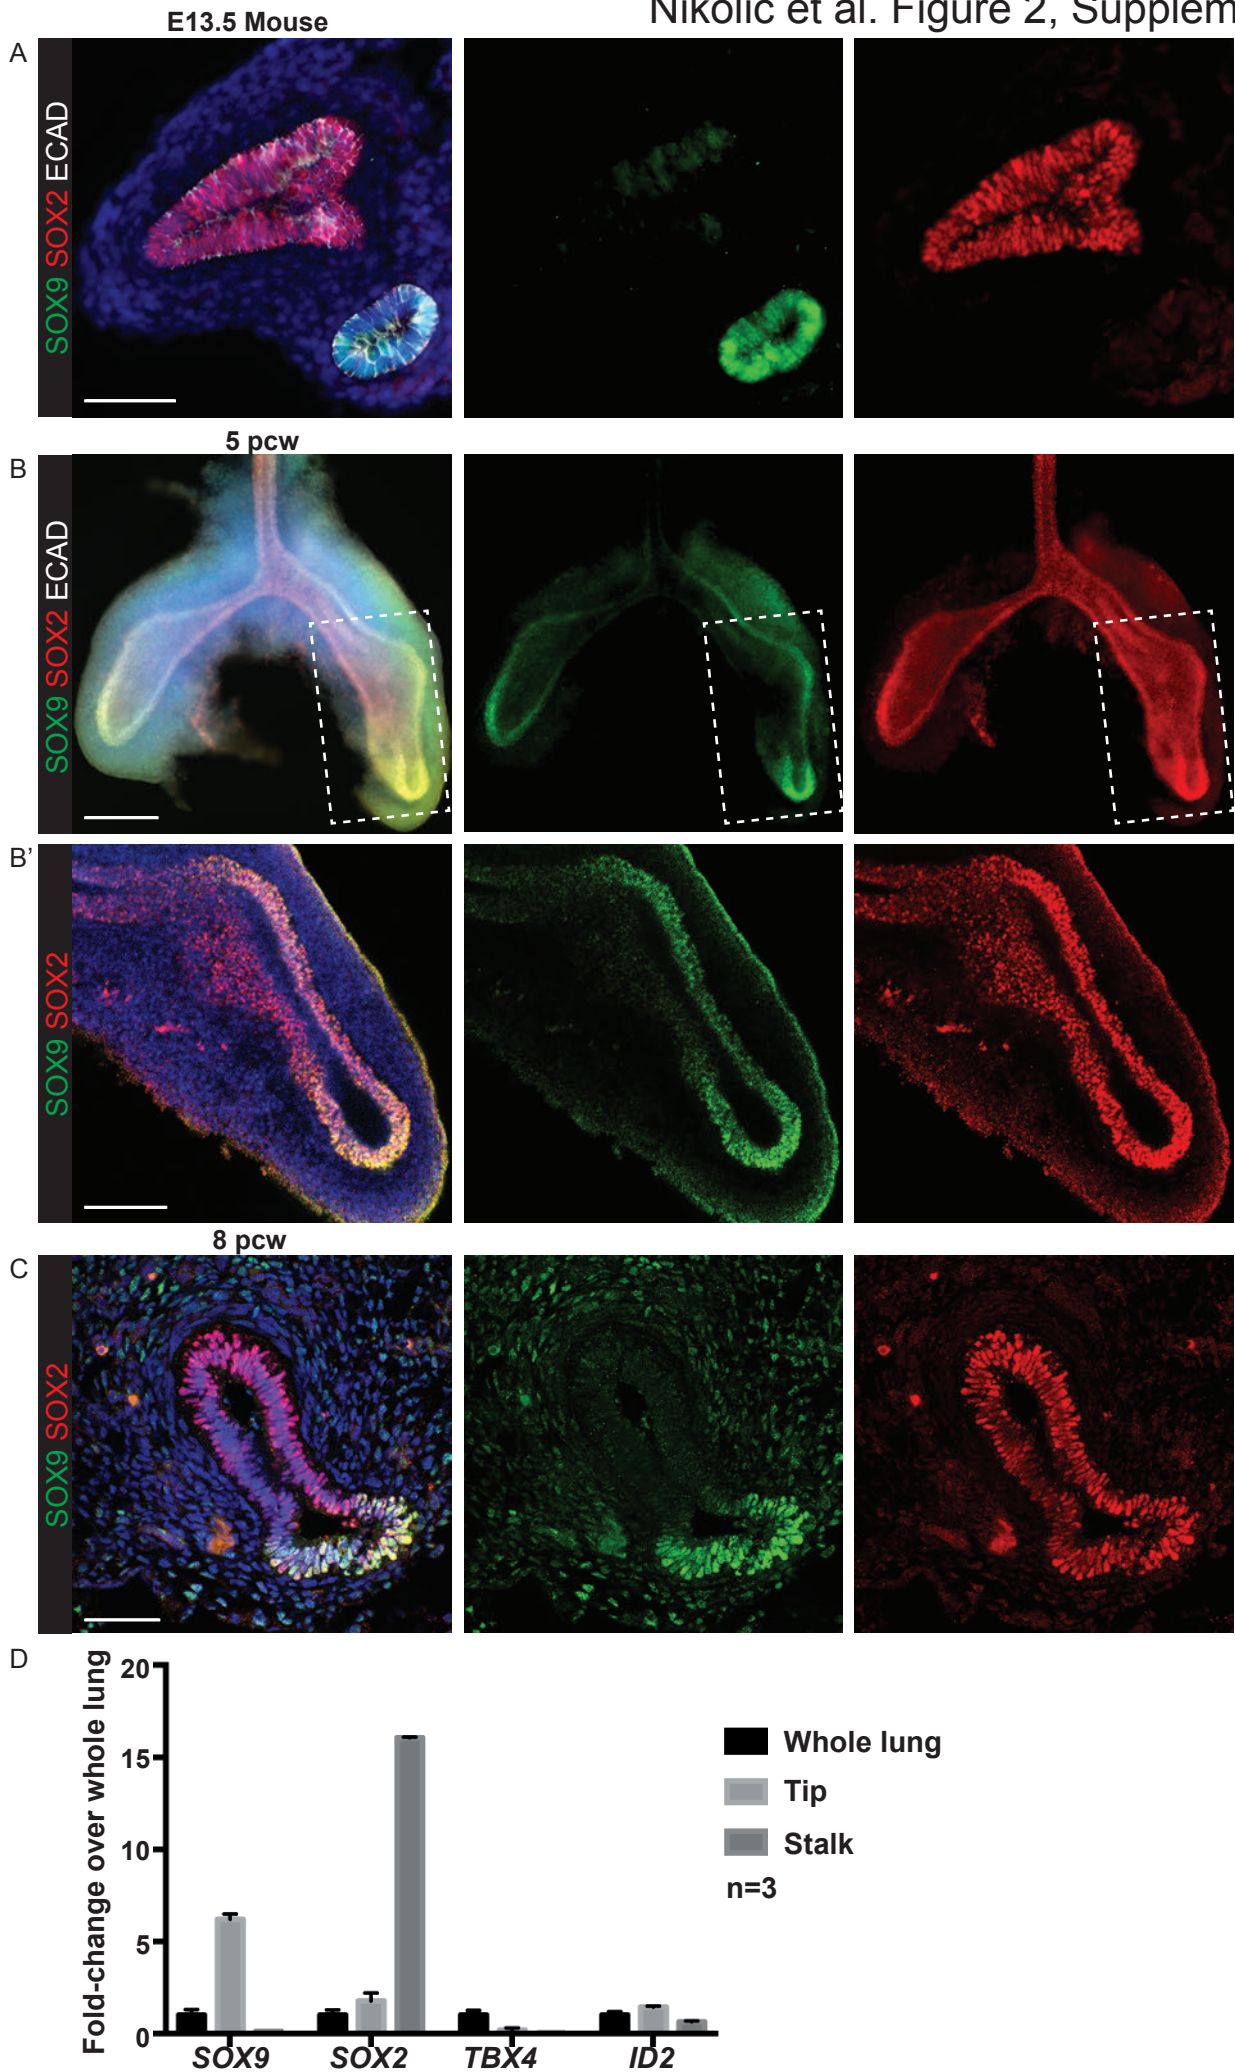

Supplement: supp [file elife_poa_e26575_Figure_2_figure_supplement_1.pdf › elife_poa_e26575_Figure_2_figure_supplement_1.pdf]

Nikolic et al. Figure 2, Supplement 2.

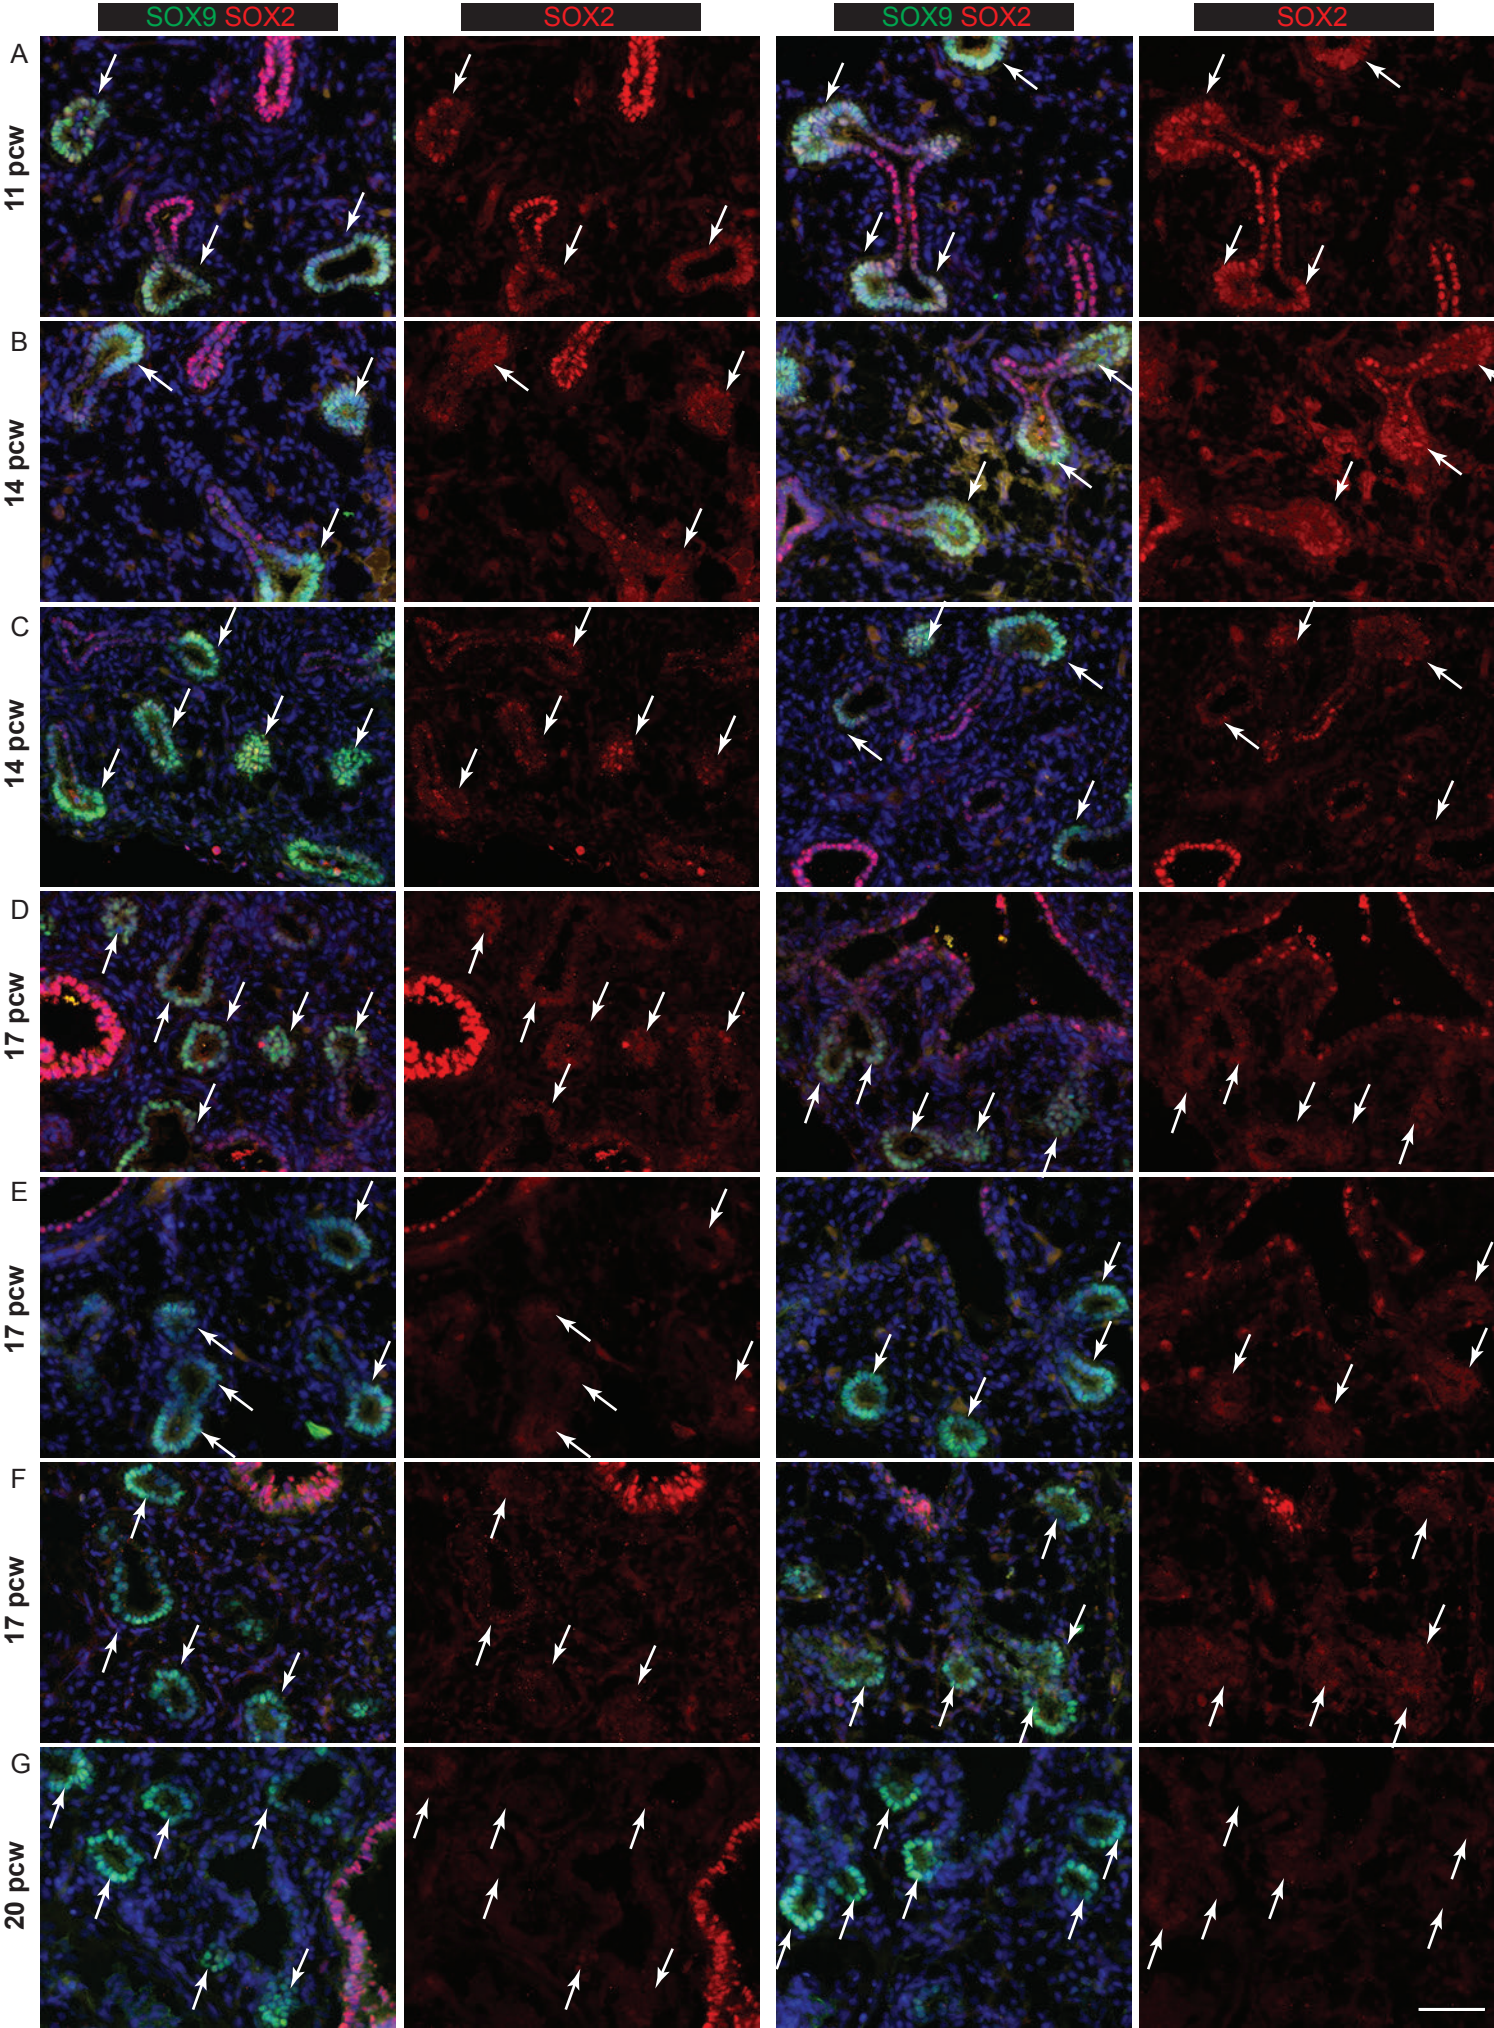

Supplement: supp [file elife_poa_e26575_Figure_2_figure_supplement_2.pdf › elife_poa_e26575_Figure_2_figure_supplement_2.pdf]

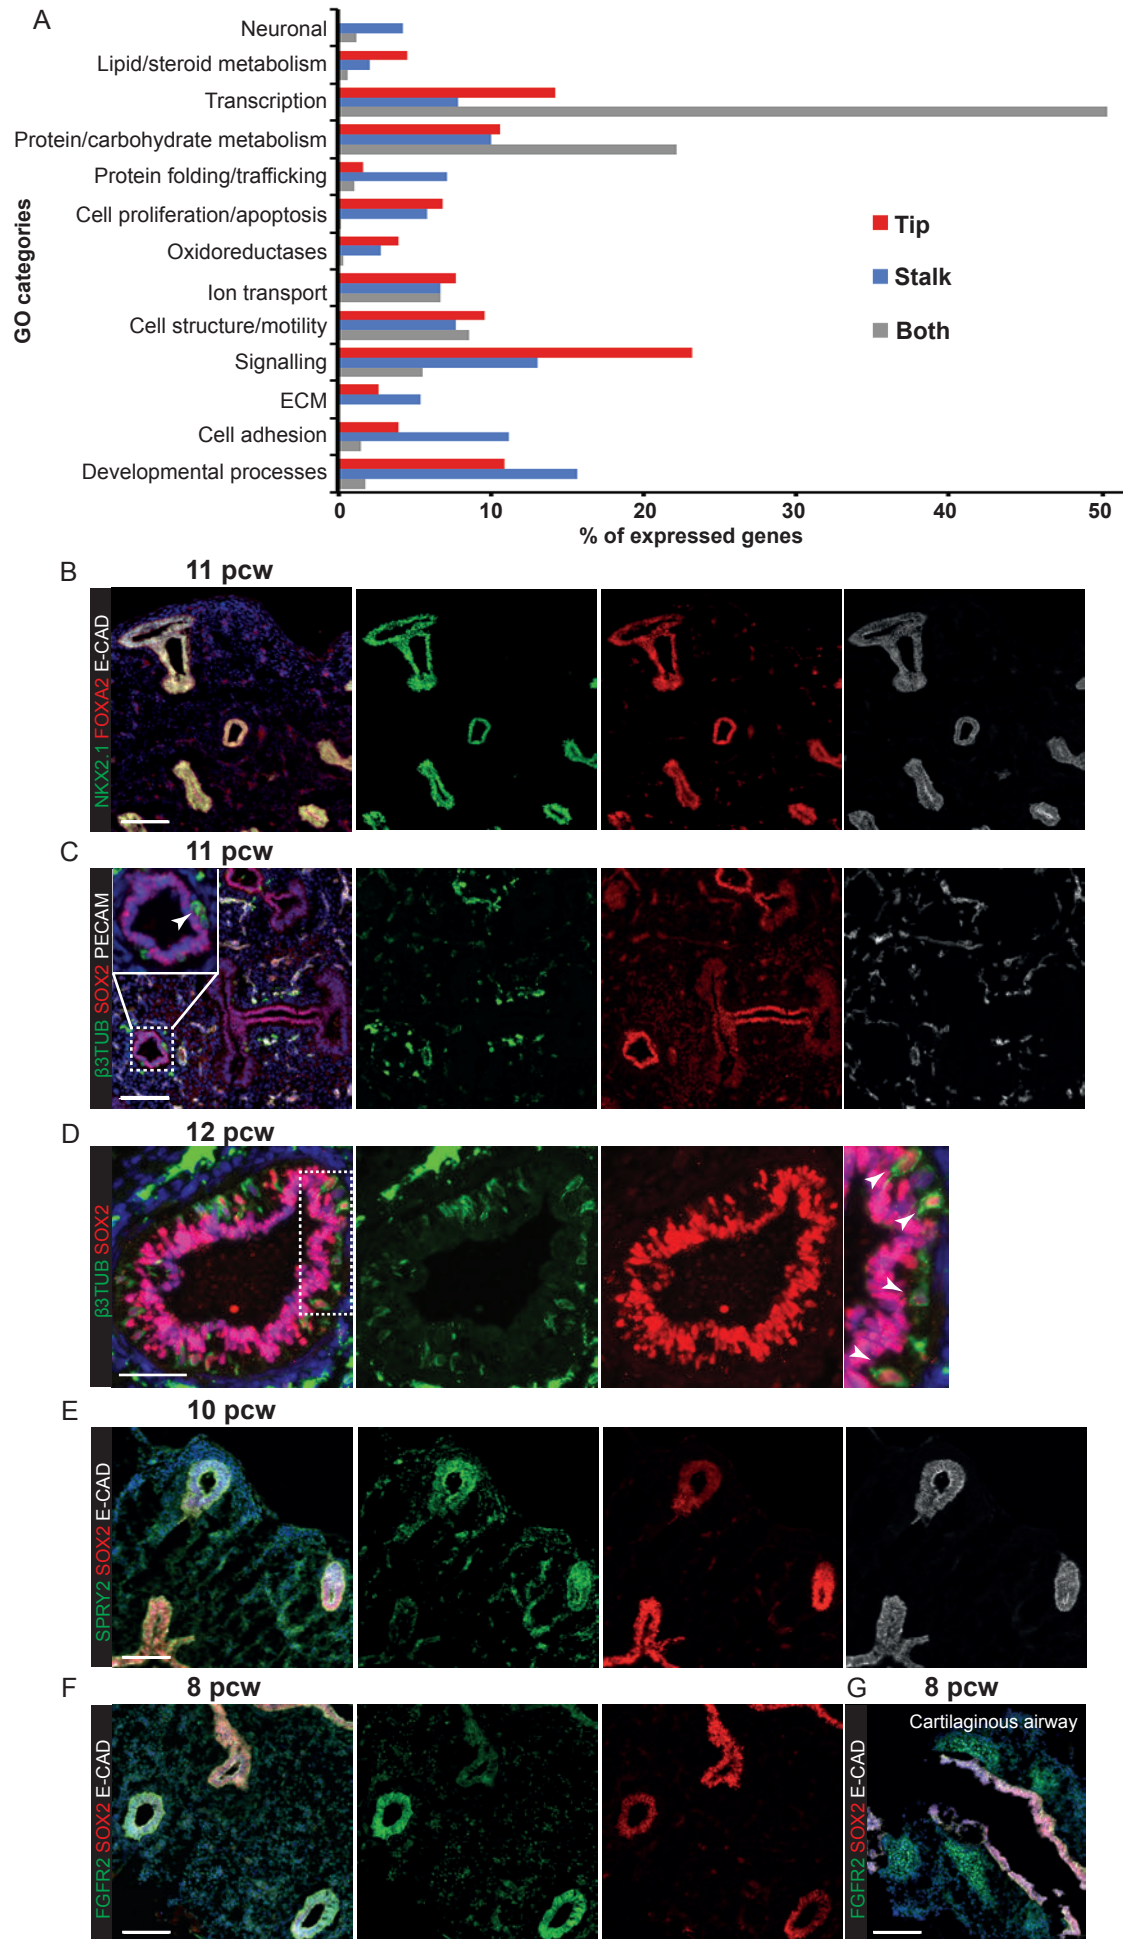

Supplement: supp [file elife_poa_e26575_Figure_2_figure_supplement_3.pdf › elife_poa_e26575_Figure_2_figure_supplement_3.pdf]

Nikolic et al. Figure 2, Supplement 4.

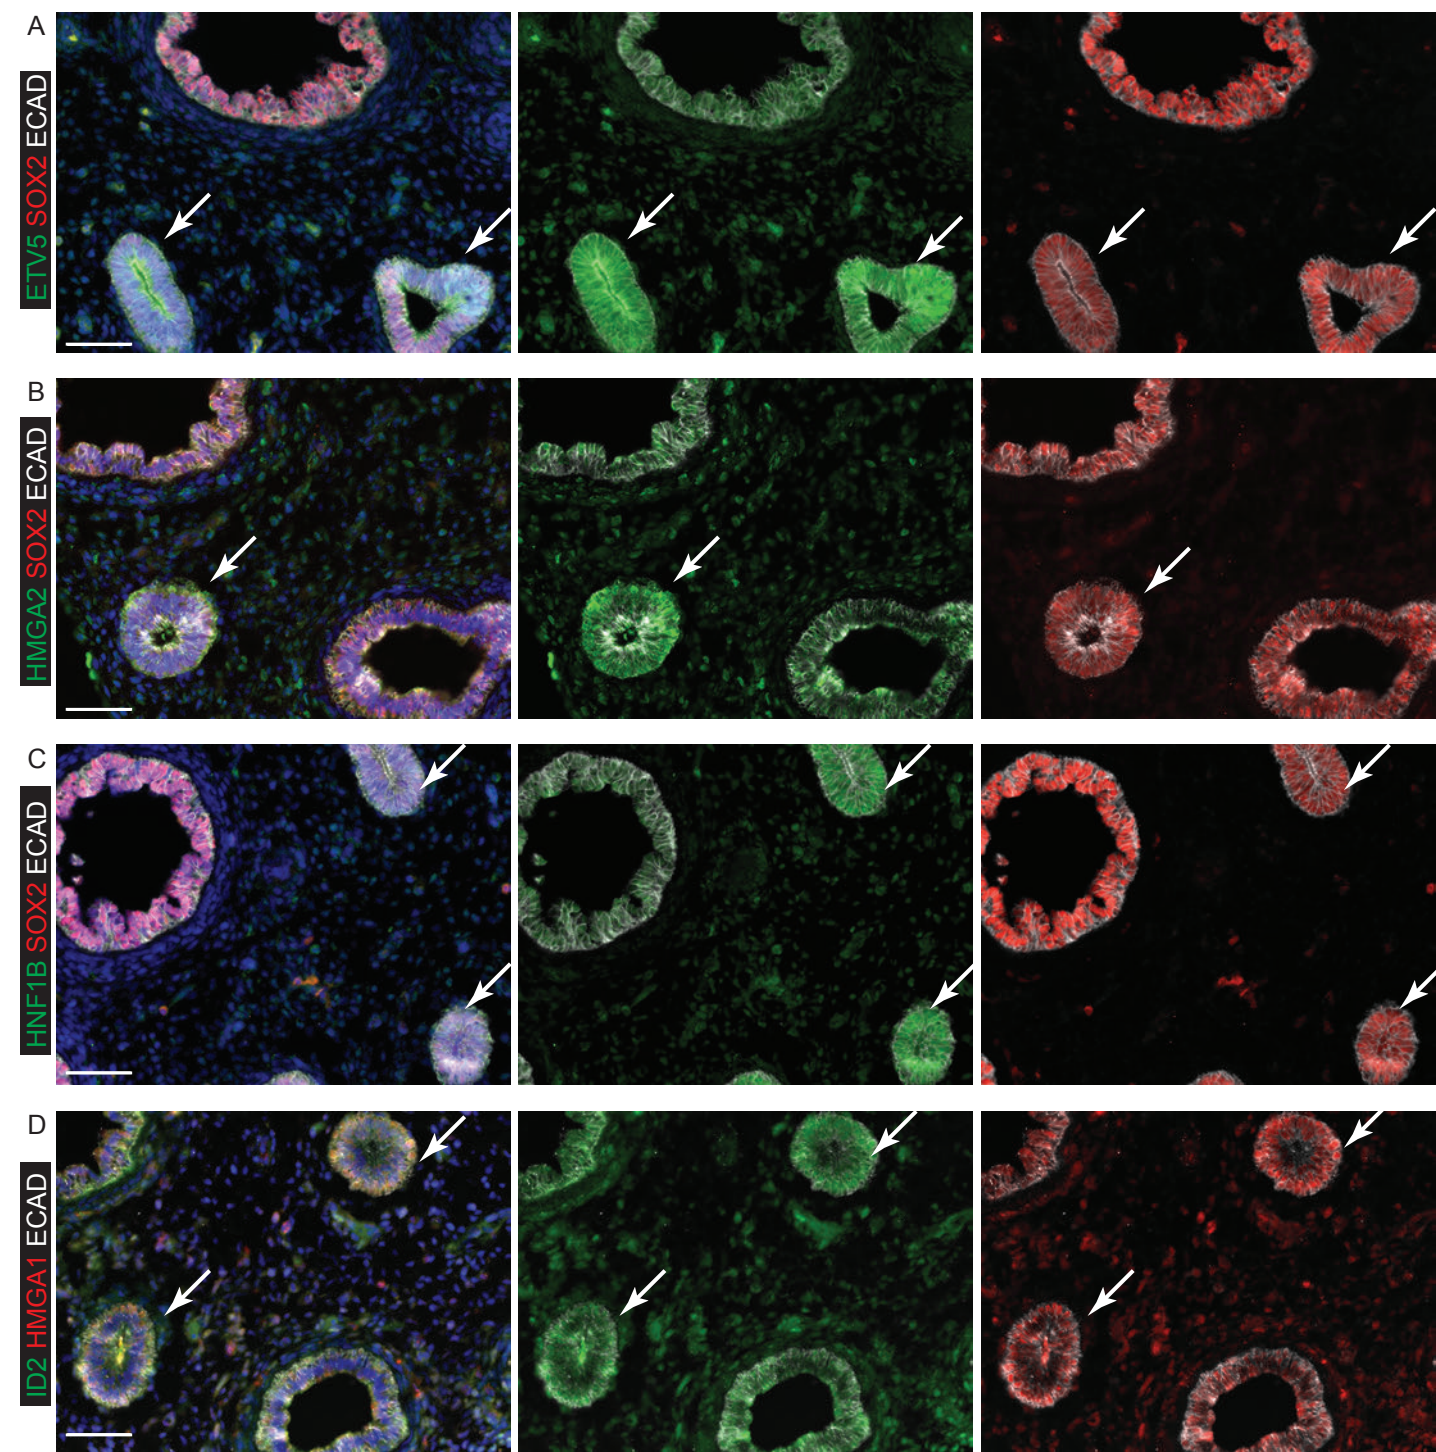

Supplement: supp [file elife_poa_e26575_Figure_2_figure_supplement_4.pdf › elife_poa_e26575_Figure_2_figure_supplement_4.pdf]

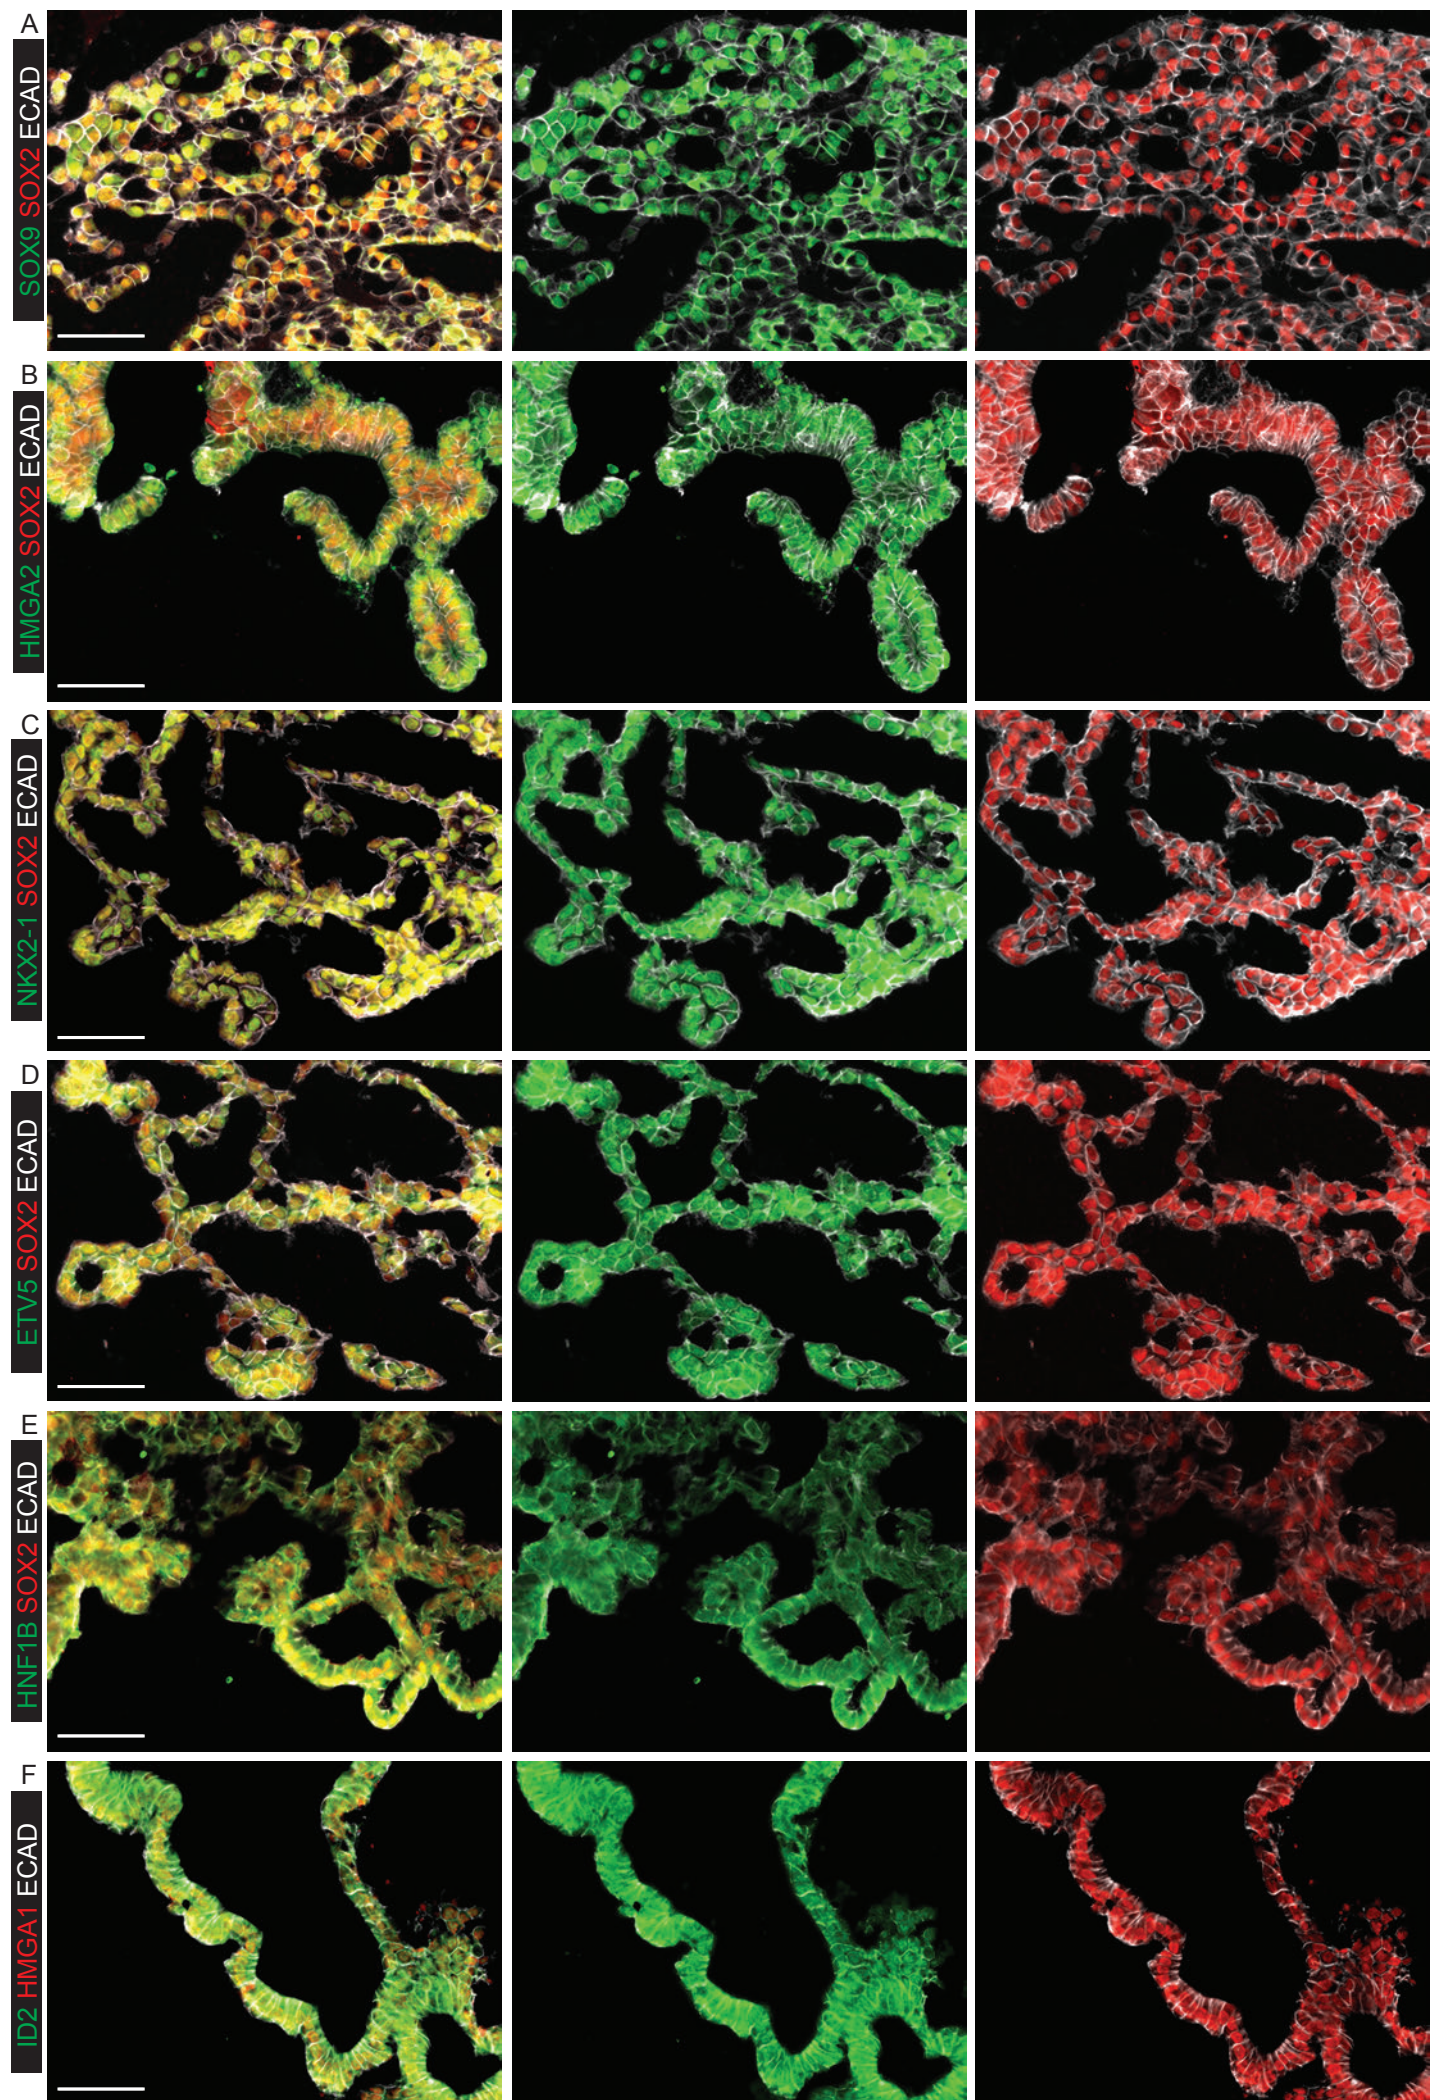

Supplement: supp [file elife_poa_e26575_Figure_3_figure_supplement_1.pdf › elife_poa_e26575_Figure_3_figure_supplement_1.pdf]

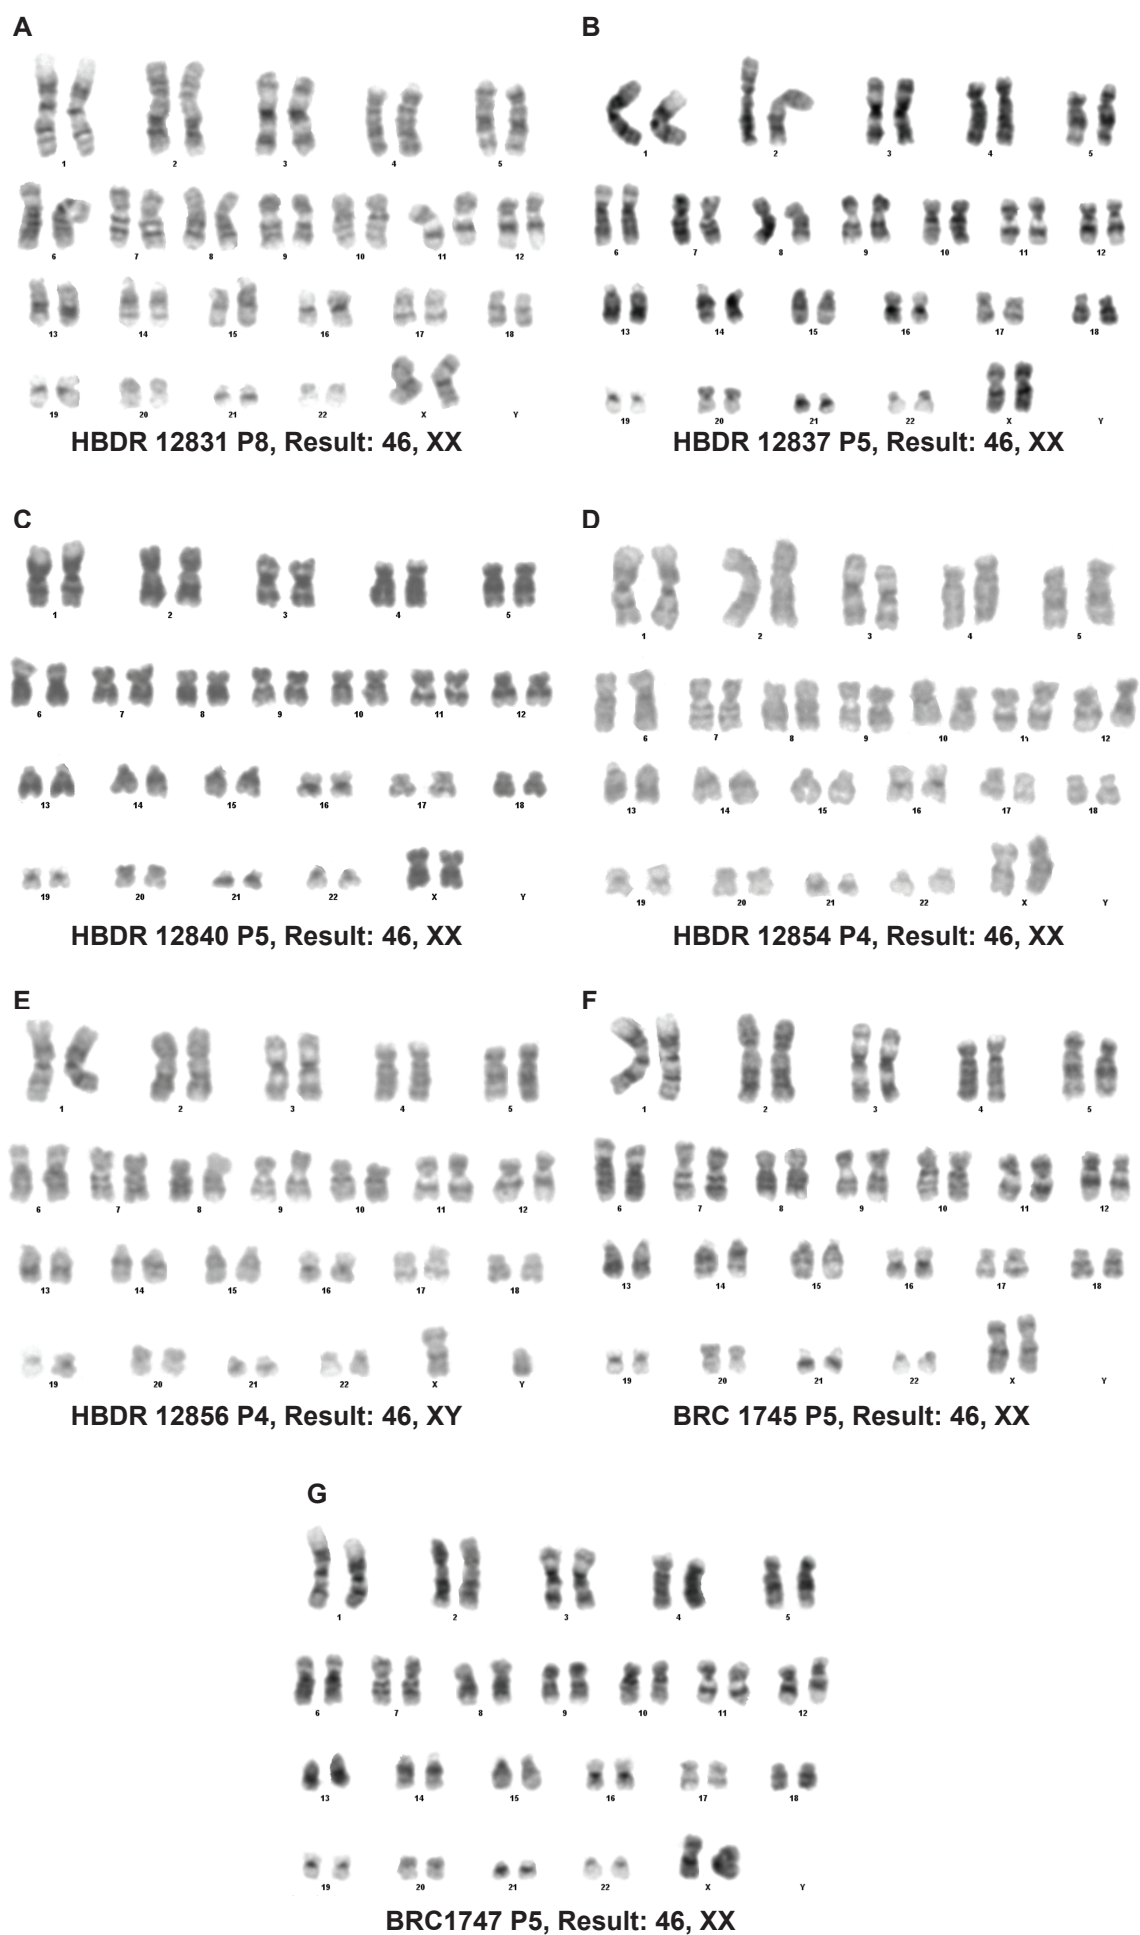

Supplement: supp [file elife_poa_e26575_Figure_3_figure_supplement_2.pdf › elife_poa_e26575_Figure_3_figure_supplement_2.pdf]

Nikolic et al. Figure 3, Supplement 3.

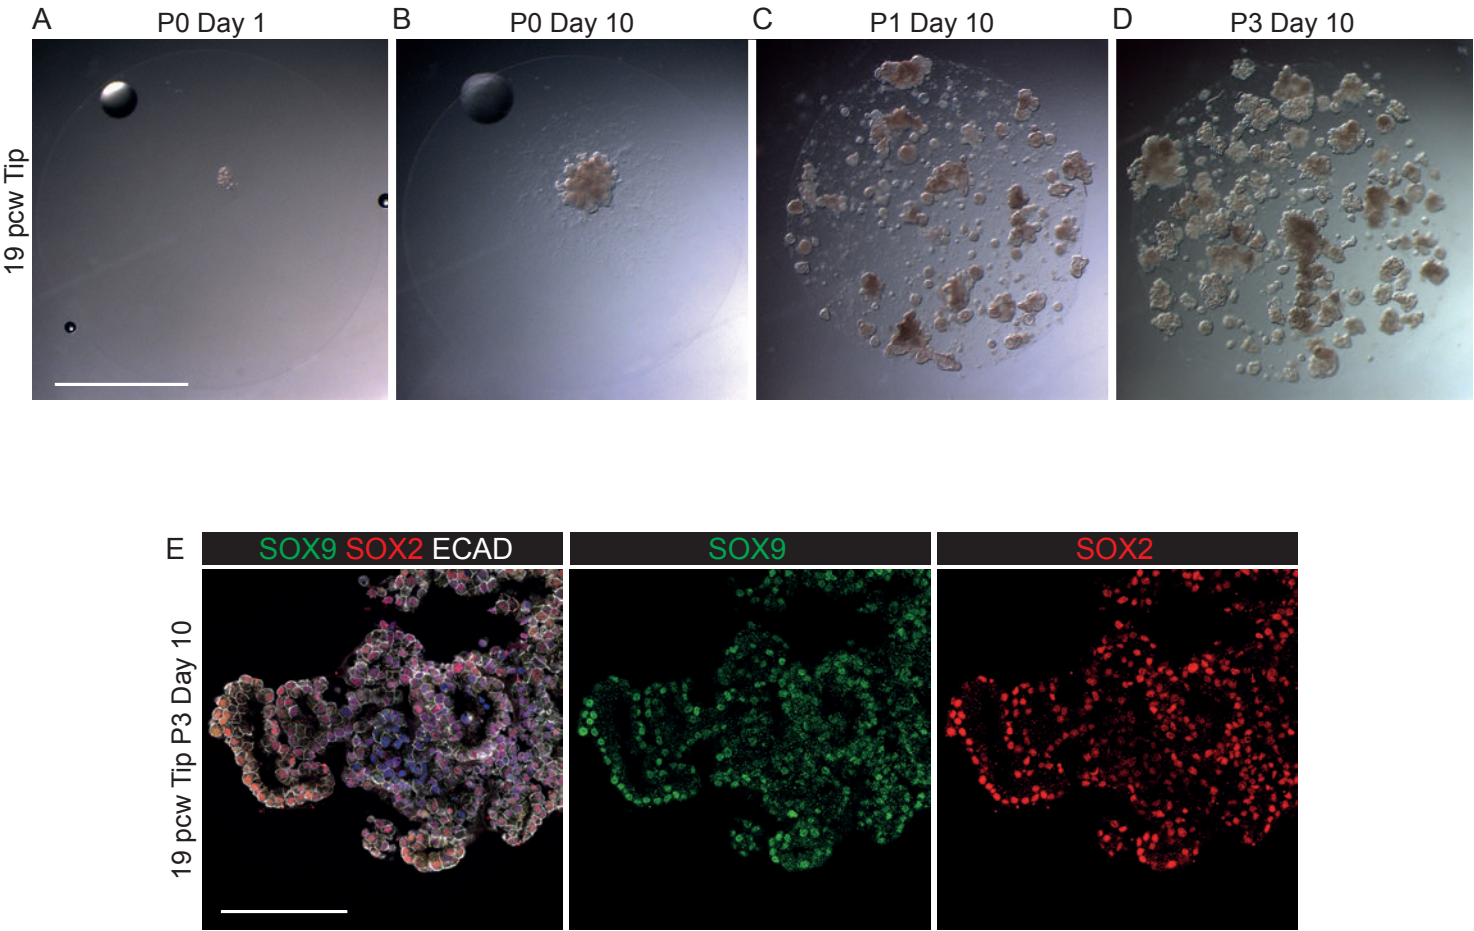

Supplement: supp [file elife_poa_e26575_Figure_3_figure_supplement_3.pdf › elife_poa_e26575_Figure_3_figure_supplement_3.pdf]

Nikolic et al. Figure 3, Supplement 4.

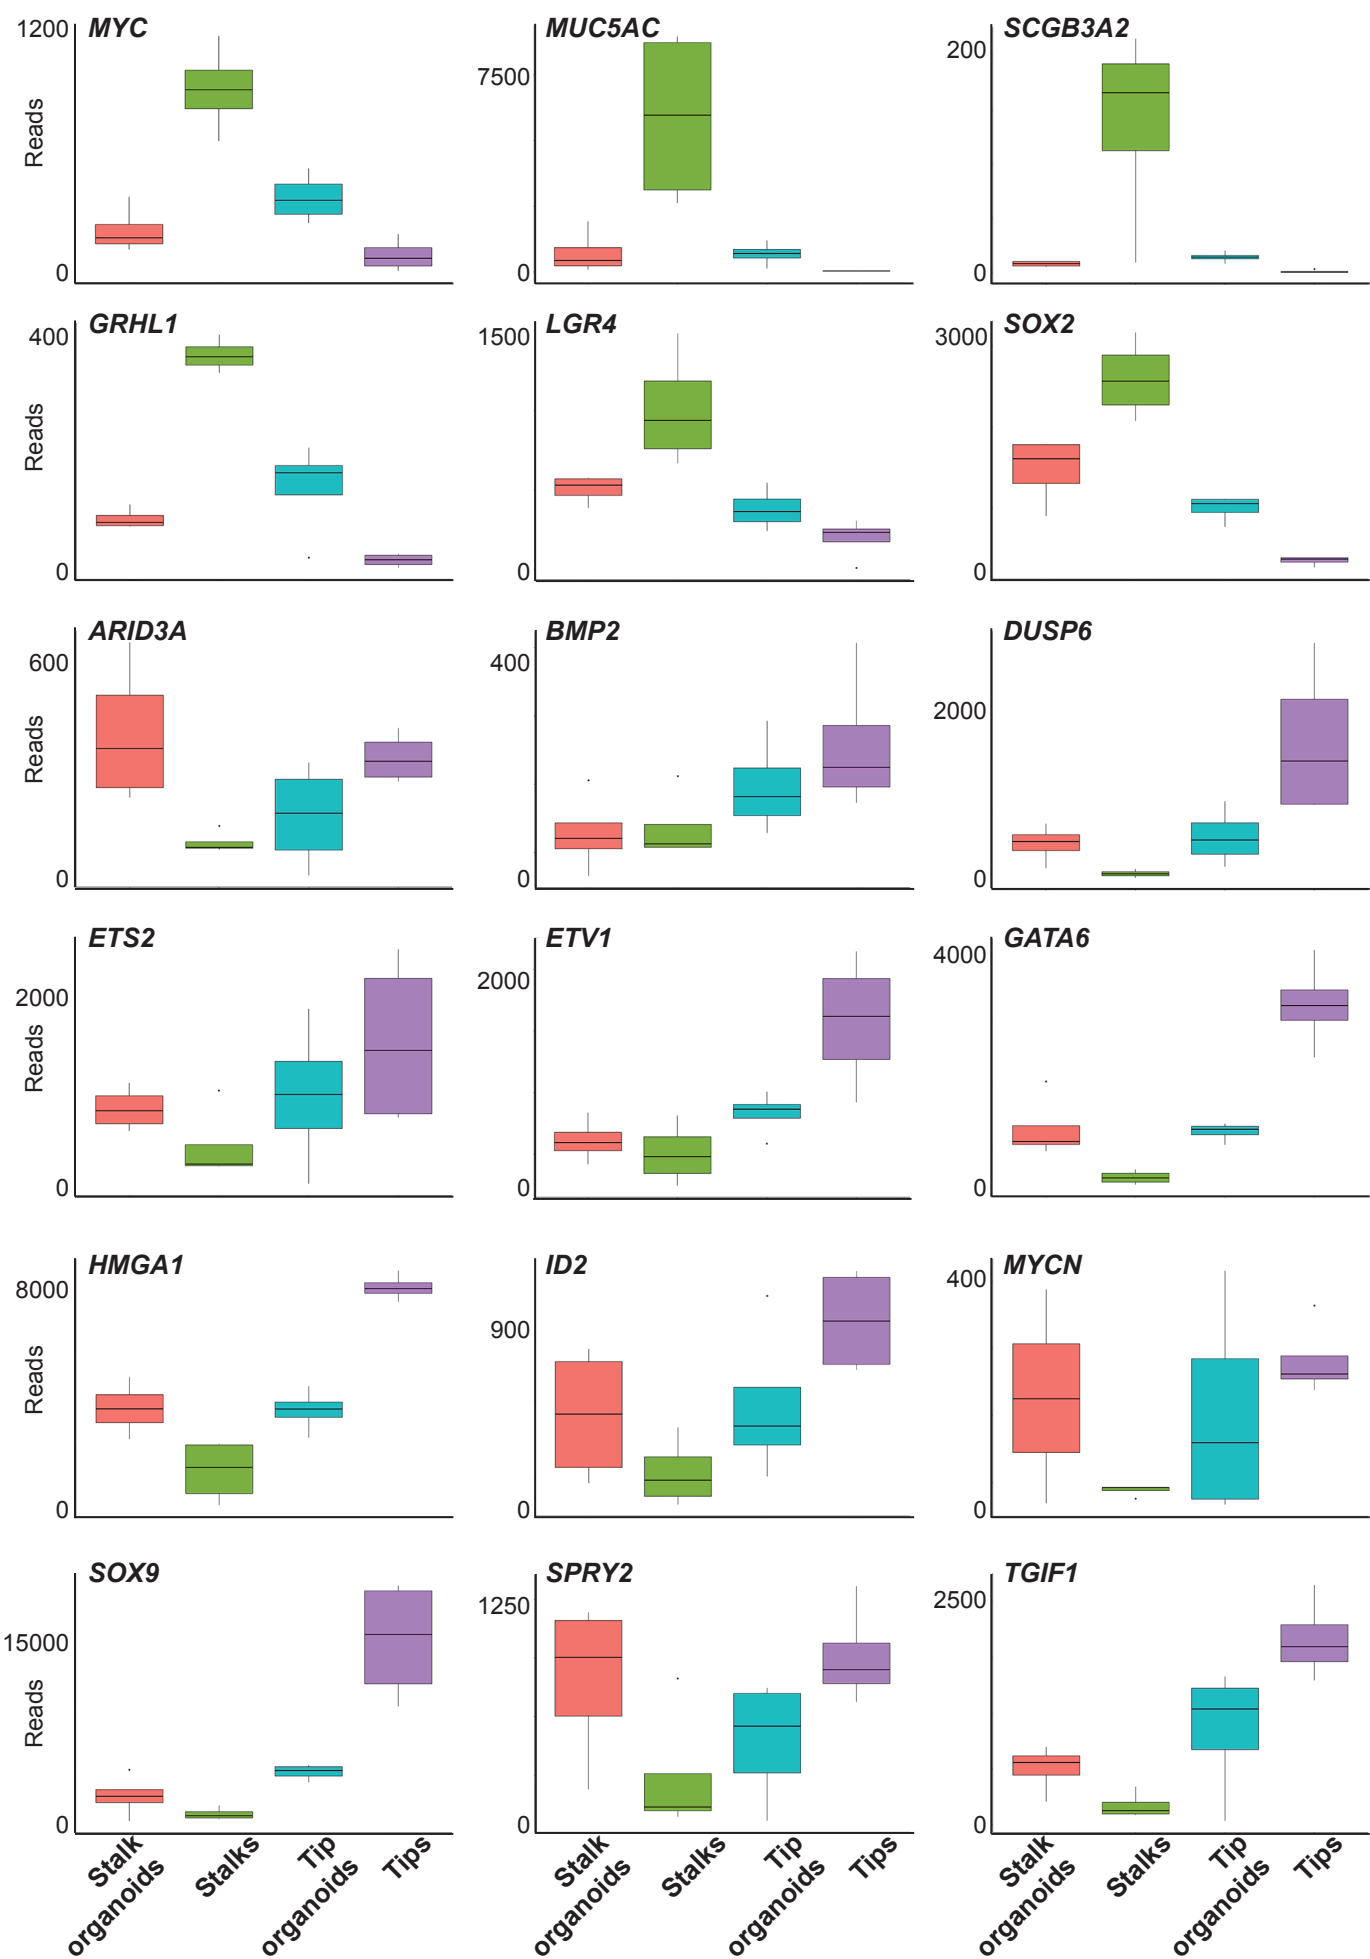

Supplement: supp [file elife_poa_e26575_Figure_3_figure_supplement_4.pdf › elife_poa_e26575_Figure_3_figure_supplement_4.pdf]

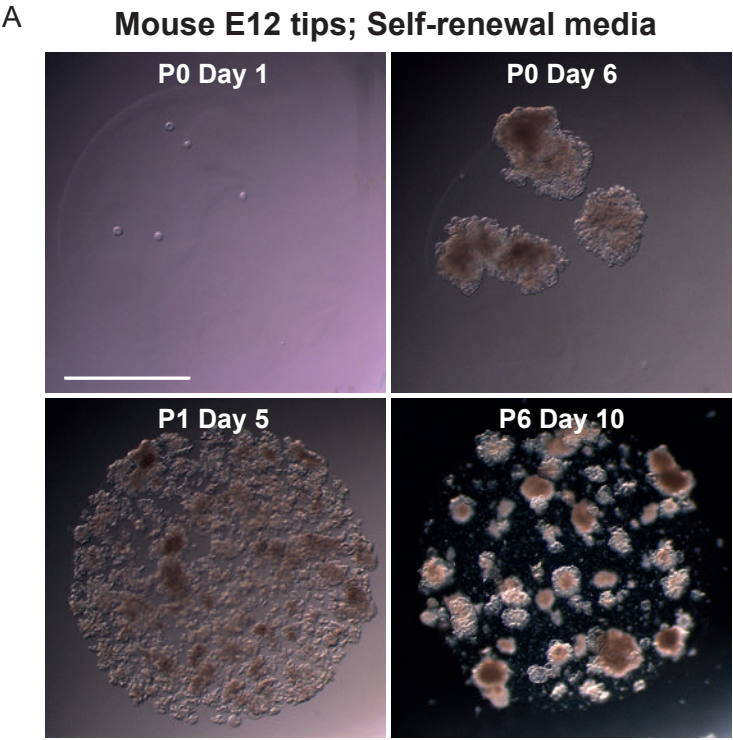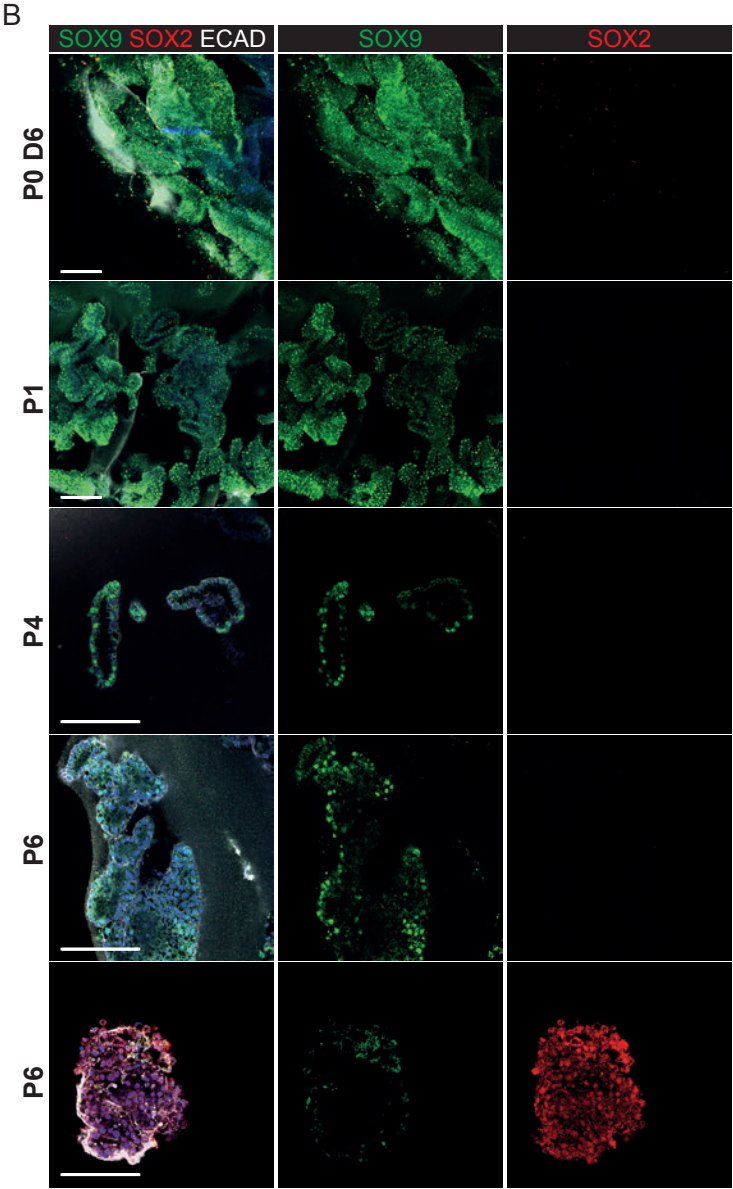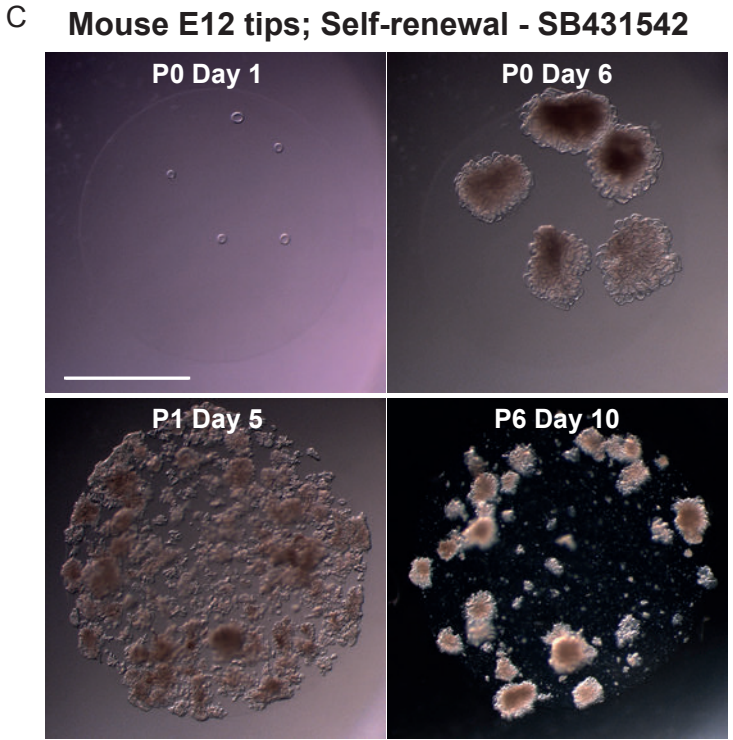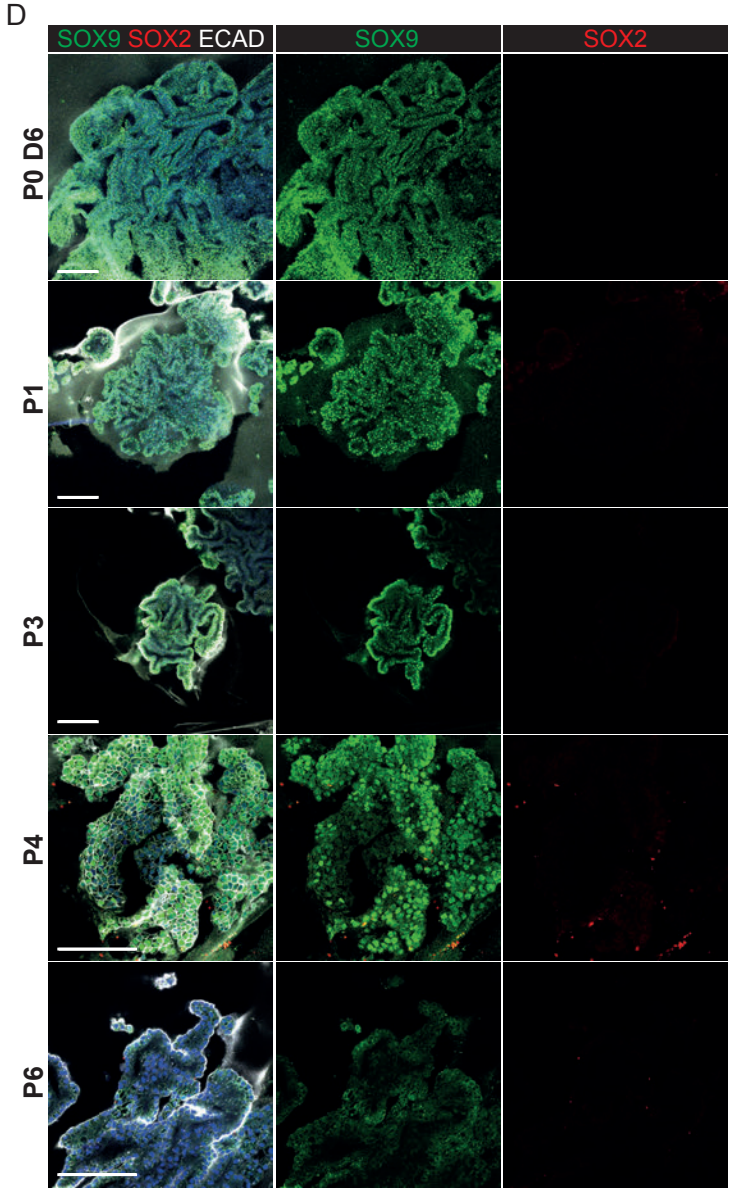

Supplement: supp [file elife_poa_e26575_Figure_3_figure_supplement_5.pdf › elife_poa_e26575_Figure_3_figure_supplement_5.pdf]

Nikolic et al. Figure 5, Supplement 1.

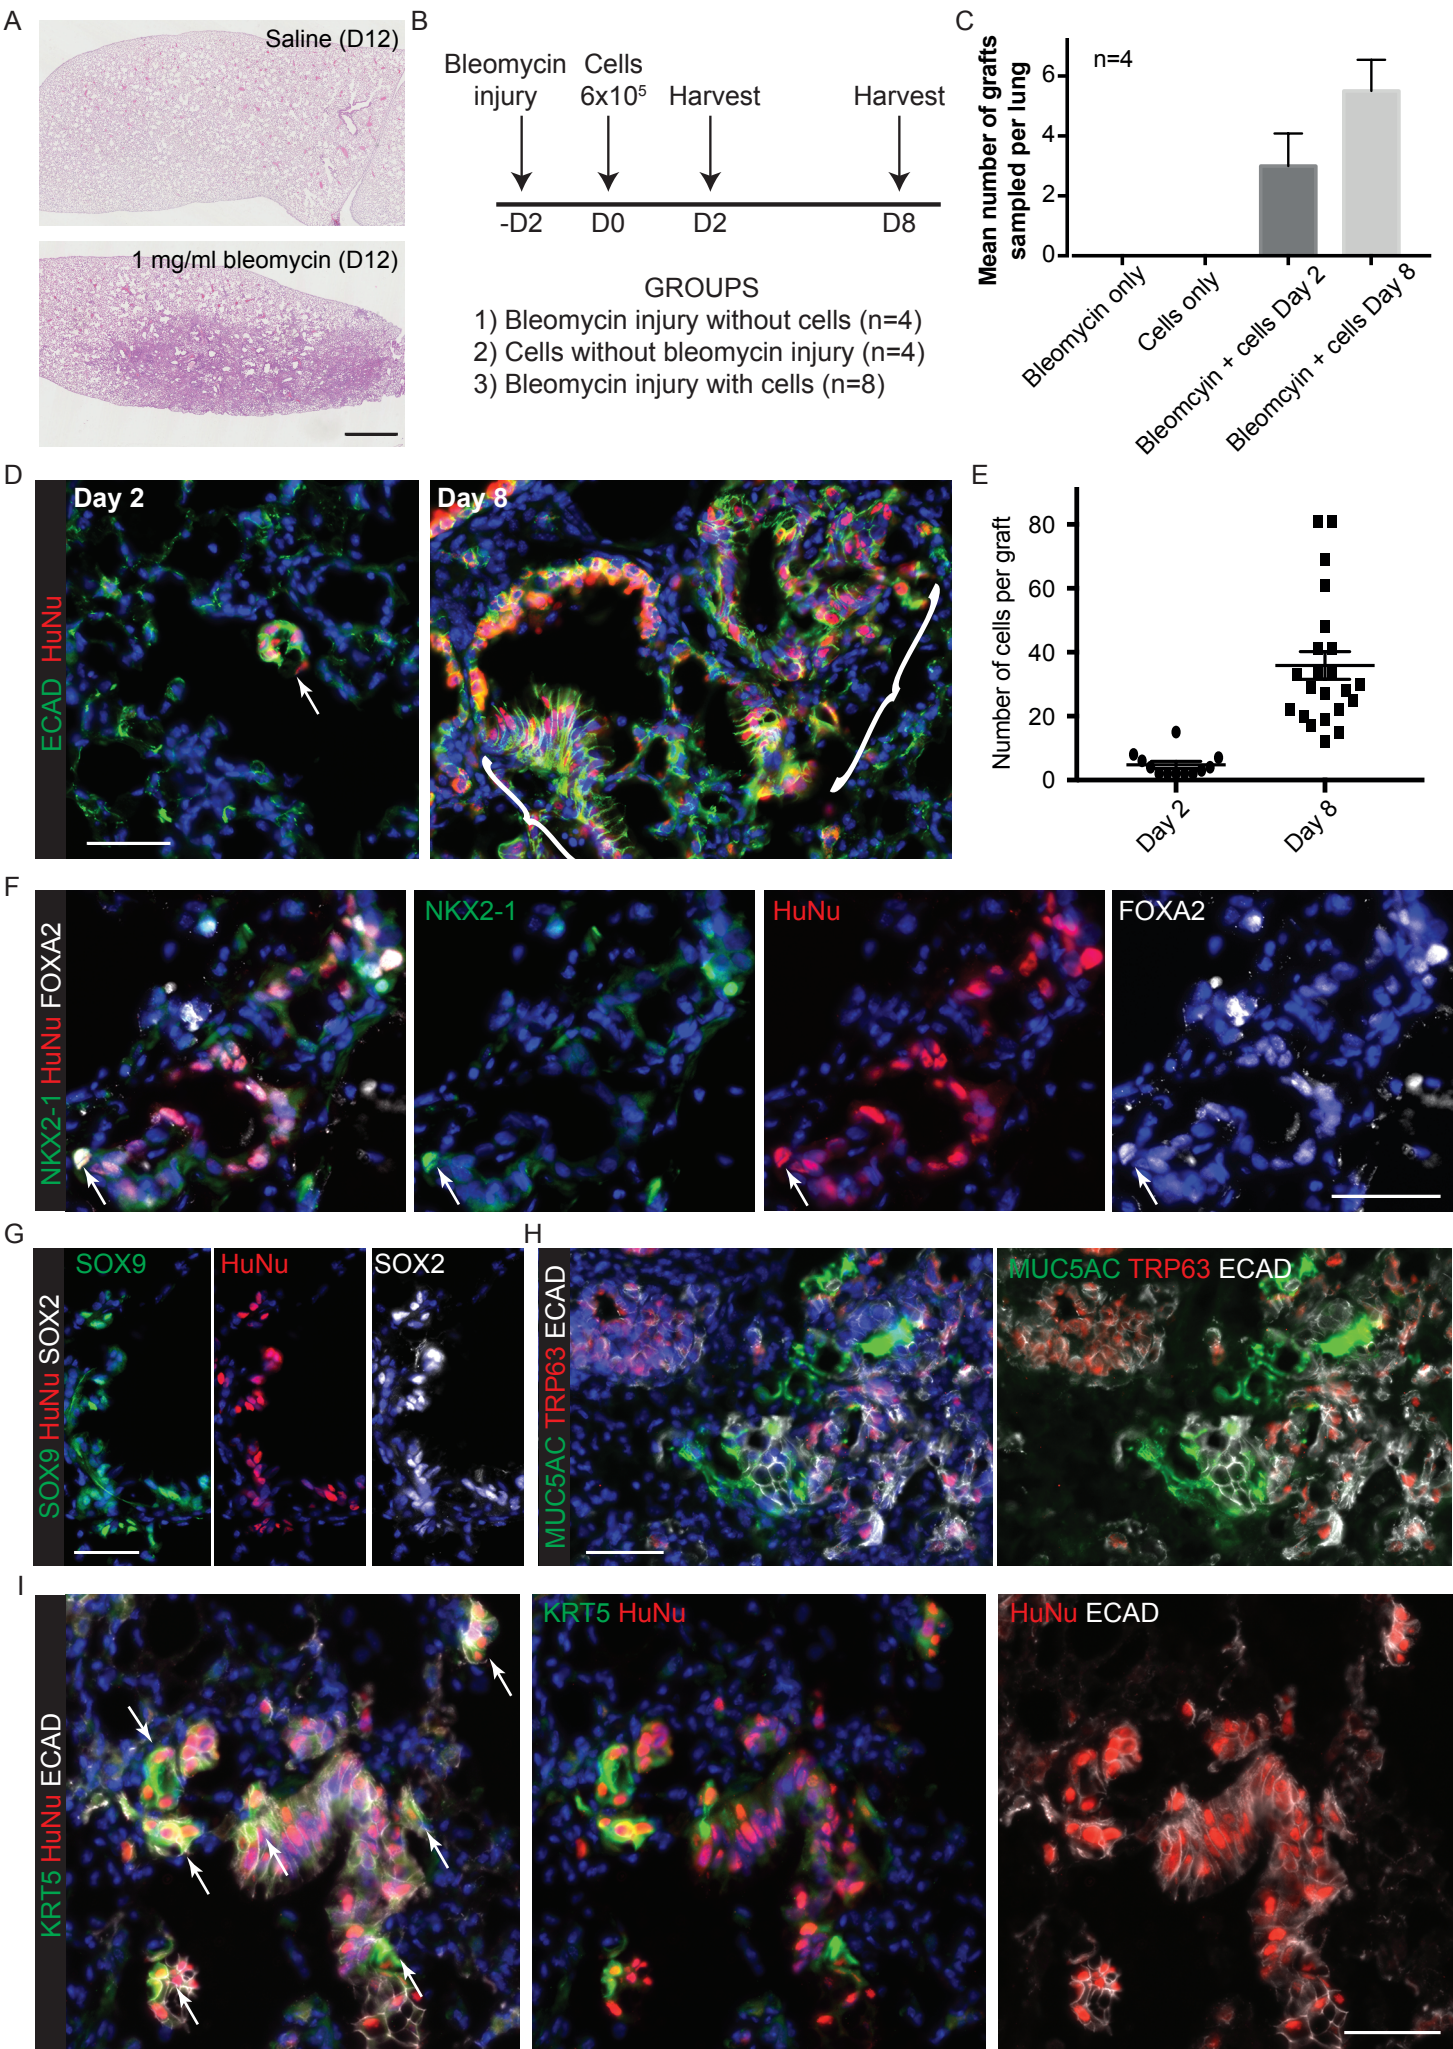

Supplement: supp [file elife_poa_e26575_Figure_5_figure_supplement_1.pdf › elife_poa_e26575_Figure_5_figure_supplement_1.pdf]

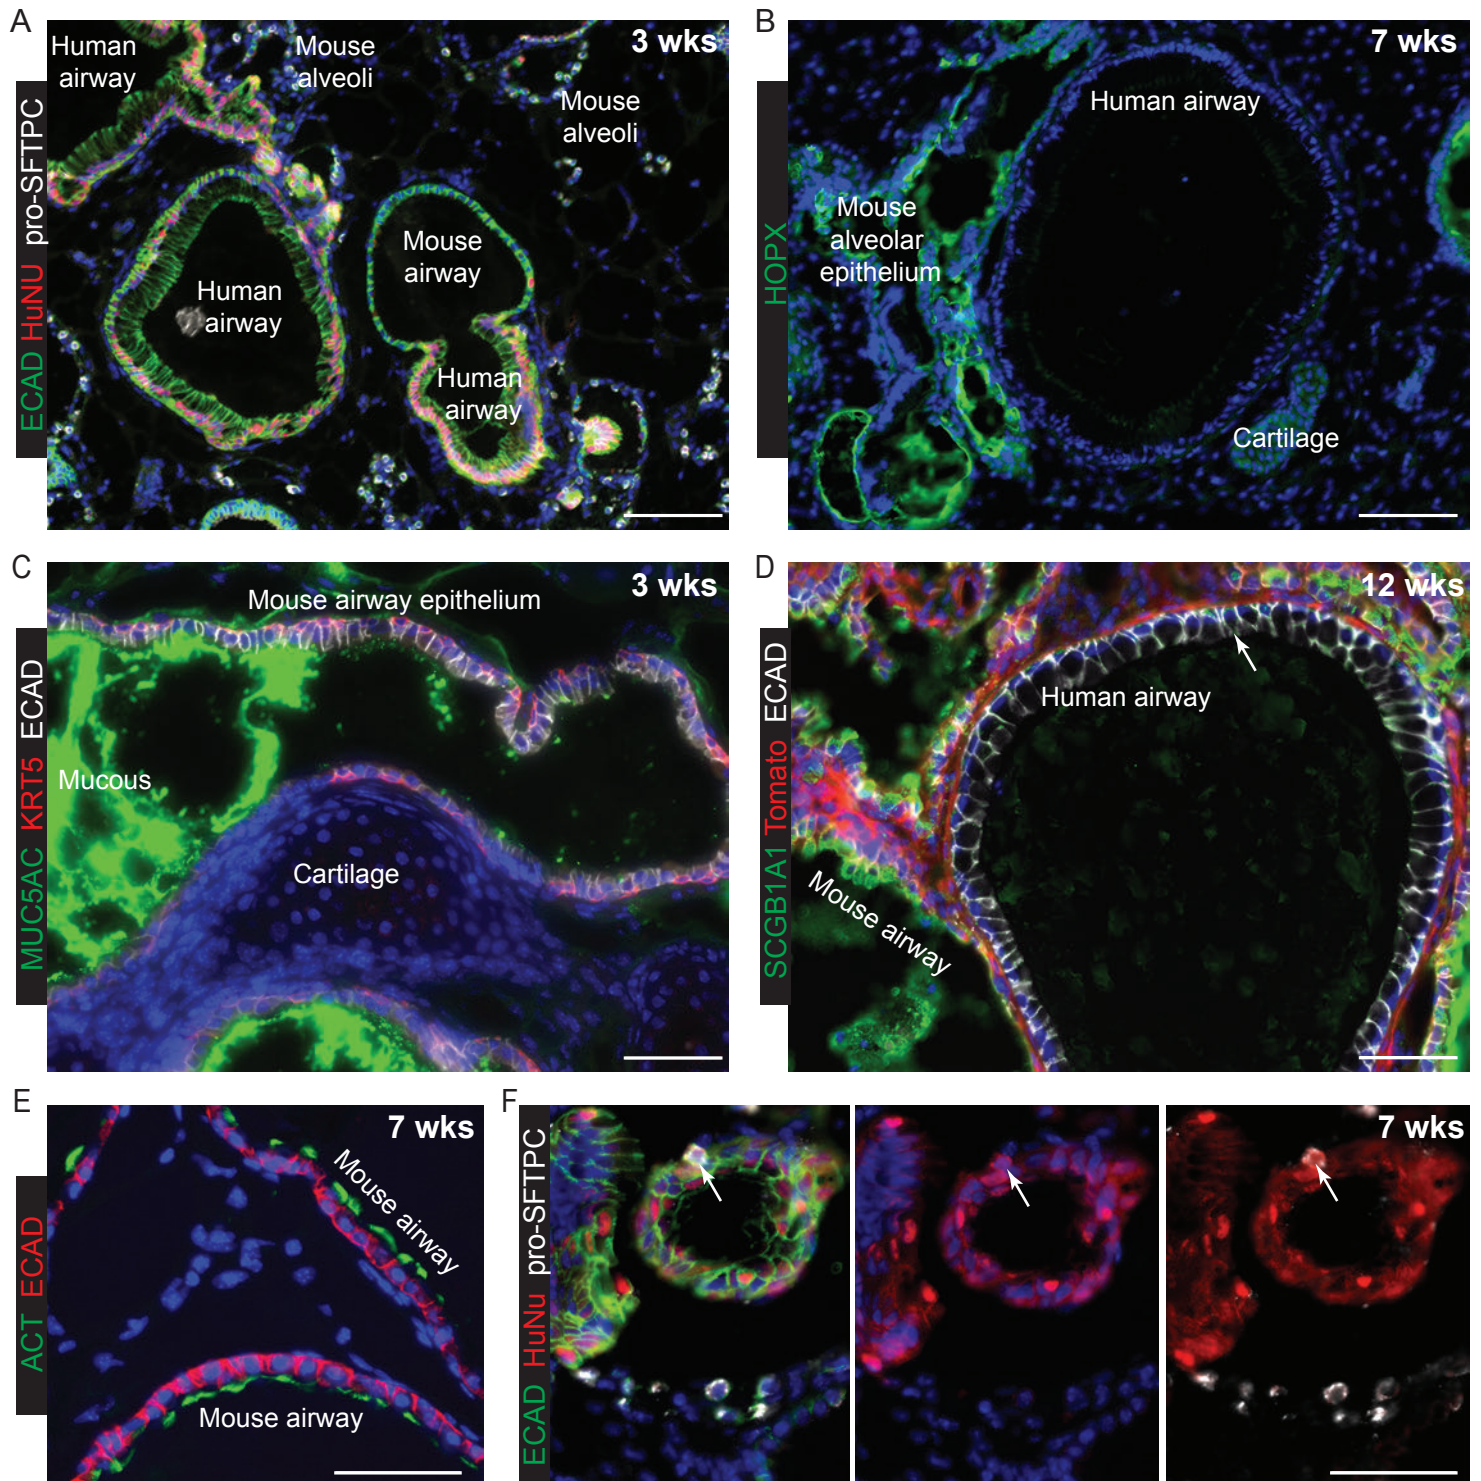

Supplement: supp [file elife_poa_e26575_Figure_5_figure_supplement_2.pdf › elife_poa_e26575_Figure_5_figure_supplement_2.pdf]

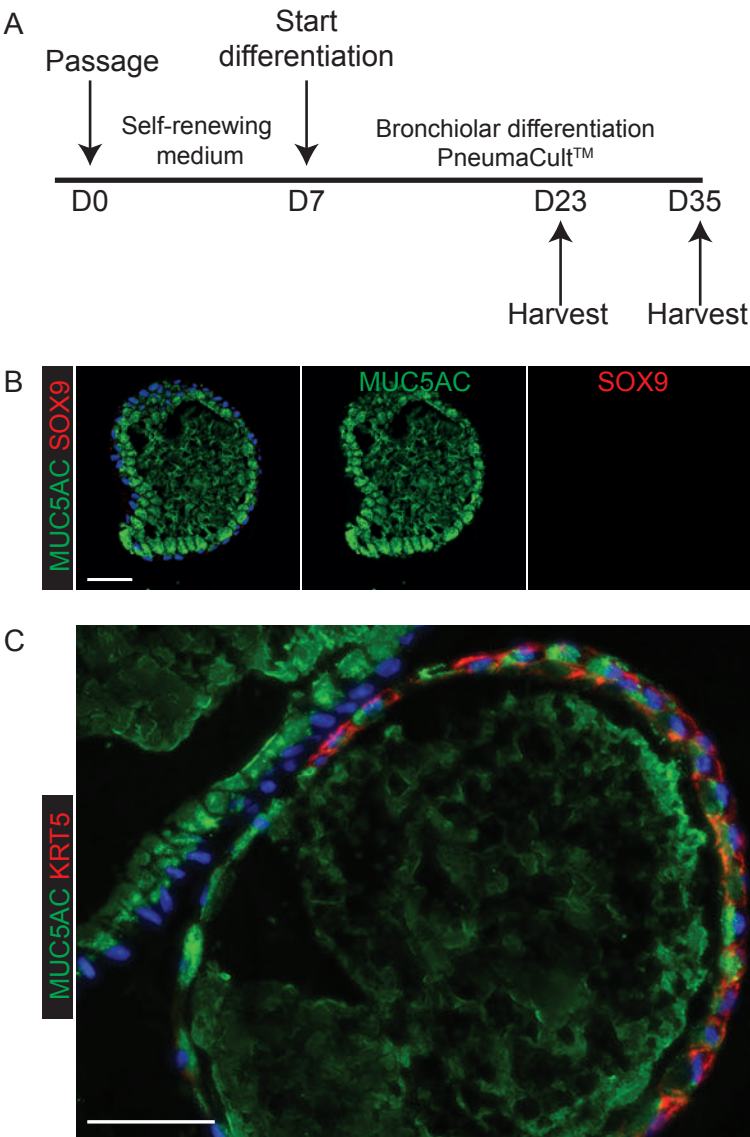

Supplement: supp [file elife_poa_e26575_Figure_6_figure_supplement_1.pdf › elife_poa_e26575_Figure_6_figure_supplement_1.pdf]

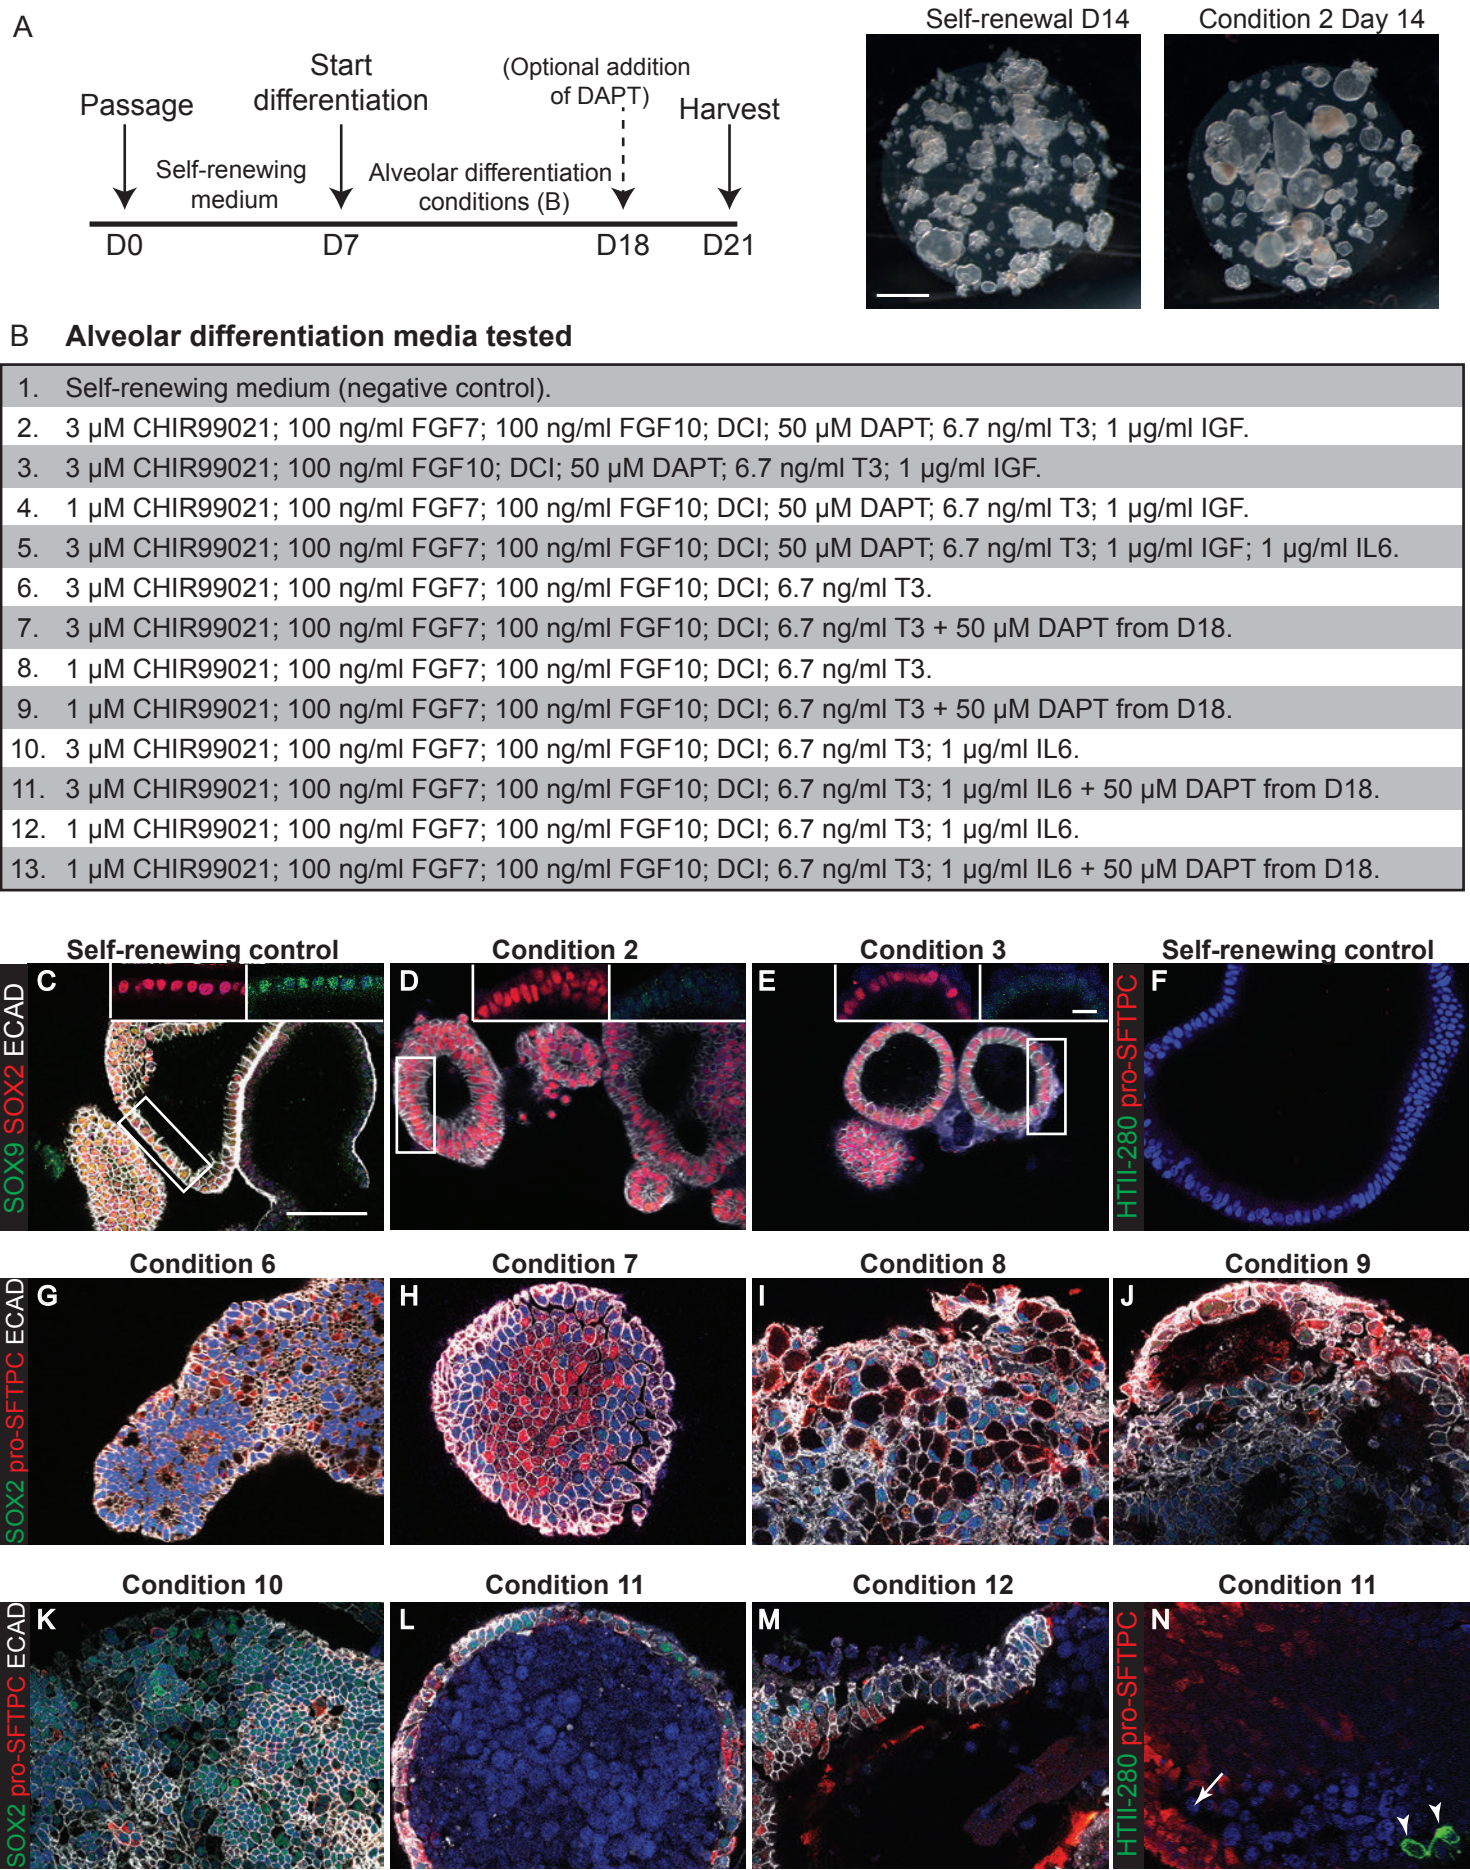

Supplement: supp [file elife_poa_e26575_Figure_6_figure_supplement_2.pdf › elife_poa_e26575_Figure_6_figure_supplement_2.pdf]

# Nikolic et al. Figure 6, Supplemental 3.

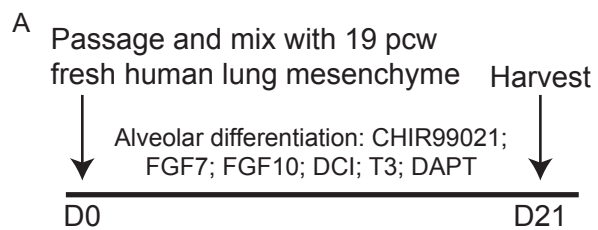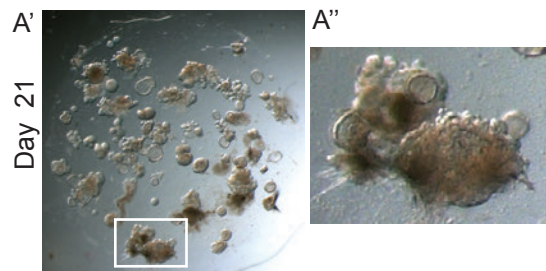

**8 pcw organoid**

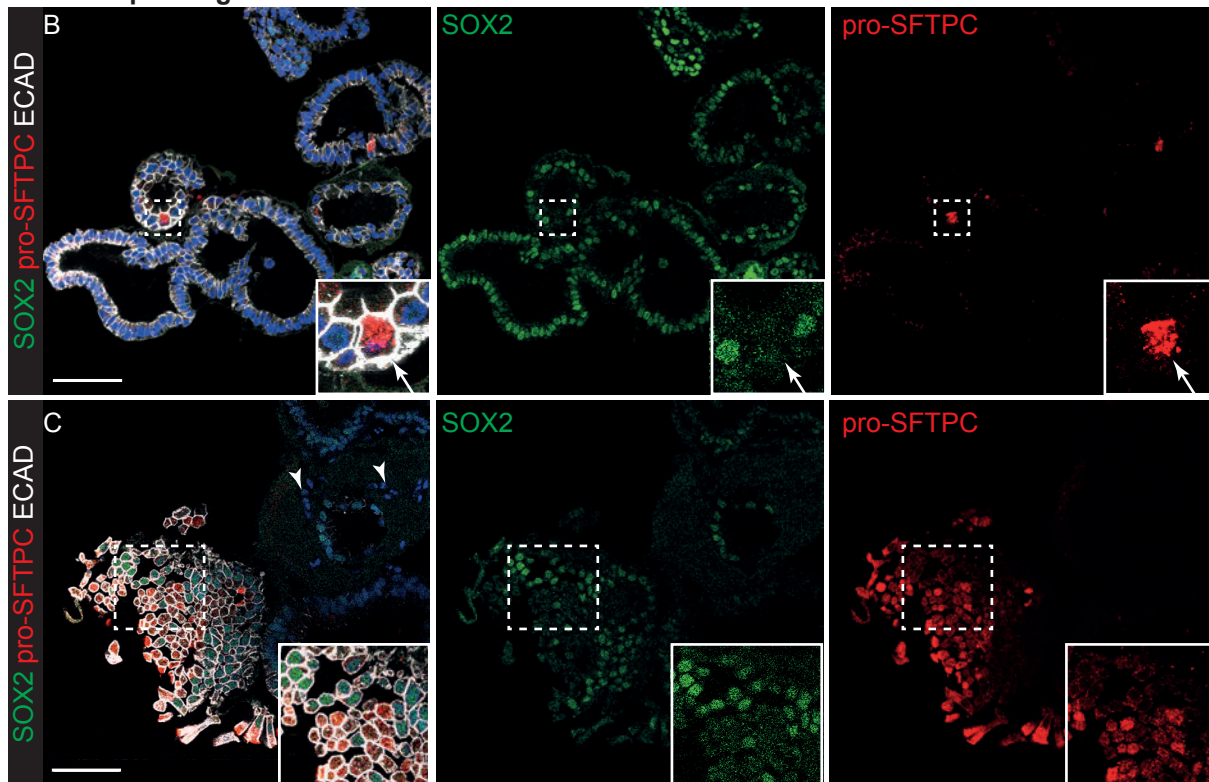

Supplement: supp [file elife_poa_e26575_Figure_6_figure_supplement_3.pdf › elife_poa_e26575_Figure_6_figure_supplement_3.pdf]

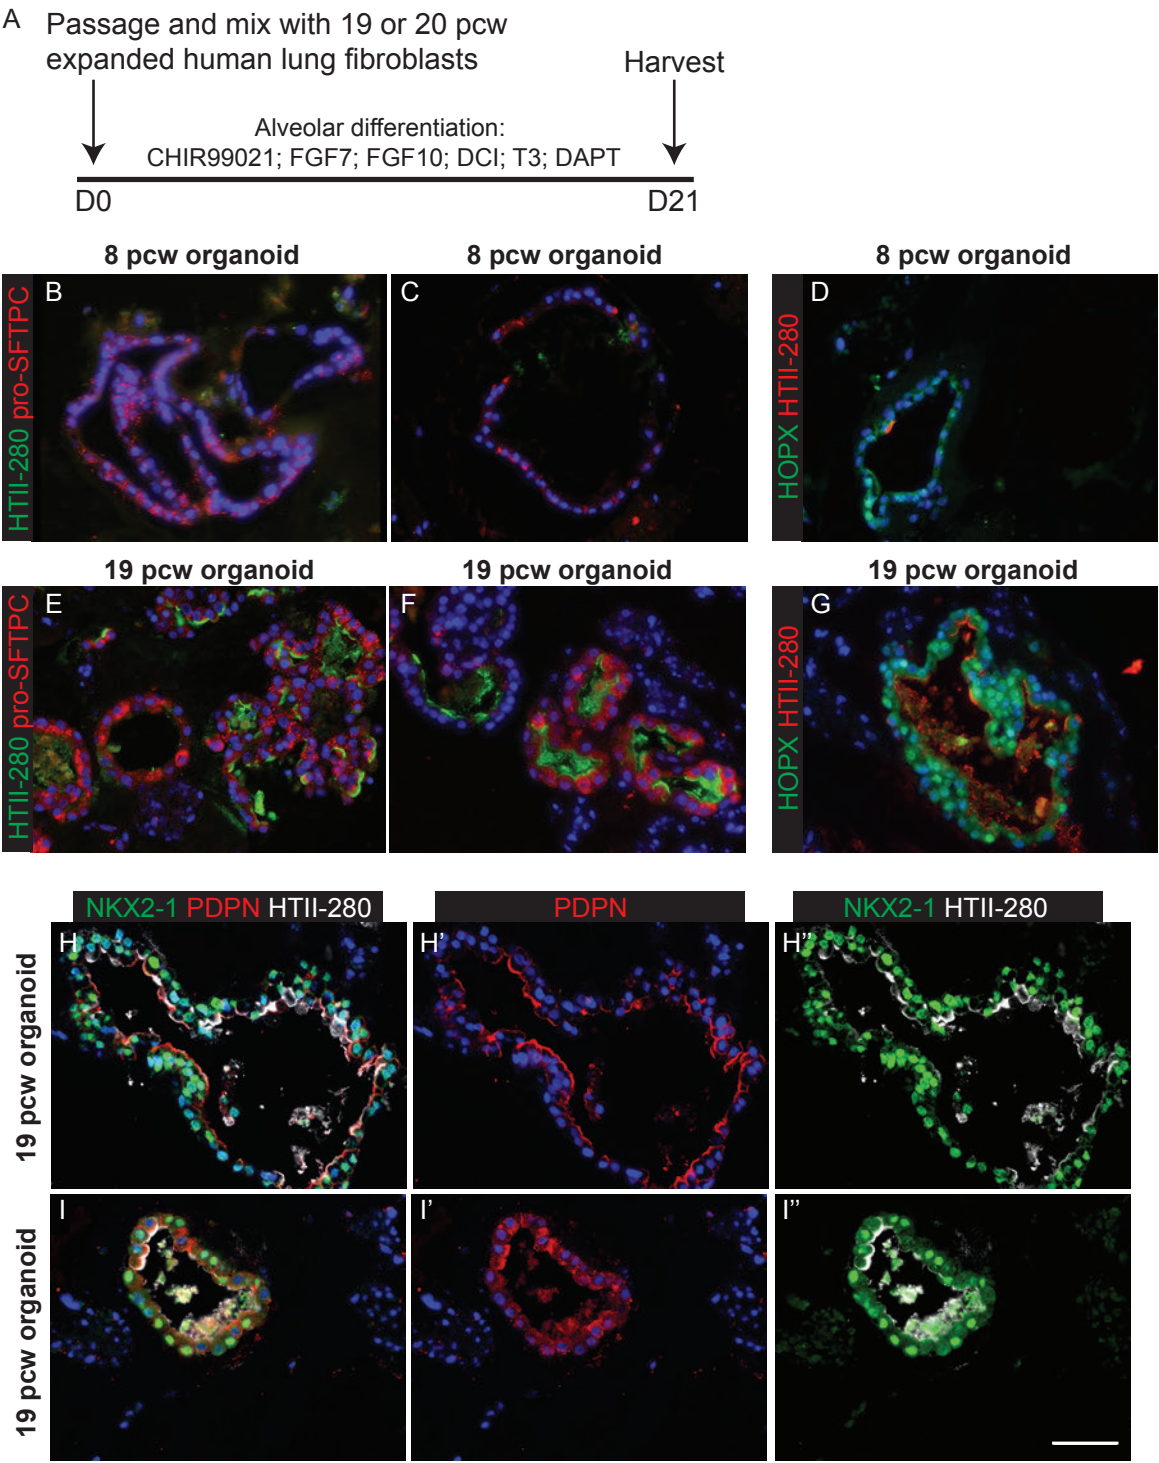

Supplement: supp [file elife_poa_e26575_Figure_6_figure_supplement_4.pdf › elife_poa_e26575_Figure_6_figure_supplement_4.pdf]

20 pcw sections

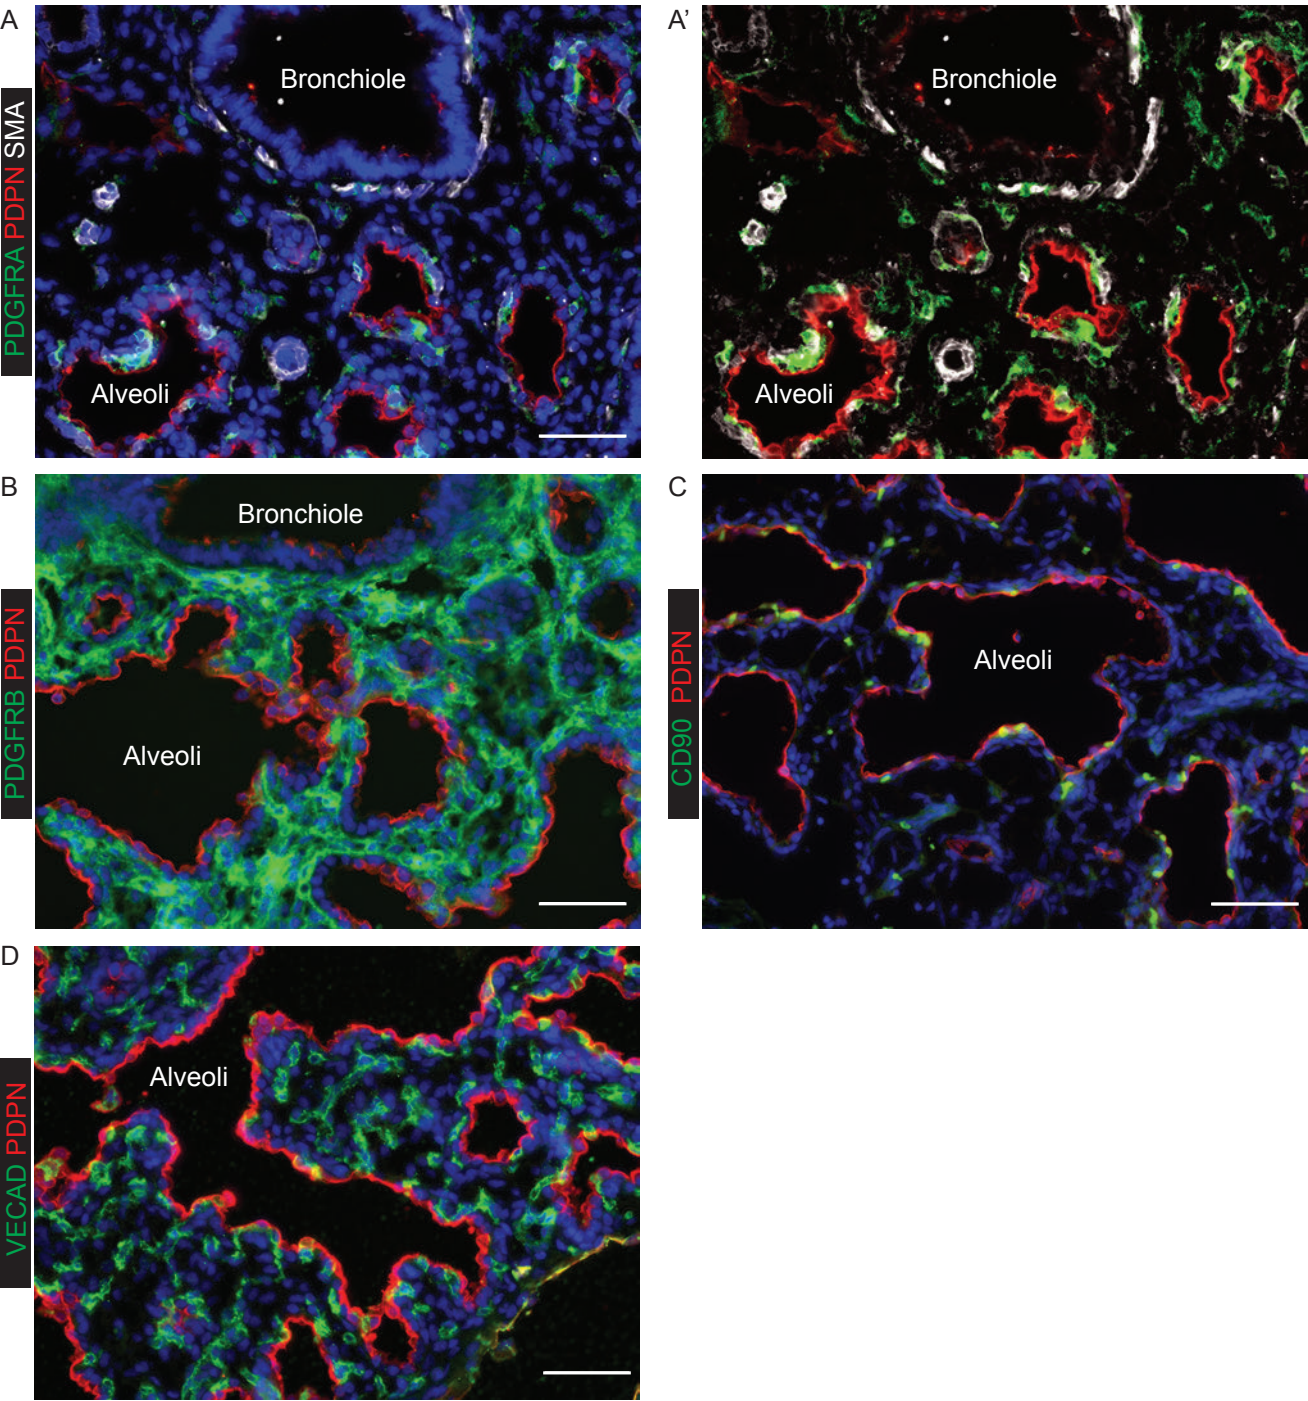

19 pcw fibroblasts, passage 3

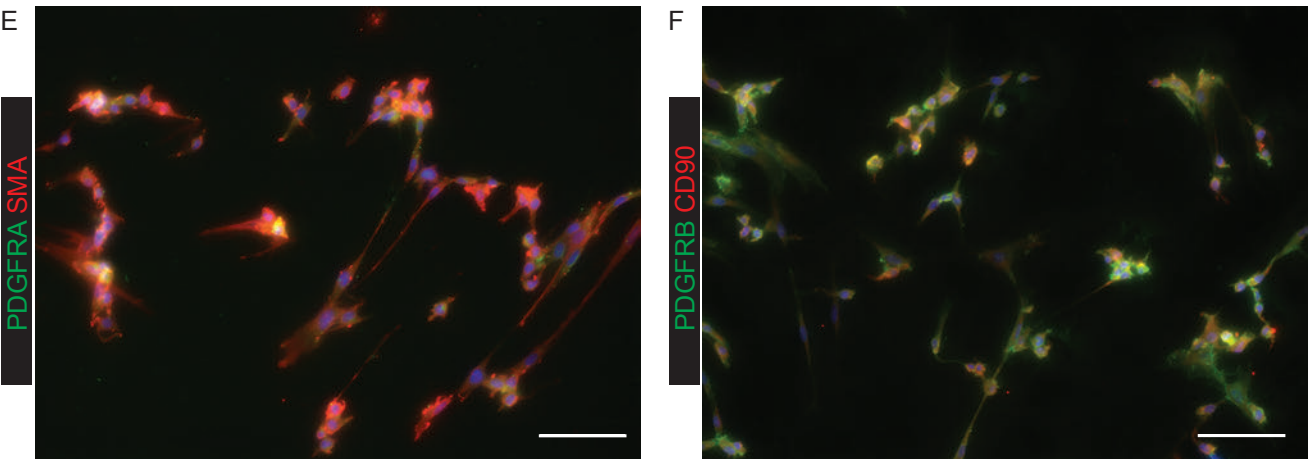

Supplement: supp [file elife_poa_e26575_Figure_6_figure_supplement_5.pdf › elife_poa_e26575_Figure_6_figure_supplement_5.pdf]
